# Supplementary material for: Bacterial vaginosis-driven changes in cervicovaginal immunity that expand the immunological hypothesis for increased HIV susceptibility
Source: PubMed Central journal article supplement — bioRxiv. 2025 Jan 14:2024.07.03.601916. Originally published 2024 Jul 5. Preprint. [Version 2] doi: 10.1101/2024.07.03.601916 (PMC11245000; doi:10.1101/2024.07.03.601916), 2025-01-14
Supplement: media-1.pdf [file media-1.pdf]

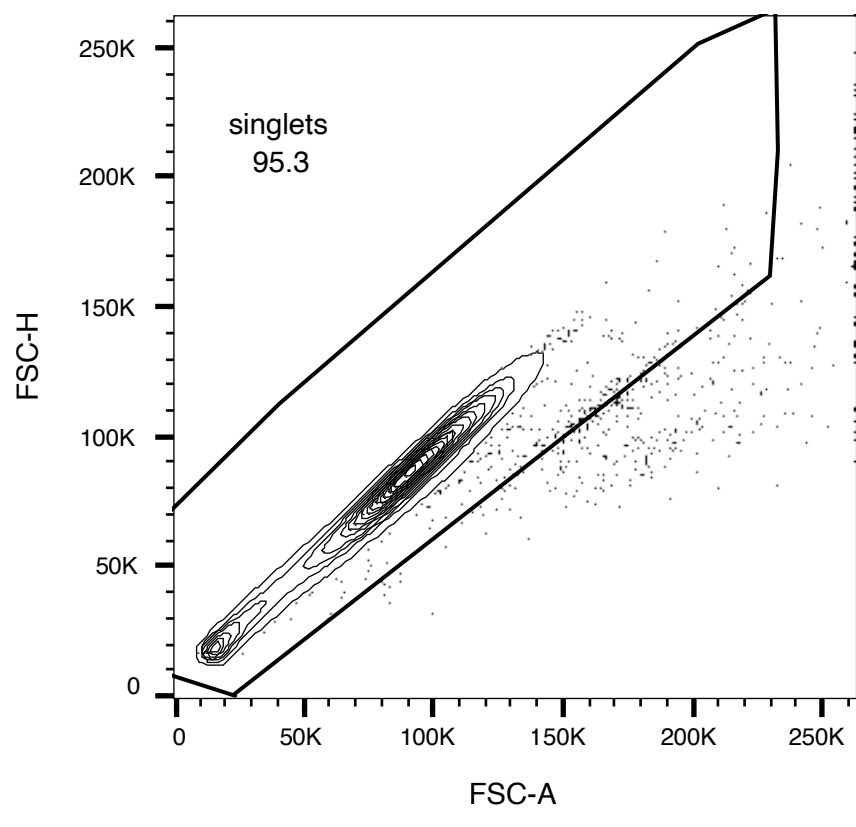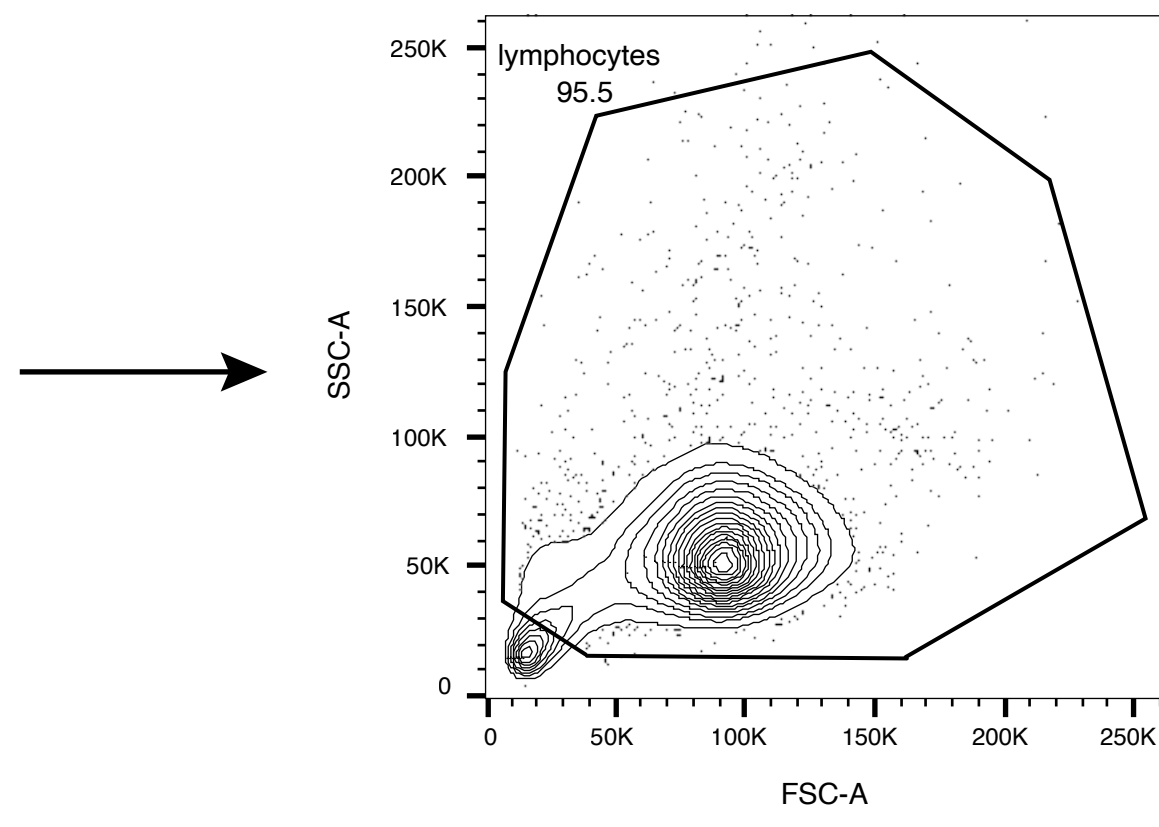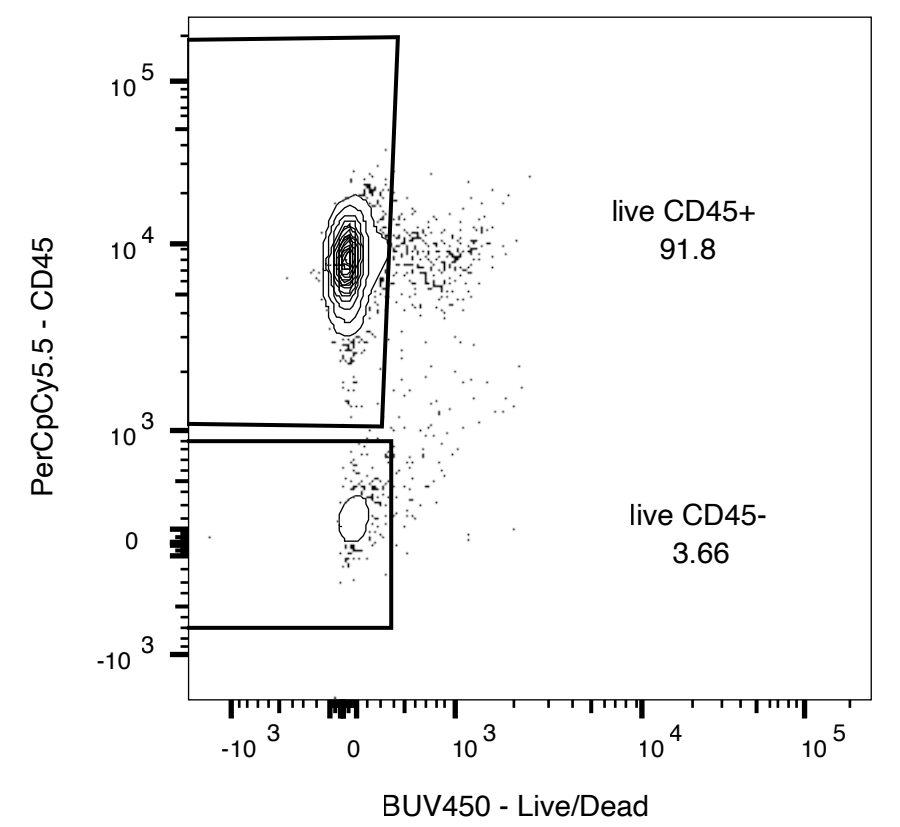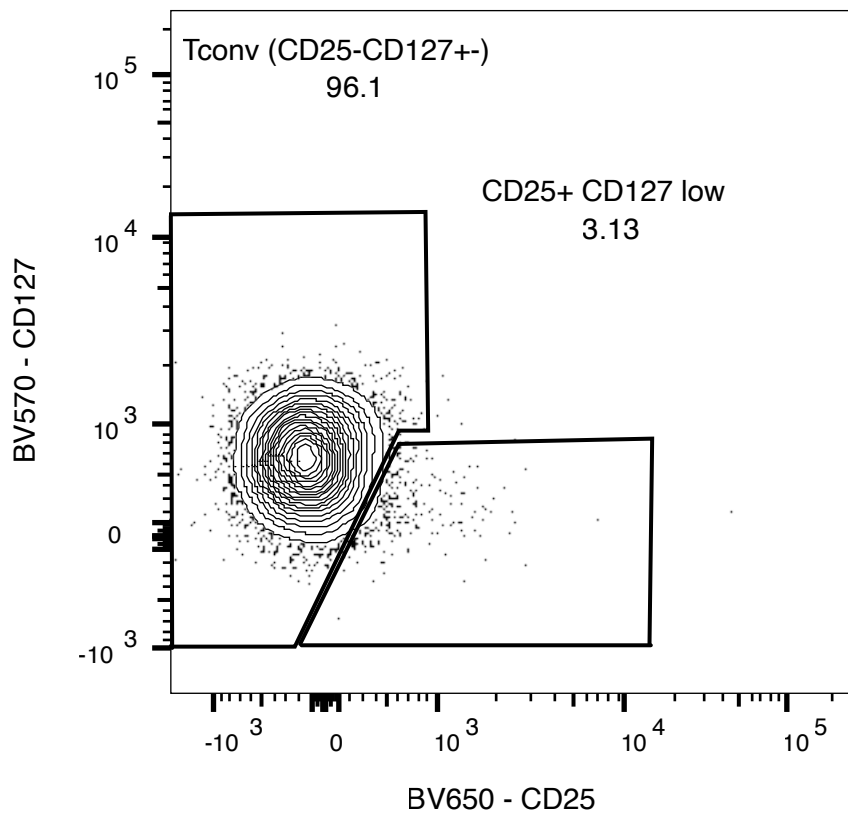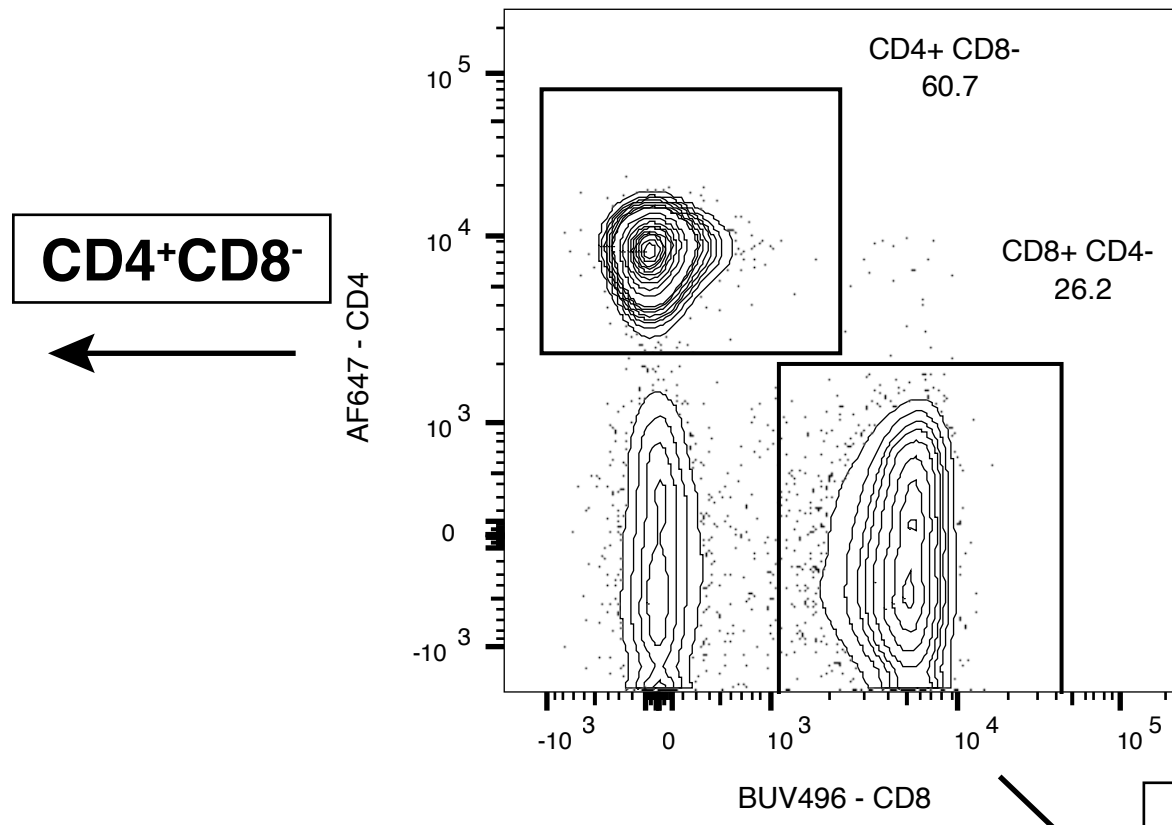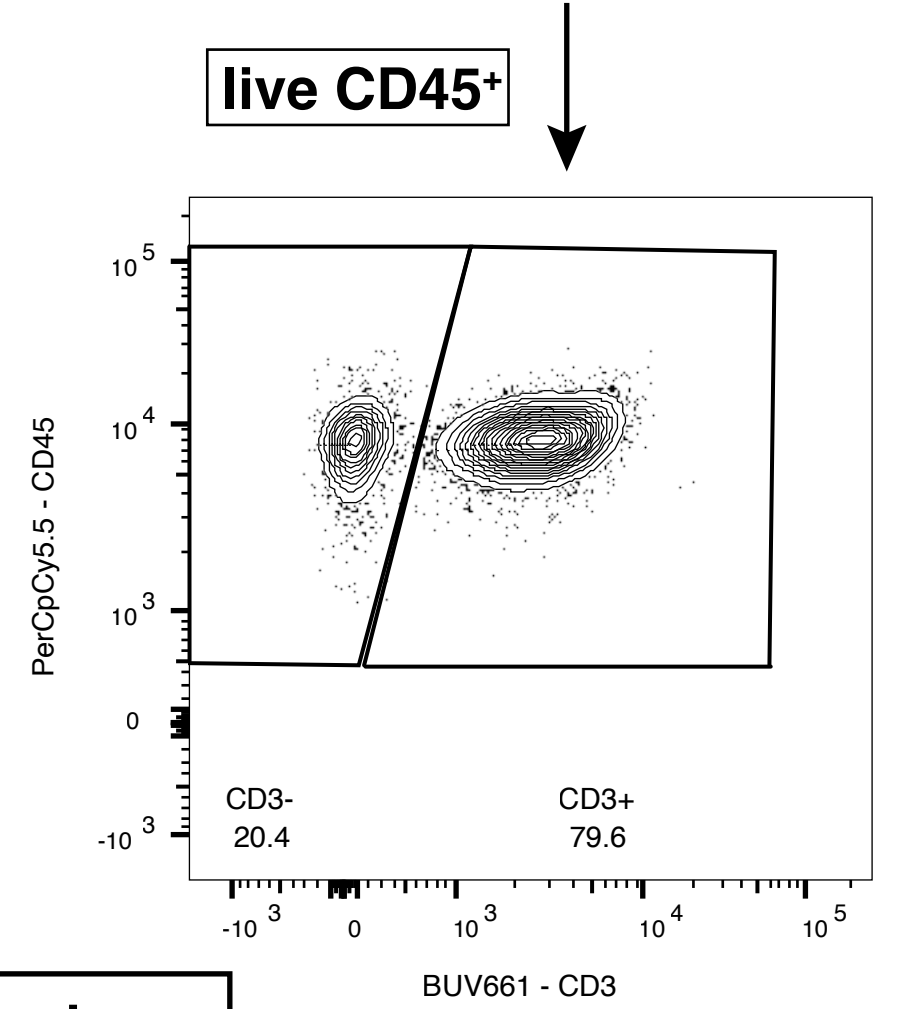

**CD25+ CD127<sup>low</sup>**

**CD25-CD127<sup>+</sup> (Tconv)**

**CD4<sup>+</sup>CD8<sup>-</sup>**

**CD3<sup>+</sup>**

**live CD45<sup>+</sup>**

**CD8<sup>+</sup>CD4<sup>-</sup>**

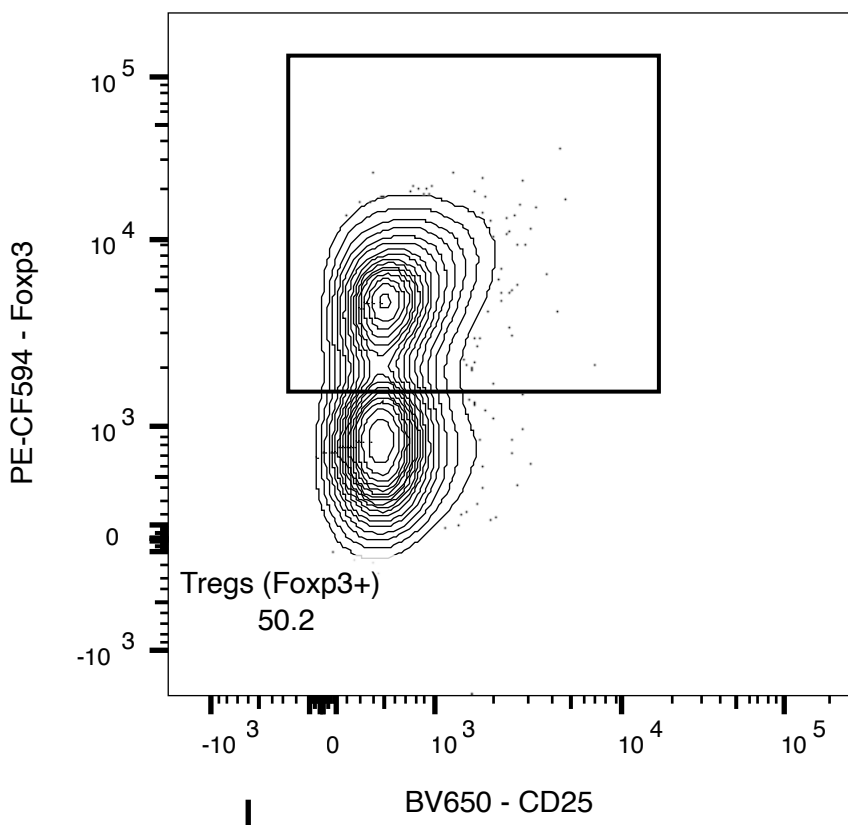

**Tregs**

**Tconv Phenotypes**

- CCR5<sup>+</sup>
- CCR6<sup>+</sup>
- CD45RA<sup>+/-</sup>/CCR7<sup>+/-</sup>
- CD38<sup>+</sup>
- CD39<sup>+</sup>
- CD69<sup>+</sup>
- CD101<sup>+</sup>
- CD69<sup>+/-</sup>CD103<sup>+/-</sup>
- CTLA-4<sup>+</sup>
- CXCR3<sup>+</sup>
- GranzymeB<sup>+</sup>
- HLA-DR<sup>+</sup>
- HLA-DR<sup>+</sup>CD38<sup>+</sup>
- Ki67<sup>+</sup>
- PD-1<sup>+</sup>
- PD-1<sup>+</sup>TCF-1<sup>-</sup>
- TCF-1<sup>+</sup>
- T-bet<sup>+</sup> (Th1)
- CD161<sup>+</sup>CCR6<sup>+</sup> (Th17)

**CD8<sup>+</sup> T cell Phenotypes**

- CCR5<sup>+</sup>
- CCR6<sup>+</sup>
- CD45RA<sup>+/-</sup>/CCR7<sup>+/-</sup>
- CD38<sup>+</sup>
- CD39<sup>+</sup>
- CD69<sup>+</sup>
- CD101<sup>+</sup>
- CD69<sup>+/-</sup>CD103<sup>+/-</sup>
- CTLA-4<sup>+</sup>
- CXCR3<sup>+</sup>
- GranzymeB<sup>+</sup>
- HLA-DR<sup>+</sup>
- HLA-DR<sup>+</sup>CD38<sup>+</sup>
- Ki67<sup>+</sup>
- PD-1<sup>+</sup>
- PD-1<sup>+</sup>TCF-1<sup>-</sup>
- TCF-1<sup>+</sup>
- T-bet<sup>+</sup>
- CD161<sup>+</sup>CCR6<sup>+</sup>

**Treg Phenotypes**

- CCR5<sup>+</sup>
- CCR6<sup>+</sup>
- CD45RA<sup>+/-</sup>/CCR7<sup>+/-</sup>
- CD38<sup>+</sup>
- CD39<sup>+</sup>
- CD69<sup>+</sup>
- CD101<sup>+</sup>
- CD69<sup>+/-</sup>CD103<sup>+/-</sup>
- CTLA-4<sup>+</sup>
- CXCR3<sup>+</sup>
- GranzymeB<sup>+</sup>
- HLA-DR<sup>+</sup>
- HLA-DR<sup>+</sup>CD38<sup>+</sup>
- Ki67<sup>+</sup>
- PD-1<sup>+</sup>
- PD-1<sup>+</sup>TCF-1<sup>-</sup>
- TCF-1<sup>+</sup>
- T-bet<sup>+</sup>
- CD161<sup>+</sup>CCR6<sup>+</sup>

**Th17/Th1 Phenotypes**

- CCR5<sup>+</sup>
- CCR6<sup>+</sup>
- CD45RA<sup>+/-</sup>/CCR7<sup>+/-</sup>
- CD38<sup>+</sup>
- CD39<sup>+</sup>
- CD69<sup>+</sup>
- CD101<sup>+</sup>
- CD69<sup>+/-</sup>CD103<sup>+/-</sup>
- CTLA-4<sup>+</sup>
- CXCR3<sup>+</sup>
- GranzymeB<sup>+</sup>
- HLA-DR<sup>+</sup>
- HLA-DR<sup>+</sup>CD38<sup>+</sup>
- Ki67<sup>+</sup>
- PD-1<sup>+</sup>
- PD-1<sup>+</sup>TCF-1<sup>-</sup>
- TCF-1<sup>+</sup>
- T-bet<sup>+</sup> (of Th17)
- CD161<sup>+</sup>CCR6<sup>+</sup> (of Th1)

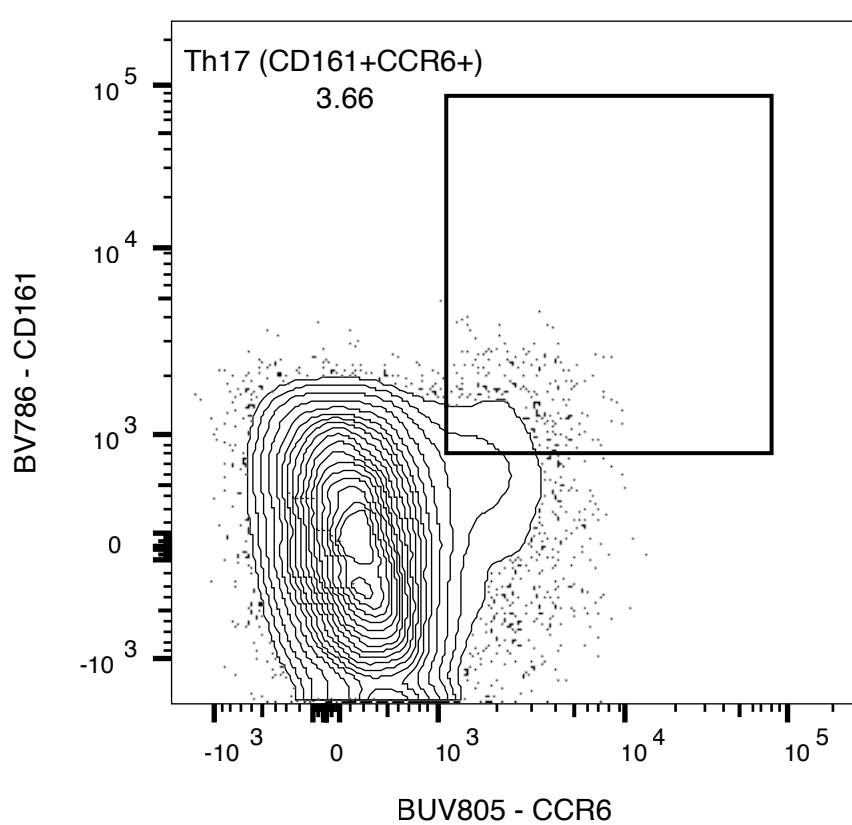

**Th17**

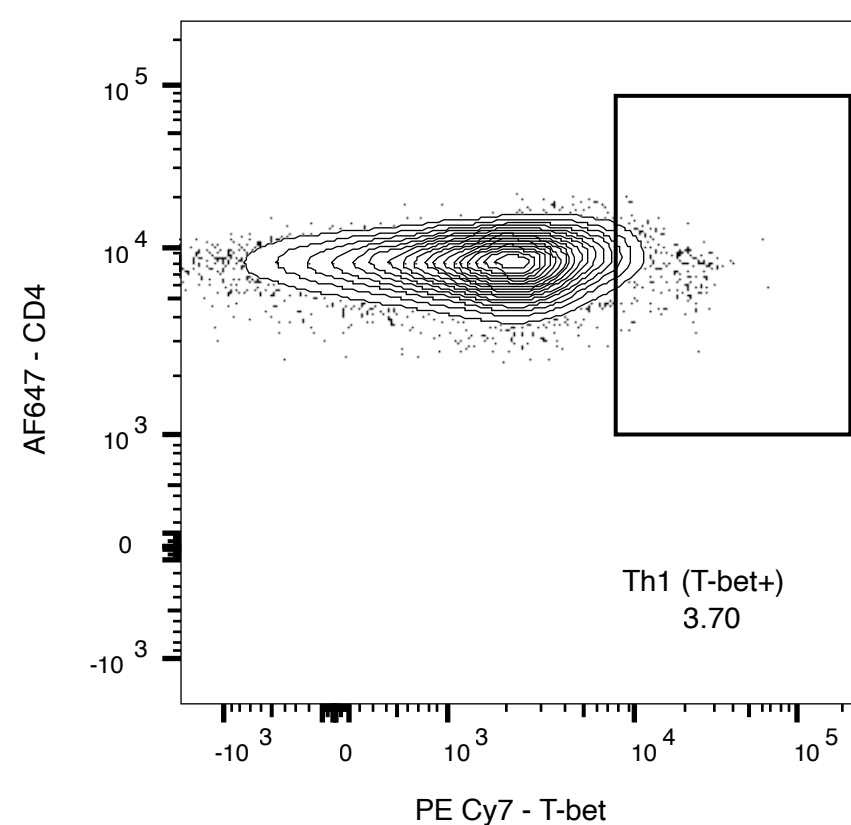

**Th1**
