# Supplementary material for: Bacterial vaginosis-driven changes in cervicovaginal immunity that expand the immunological hypothesis for increased HIV susceptibility
Source: PubMed Central journal article supplement — bioRxiv. 2025 Jan 14:2024.07.03.601916. Originally published 2024 Jul 5. Preprint. [Version 2] doi: 10.1101/2024.07.03.601916 (PMC11245000; doi:10.1101/2024.07.03.601916), 2025-01-14
Supplement: media-2.pdf [file media-2.pdf]

**Supplementary Table 1**

| T cell panel used for phenotyping |              |           |          |          |                |            |
|-----------------------------------|--------------|-----------|----------|----------|----------------|------------|
| Channel                           | Fluorochrome | Antibody  | Clone    | Dilution | Company        | Catalog #  |
| UV395                             | BUV395       | CD39      | TU66     | 1:40     | BD             | 742524     |
| UV450                             | BUV450       | Live/Dead |          | 1:1000   | Invitrogen     | L23105A    |
| UV500                             | BUV496       | CD8       | RPA-T8   | 1:500    | BD             | 612943     |
| UV570                             | BUV563       | CCR7      | 2-L1-A   | 1:40     | BD             | 749679     |
| UV660                             | BUV661       | CD3       | UCHT1    | 1:200    | BD             | 612964     |
| UV730                             | BUV737       | CD69      | FN50     | 1:50     | BD             | 612817     |
| UV780                             | BUV805       | CCR6      | 11A9     | 1:20     | BD             | 749361     |
| V510                              | BV510        | CCR5      | J418F1   | 1:166.7  | BioLegend      | 359128     |
| V570                              | BV570        | CD127     | A019-D5  | 1:83.3   | BioLegend      | 351308     |
| V610                              | BV605        | PD-1      | EH12.2H7 | 1:20     | BioLegend      | 329924     |
| V650                              | BV650        | CD25      | BC96     | 1:83.3   | BioLegend      | 302634     |
| V710                              | BV711        | CD38      | HIT2     | 1:40     | BD             | 563965     |
| V750                              | BV750        | CD103     | Ber-ACT8 | 1:250    | BD             | 747099     |
| V785                              | BV786        | CD161     | HP-3G10  | 1:83.3   | BD             | 748281     |
| B515                              | AF488        | HLA-DR    | 1.243    | 1:83.3   | BioLegend      | 307656     |
| B660                              | BB660        | SA        |          | 1:500    | BD             | 6464295    |
| B710                              | PerCpCy5.5   | CD45      | HI30     | 1:100    | BD             | 564105     |
| B780                              | BB790        | CD101     | V7.1     | 1:166.7  | BD             | Custom     |
| G575                              | PE           | TCF-1     | C63D9    | 1:40     | Cell Signaling | 14456      |
| G610                              | PE-CF594     | Foxp3     | 236A/E7  | 1:20     | BD             | 563955     |
| G660                              | PE Cy5       | CTLA4     | BNI3     | 1:166.7  | BD             | 561717     |
| G780                              | PE Cy7       | T-bet     | 4B10     | 1:20     | Invitrogen     | 25-5825-82 |
| R660                              | AF647        | CD4       | RPA-T4   | 1:40     | BD             | 557707     |
| R710                              | AF700        | GranzymeB | GB11     | 1:83.3   | BD             | 560213     |
| R780                              | APC-H7       | CD45RA    | HI100    | 1:40     | BD             | 560674     |
| B660                              | Biotin       | CXCR3     | G025H7   | 1:80     | BioLegend      | 353743     |
