# Supplementary material for: Bacterial vaginosis-driven changes in cervicovaginal immunity that expand the immunological hypothesis for increased HIV susceptibility
Source: PubMed Central journal article supplement — bioRxiv. 2025 Jan 14:2024.07.03.601916. Originally published 2024 Jul 5. Preprint. [Version 2] doi: 10.1101/2024.07.03.601916 (PMC11245000; doi:10.1101/2024.07.03.601916), 2025-01-14
Supplement: media-3.pdf [file media-3.pdf]

**Table S2.1****Vaginal Tract Lamina Propria**

| Group       | N  | CD3+ Mean<br>cells/mm2 | CD3+<br>Median<br>cells/mm2 | Wilcoxon<br>Rank Sum p-<br>value |
|-------------|----|------------------------|-----------------------------|----------------------------------|
| BV Negative | 55 | 851.0                  | 803.7                       | 0.274                            |
| BV Positive | 18 | 690.2                  | 744.2                       |                                  |

| Group       | N  | CD3+CD4+<br>Mean<br>cells/mm2 | CD3+CD4+<br>Median<br>cells/mm2 | Wilcoxon<br>Rank Sum p-<br>value |
|-------------|----|-------------------------------|---------------------------------|----------------------------------|
| BV Negative | 55 | 509.8                         | 444.0                           | 0.129                            |
| BV Positive | 18 | 270.9                         | 233.6                           |                                  |

| Group       | N  | CD3+CD4+C<br>CR5+ Mean<br>cells/mm2 | CD3+CD4+C<br>CR5+<br>Median<br>cells/mm2 | Wilcoxon<br>Rank Sum p-<br>value |
|-------------|----|-------------------------------------|------------------------------------------|----------------------------------|
| BV Negative | 55 | 289.3                               | 243.8                                    | 0.043                            |
| BV Positive | 18 | 176.8                               | 106.9                                    |                                  |

**Table S2.2****Vaginal Tract Epithelium**

| Group       | N  | CD3+ Mean<br>cells/mm2 | CD3+<br>Median<br>cells/mm2 | Wilcoxon<br>Rank Sum p-<br>value |
|-------------|----|------------------------|-----------------------------|----------------------------------|
| BV Negative | 55 | 608.3                  | 488.7                       | 0.659                            |
| BV Positive | 18 | 487.7                  | 434.5                       |                                  |

| Group       | N  | CD3+CD4+<br>Mean<br>cells/mm2 | CD3+CD4+<br>Median<br>cells/mm2 | Wilcoxon<br>Rank Sum p-<br>value |
|-------------|----|-------------------------------|---------------------------------|----------------------------------|
| BV Negative | 55 | 279.9                         | 147.3                           | 0.903                            |
| BV Positive | 18 | 172.8                         | 170.5                           |                                  |

| Group       | N  | CD3+CD4+C<br>CR5+ Mean<br>cells/mm2 | CD3+CD4+C<br>CR5+<br>Median<br>cells/mm2 | Wilcoxon<br>Rank Sum p-<br>value |
|-------------|----|-------------------------------------|------------------------------------------|----------------------------------|
| BV Negative | 55 | 158.5                               | 80.2                                     | 0.247                            |
| BV Positive | 18 | 74.1                                | 47.0                                     |                                  |

**Table S2.3**

| <b>Ectocervix Lamina Propria</b> |    |                                     |                                          |                                  |
|----------------------------------|----|-------------------------------------|------------------------------------------|----------------------------------|
|                                  |    |                                     | CD3+                                     | Wilcoxon                         |
| Group                            | N  | CD3+ Mean<br>cells/mm2              | Median<br>cells/mm2                      | Rank Sum p-<br>value             |
| BV Negative                      | 44 | 1074.5                              | 855.5                                    | 0.164                            |
| BV Positive                      | 16 | 752.5                               | 767.3                                    |                                  |
|                                  |    | CD3+CD4+<br>Mean<br>cells/mm2       | CD3+CD4+<br>Median<br>cells/mm2          | Wilcoxon<br>Rank Sum p-<br>value |
| BV Negative                      | 44 | 637.3                               | 505.2                                    | 0.241                            |
| BV Positive                      | 16 | 447.6                               | 449.2                                    |                                  |
|                                  |    | CD3+CD4+C<br>CR5+ Mean<br>cells/mm2 | CD3+CD4+C<br>CR5+<br>Median<br>cells/mm2 | Wilcoxon<br>Rank Sum p-<br>value |
| BV Negative                      | 44 | 436.4                               | 332.3                                    | 0.366                            |
| BV Positive                      | 16 | 282.9                               | 280.6                                    |                                  |

**Table S2.4**

| <b>Ectocervix Epithelium</b> |    |           |             |                           |
|------------------------------|----|-----------|-------------|---------------------------|
|                              |    | CD3+ Mean | CD3+ Median | Wilcoxon Rank Sum p-value |
| Group                        | N  | cells/mm2 | cells/mm2   |                           |
| BV Negative                  | 44 | 414.9     | 415.2       | 0.649                     |
| BV Positive                  | 16 | 387.0     | 333.9       |                           |

  

|             |    | CD3+CD4+ Mean | CD3+CD4+ Median | Wilcoxon Rank Sum p-value |
|-------------|----|---------------|-----------------|---------------------------|
| Group       |    | cells/mm2     | cells/mm2       |                           |
| BV Negative | 44 | 152.8         | 98.7            | 0.914                     |
| BV Positive | 16 | 162.9         | 99.3            |                           |

  

|             |    | CD3+CD4+C CR5+ Mean | CD3+CD4+C CR5+ Median | Wilcoxon Rank Sum p-value |
|-------------|----|---------------------|-----------------------|---------------------------|
| Group       |    | cells/mm2           | cells/mm2             |                           |
| BV Negative | 44 | 101.4               | 59.9                  | 0.810                     |
| BV Positive | 16 | 112.8               | 61.3                  |                           |
