# Supplementary material for: Bacterial vaginosis-driven changes in cervicovaginal immunity that expand the immunological hypothesis for increased HIV susceptibility
Source: PubMed Central journal article supplement — bioRxiv. 2025 Jan 14:2024.07.03.601916. Originally published 2024 Jul 5. Preprint. [Version 2] doi: 10.1101/2024.07.03.601916 (PMC11245000; doi:10.1101/2024.07.03.601916), 2025-01-14
Supplement: media-4.pdf [file media-4.pdf]

**Table S3.1**

**CD3 cells distribution for Vag Biopsy FBS/DMSO specimen comparing BV positive vs negative**

| Characteristic | Expected |         |     | BV          |          |     |
|----------------|----------|---------|-----|-------------|----------|-----|
|                | Max N    | Missing | N   | BV Positive | Negative |     |
| CD3-           | 197      |         | 3   | 194         | 60       | 134 |
| CD4_ofCD45     | 197      |         | 23  | 174         | 50       | 124 |
| Treg_of CD3    | 197      |         | 147 | 50          | 15       | 35  |
| Treg_of CD4    | 197      |         | 147 | 50          | 15       | 35  |
| Treg_ofCD45    | 197      |         | 147 | 50          | 15       | 35  |
| Tconv_of CD3   | 197      |         | 40  | 157         | 42       | 115 |
| Tconv_of CD45  | 197      |         | 40  | 157         | 42       | 115 |
| CD8_of CD45    | 197      |         | 25  | 172         | 49       | 123 |

**A regression model estimating the association of BV status (Positive vs Negative) with CD3 cells' concentration from Vag Biopsy FBS/DMSO specimen, adjusted for hormonal contraceptive use, semen exposure, HIV exposure, and HSV2 status**

| CD3 cells  | Overall           | BV                |                   | Unadjusted Beta | Unadjusted p-value | Adjusted Beta | Adjusted p-value |
|------------|-------------------|-------------------|-------------------|-----------------|--------------------|---------------|------------------|
|            |                   | Negative          | BV Positive       |                 |                    |               |                  |
| live CD45+ | 0.88 (0.30, 1.99) | 0.89 (0.36, 2.07) | 0.75 (0.13, 1.75) | -0.19           | 0.158              | -0.21         | 0.1762           |
| CD3+       | 78 (64, 88)       | 77 (63, 87)       | 83 (70, 89)       | 4.1             | 0.0878             | 4.87          | 0.0485           |
| CD3-       | 20 (11, 35)       | 22 (12, 35)       | 17 (11, 31)       | -3.15           | 0.1591             | -3.79         | 0.1019           |
| CD4_ofCD45 | 32 (22, 42)       | 34 (24, 42)       | 29 (22, 41)       | -3              | 0.24               | -2.77         | 0.3027           |

|               |                   |                   |                   |       |        |       |        |
|---------------|-------------------|-------------------|-------------------|-------|--------|-------|--------|
| Treg_of CD3   | 1.75 (1.04, 2.85) | 1.82 (1.18, 3.17) | 1.66 (0.95, 2.40) | -0.49 | 0.2534 | -0.57 | 0.0934 |
| Treg_of CD4   | 3.64 (2.01, 5.54) | 3.89 (2.23, 6.48) | 3.57 (1.83, 4.73) | -0.64 | 0.4261 | -0.79 | 0.2904 |
| Treg_of CD45  | 1.56 (0.90, 2.26) | 1.56 (0.99, 2.52) | 1.41 (0.81, 2.02) | -0.34 | 0.317  | -0.47 | 0.1427 |
| Tconv_of CD3  | 40 (29, 53)       | 44 (32, 54)       | 32 (24, 47)       | -7.3  | 0.0322 | -7.96 | 0.018  |
| Tconv_of CD45 | 30 (21, 39)       | 31 (22, 40)       | 27 (21, 36)       | -2.8  | 0.2631 | -2.86 | 0.2282 |
| CD8_of CD45   | 32 (21, 45)       | 30 (19, 42)       | 38 (25, 55)       | 8.5   | 0.0037 | 8.51  | 0.0041 |

**Table S3.2**

**CD3 cells distribution for EctoCx Biopsy FBS/DMSO specimen comparing BV positive vs negative**

| Characteristic | Expected |         | N   | BV Positive |    | BV Negative |  |
|----------------|----------|---------|-----|-------------|----|-------------|--|
|                | Max N    | Missing |     |             |    |             |  |
| CD3-           | 197      |         | 1   | 196         | 59 | 137         |  |
| CD4_ofCD45     | 197      |         | 19  | 178         | 52 | 126         |  |
| Treg_of CD3    | 197      |         | 140 | 57          | 16 | 41          |  |
| Treg_of CD4    | 197      |         | 140 | 57          | 16 | 41          |  |
| Treg_ofCD45    | 197      |         | 140 | 57          | 16 | 41          |  |
| Tconv_of CD3   | 197      |         | 31  | 166         | 47 | 119         |  |
| Tconv_of CD45  | 197      |         | 31  | 166         | 47 | 119         |  |
| CD8_of CD45    | 197      |         | 18  | 179         | 53 | 126         |  |

**A regression model estimating the association of BV status (Positive vs Negative) with CD3 cells' concentration from EctoCx Biopsy FBS/DMSO specimen, adjusted for hormonal contraceptive use, semen exposure, HIV exposure, and HSV2 status**

| CD3 cells  | Overall        | BV             |                | Unadjusted Beta | Unadjusted p-value | Adjusted Beta | Adjusted p-value |
|------------|----------------|----------------|----------------|-----------------|--------------------|---------------|------------------|
|            |                | Negative       | BV Positive    |                 |                    |               |                  |
| live CD45+ | 1.1 (0.3, 2.9) | 1.1 (0.3, 2.6) | 1.0 (0.2, 3.0) | 0               | 1                  | -0.02         | 0.9361           |
| CD3+       | 76 (67, 83)    | 77 (67, 83)    | 75 (68, 84)    | 0.3             | 0.8829             | 0.31          | 0.886            |
| CD3-       | 23 (16, 31)    | 23 (16, 32)    | 24 (15, 31)    | -0.3            | 0.8778             | -0.3          | 0.881            |
| CD4_ofCD45 | 38 (29, 45)    | 38 (29, 45)    | 39 (29, 45)    | 0.9             | 0.6813             | 0.74          | 0.7499           |

|               |                   |                   |                   |       |        |       |        |
|---------------|-------------------|-------------------|-------------------|-------|--------|-------|--------|
| Treg_of CD3   | 1.65 (1.16, 2.60) | 1.65 (1.11, 2.56) | 1.54 (1.17, 3.40) | 0.1   | 0.7601 | 0.03  | 0.946  |
| Treg_of CD4   | 3.09 (2.24, 5.38) | 3.09 (2.65, 4.86) | 2.94 (1.83, 6.74) | -0.19 | 0.7523 | -0.2  | 0.7809 |
| Treg_of CD45  | 1.30 (0.95, 2.19) | 1.29 (0.93, 1.99) | 1.34 (0.97, 2.55) | 0.1   | 0.7112 | 0.05  | 0.8837 |
| Tconv_of CD3  | 46 (35, 57)       | 47 (36, 55)       | 46 (35, 57)       | -0.1  | 0.971  | -0.2  | 0.948  |
| Tconv_of CD45 | 35 (26, 42)       | 35 (26, 42)       | 36 (26, 42)       | 0.6   | 0.768  | 0.36  | 0.8724 |
| CD8_of CD45   | 26 (19, 36)       | 27 (20, 38)       | 25 (18, 35)       | -2.2  | 0.3118 | -2.48 | 0.2919 |

**Table S3.3**

**CD3 cells distribution for PBMC ACD specimen comparing BV positive vs negative**

| Characteristic | Expected |         |  | N   | BV Positive | BV Negative |
|----------------|----------|---------|--|-----|-------------|-------------|
|                | Max N    | Missing |  |     |             |             |
| CD3-           | 200      | 0       |  | 200 | 60          | 140         |
| CD4_ofCD45     | 200      | 0       |  | 200 | 60          | 140         |
| Treg_of CD3    | 200      | 1       |  | 199 | 59          | 140         |
| Treg_of CD4    | 200      | 1       |  | 199 | 59          | 140         |
| Treg_ofCD45    | 200      | 1       |  | 199 | 59          | 140         |
| Tconv_of CD3   | 200      | 0       |  | 200 | 60          | 140         |
| Tconv_of CD45  | 200      | 0       |  | 200 | 60          | 140         |
| CD8_of CD45    | 200      | 0       |  | 200 | 60          | 140         |

**A regression model estimating the association of BV status (Positive vs Negative) with CD3 cells' concentration from PBMC ACD specimen, adjusted for hormonal contraceptive use**

| CD3 cells  | Overall     | BV          |             | Unadjusted Beta | Unadjusted p-value | Adjusted Beta | Adjusted p-value |
|------------|-------------|-------------|-------------|-----------------|--------------------|---------------|------------------|
|            |             | Negative    | BV Positive |                 |                    |               |                  |
| live CD45+ | 93 (90, 95) | 93 (91, 95) | 93 (87, 95) | -0.8            | 0.1411             | -0.6          | 0.2906           |
| CD3+       | 74 (67, 78) | 73 (67, 78) | 75 (68, 80) | 2.1             | 0.1137             | 1.9           | 0.1787           |
| CD3-       | 26 (21, 33) | 27 (22, 33) | 25 (19, 32) | -2.1            | 0.1063             | -1.9          | 0.1814           |
| CD4_ofCD45 | 45 (40, 50) | 45 (40, 50) | 45 (41, 50) | 0.7             | 0.5952             | 0.7           | 0.6028           |

|               |                   |                   |                   |      |        |       |        |
|---------------|-------------------|-------------------|-------------------|------|--------|-------|--------|
| Treg_of CD3   | 1.22 (0.95, 1.57) | 1.21 (0.94, 1.55) | 1.28 (0.99, 1.65) | 0.06 | 0.464  | 0.04  | 0.6378 |
| Treg_of CD4   | 1.99 (1.52, 2.53) | 1.95 (1.51, 2.46) | 2.04 (1.57, 2.61) | 0.11 | 0.4031 | 0.08  | 0.5821 |
| Treg_of CD45  | 0.89 (0.66, 1.18) | 0.88 (0.63, 1.12) | 0.97 (0.75, 1.22) | 0.07 | 0.2777 | 0.06  | 0.3751 |
| Tconv_of CD3  | 59 (55, 66)       | 59 (55, 66)       | 60 (55, 64)       | -0.6 | 0.6361 | -0.66 | 0.6261 |
| Tconv_of CD45 | 43 (38, 48)       | 43 (38, 48)       | 43 (39, 48)       | 0.6  | 0.6319 | 0.65  | 0.615  |
| CD8_of CD45   | 21.1 (17.6, 25.3) | 20.3 (17.5, 25.1) | 22.0 (17.9, 26.0) | 0.8  | 0.3869 | 0.8   | 0.4181 |

**Table S3.4**

**CD8+ T cells distribution for Vag Biopsy FBS/DMSO specimen comparing BV positive vs negative**

| Characteristic       | Expected |         | N   | BV Positive | BV Negative |
|----------------------|----------|---------|-----|-------------|-------------|
|                      | Max N    | Missing |     |             |             |
| CD8+ CD4-            | 191      | 16      | 175 | 50          | 125         |
| CCR5+ CD8+           | 175      | 18      | 157 | 45          | 112         |
| CCR6+ CD8+           | 175      | 19      | 156 | 45          | 111         |
| CCR7+<br>CD45RA+     | 175      | 19      | 156 | 45          | 111         |
| CCR7+<br>CD45RA-     | 175      | 19      | 156 | 45          | 111         |
| CCR7-<br>CD45RA+     | 175      | 19      | 156 | 45          | 111         |
| CCR7-<br>CD45RA-     | 175      | 19      | 156 | 45          | 111         |
| CD25+ CD8+           | 175      | 19      | 156 | 45          | 111         |
| CD38+ CD8+           | 175      | 19      | 156 | 45          | 111         |
| CD39+ CD8+           | 175      | 19      | 156 | 45          | 111         |
| CD101+<br>CD8+       | 175      | 19      | 156 | 45          | 111         |
| CD103+<br>CD69+ CD8+ | 175      | 19      | 156 | 45          | 111         |

|                          |     |     |     |    |     |
|--------------------------|-----|-----|-----|----|-----|
| CD103+ CD69-<br>CD8+     | 175 | 19  | 156 | 45 | 111 |
| CD103-<br>CD69+ CD8+     | 175 | 19  | 156 | 45 | 111 |
| CD103- CD69-<br>CD8+     | 175 | 19  | 156 | 45 | 111 |
| CD161+<br>CD8+           | 175 | 19  | 156 | 45 | 111 |
| CCR7+<br>CD45RA+<br>CD8+ | 156 | 39  | 117 | 36 | 81  |
| CCR7+<br>CD45RA-<br>CD8+ | 156 | 39  | 117 | 36 | 81  |
| CCR7-<br>CD45RA+<br>CD8+ | 156 | 39  | 117 | 36 | 81  |
| CCR7-<br>CD45RA-<br>CD8+ | 156 | 39  | 117 | 36 | 81  |
| CD161+<br>CCR6+ CD8+     | 175 | 19  | 156 | 45 | 111 |
| CCR7+<br>CD45RA+<br>CD8+ | 156 | 119 | 37  | 13 | 24  |
| CCR7+<br>CD45RA-<br>CD8+ | 156 | 119 | 37  | 13 | 24  |



|                          |     |     |     |    |     |
|--------------------------|-----|-----|-----|----|-----|
| CCR7-<br>CD45RA+<br>CD8+ | 156 | 119 | 37  | 13 | 24  |
| CCR7-<br>CD45RA-<br>CD8+ | 156 | 119 | 37  | 13 | 24  |
| CXCR3+<br>CD8+           | 175 | 19  | 156 | 45 | 111 |
| GrzB+ CD8+               | 175 | 19  | 156 | 45 | 111 |
| HLA-DR+<br>CD8+          | 175 | 19  | 156 | 45 | 111 |
| HLA-DR+<br>CD38+ CD8+    | 175 | 19  | 156 | 45 | 111 |
| Ki67+ CD8+               | 175 | 111 | 64  | 16 | 48  |
| PD-1+ CD8+               | 175 | 19  | 156 | 45 | 111 |
| PD-1+ TCF-1-<br>CD8+     | 175 | 19  | 156 | 45 | 111 |
| Tbet+ CD8+               | 175 | 19  | 156 | 45 | 111 |
| TCF1+ CD8+               | 175 | 19  | 156 | 45 | 111 |

**A regression model estimating the association of BV status (Positive vs Negative) with CD8+ T cells' concentration from Vag Biopsy FBS/DMSO specimen, adjusted for hormonal contraceptive use, semen exposure, HIV exposure, and HSV2 status**

|                        | Overall     | BV<br>Negative | BV Positive | Unadjusted<br>Beta | Unadjusted p-<br>value | Adjusted<br>Beta | Adjusted<br>p-value |
|------------------------|-------------|----------------|-------------|--------------------|------------------------|------------------|---------------------|
| CD8 cells<br>CD8+ CD4- | 40 (31, 56) | 38 (28, 54)    | 44 (35, 63) | 7.89               | 0.0109                 | 8.43             | 0.0075              |
| CCR5+ CD8+             | 86 (65, 94) | 85 (59, 94)    | 87 (76, 95) | 2.8                | 0.2372                 | 2.65             | 0.293               |

|                    |                   |                   |                   |       |        |       |        |
|--------------------|-------------------|-------------------|-------------------|-------|--------|-------|--------|
| CCR6+ CD8+         | 4.9 (2.4, 7.8)    | 5.2 (3.1, 7.8)    | 4.1 (2.2, 6.4)    | -0.79 | 0.2232 | -0.71 | 0.3104 |
| CCR7+ CD45RA+ CD8+ | 5 (2, 15)         | 5 (2, 16)         | 5 (2, 12)         | -0.35 | 0.718  | -0.26 | 0.8133 |
| CCR7+ CD45RA- CD8+ | 9 (5, 14)         | 9 (6, 13)         | 9 (5, 16)         | 0.34  | 0.7391 | 0.53  | 0.6354 |
| CCR7- CD45RA+ CD8+ | 21 (11, 30)       | 22 (11, 31)       | 18 (11, 28)       | -1.8  | 0.466  | -1.92 | 0.4559 |
| CCR7- CD45RA- CD8+ | 59 (43, 73)       | 57 (43, 72)       | 61 (43, 76)       | 2.9   | 0.4631 | 3.35  | 0.4124 |
| CD25+ CD8+         | 0.9 (0.2, 2.7)    | 1.1 (0.3, 2.7)    | 0.7 (0.0, 2.9)    | -0.13 | 0.5192 | -0.18 | 0.4349 |
| CD38+ CD8+         | 3.9 (1.5, 8.2)    | 4.8 (1.6, 8.2)    | 2.1 (1.1, 7.5)    | -1.04 | 0.131  | -1.09 | 0.1273 |
| CD39+ CD8+         | 7 (3, 16)         | 7 (2, 17)         | 9 (3, 15)         | 0.79  | 0.5291 | 1.06  | 0.4582 |
| CD101+ CD8+        | 54 (34, 72)       | 52 (31, 70)       | 61 (44, 75)       | 6.8   | 0.1258 | 6.73  | 0.1446 |
| CD103+ CD69+ CD8+  | 64 (32, 80)       | 62 (29, 77)       | 69 (43, 83)       | 6.2   | 0.1824 | 7.72  | 0.1149 |
| CD103+ CD69- CD8+  | 0.94 (0.33, 2.05) | 0.92 (0.35, 2.32) | 0.97 (0.34, 1.54) | 0     | 1      | -0.09 | 0.6368 |
| CD103- CD69+ CD8+  | 11 (5, 20)        | 11 (5, 22)        | 11 (6, 18)        | -0.41 | 0.807  | -0.6  | 0.7188 |
| CD103- CD69- CD8+  | 14 (5, 53)        | 19 (5, 54)        | 12 (5, 26)        | -3.18 | 0.2812 | -3.93 | 0.215  |
| CD161+ CD8+        | 30 (21, 40)       | 29 (20, 41)       | 32 (25, 39)       | 1.5   | 0.582  | 3.4   | 0.1979 |

|                                             |                   |                   |                   |       |        |       |        |
|---------------------------------------------|-------------------|-------------------|-------------------|-------|--------|-------|--------|
| CD161+CCR7<br>+ CD45RA+<br>CD8+             | 3 (1, 7)          | 3 (1, 7)          | 3 (1, 7)          | 0     | 1      | 0.13  | 0.8703 |
| CD161+CCR7<br>+ CD45RA-<br>CD8+             | 10 (6, 19)        | 10 (5, 16)        | 14 (7, 21)        | 2.88  | 0.0979 | 3.58  | 0.0441 |
| CD161+CCR7-<br>CD45RA+<br>CD8+              | 14 (6, 23)        | 16 (6, 25)        | 13 (7, 19)        | -1.05 | 0.6253 | -1.46 | 0.4833 |
| CD161+CCR7-<br>CD45RA-<br>CD8+              | 67 (55, 80)       | 67 (56, 81)       | 68 (54, 78)       | -0.5  | 0.8837 | 0.11  | 0.9757 |
| CD161+<br>CCR6+ CD8+                        | 4.0 (1.9,<br>6.9) | 4.1 (1.9,<br>6.6) | 3.8 (2.1,<br>7.5) | 0.24  | 0.6612 | 0.29  | 0.6202 |
| CD161+<br>CCR6+<br>CCR7+<br>CD45RA+<br>CD8+ | 3.1 (0.9,<br>7.3) | 1.6 (0.0,<br>7.2) | 4.8 (3.0,<br>8.1) | 2.5   | 0.0275 | 2.31  | 0.0781 |
| CD161+<br>CCR6+<br>CCR7+<br>CD45RA-<br>CD8+ | 21 (10, 32)       | 18 (9, 31)        | 23 (19, 32)       | 7.3   | 0.2104 | 10.87 | 0.0587 |
| CD161+<br>CCR6+ CCR7-<br>CD45RA+<br>CD8+    | 6 (3, 12)         | 6 (3, 13)         | 7 (3, 12)         | 1.14  | 0.6813 | -1.45 | 0.6487 |

|              |             |             |             |        |        |       |        |
|--------------|-------------|-------------|-------------|--------|--------|-------|--------|
| CD161+       |             |             |             |        |        |       |        |
| CCR6+ CCR7-  |             |             |             |        |        |       |        |
| CD45RA-      |             |             |             |        |        |       |        |
| CD8+         | 62 (46, 78) | 66 (54, 79) | 55 (39, 68) | -11.01 | 0.1315 | -8.69 | 0.2353 |
| CXCR3+       |             |             |             |        |        |       |        |
| CD8+         | 82 (55, 90) | 82 (54, 89) | 84 (58, 93) | 3.5    | 0.2365 | 3.48  | 0.2812 |
| GrzB+ CD8+   | 19 (10, 30) | 21 (12, 30) | 18 (8, 25)  | -3     | 0.1913 | -2.48 | 0.3051 |
| HLA-DR+      |             |             |             |        |        |       |        |
| CD8+         | 25 (16, 37) | 25 (17, 38) | 23 (13, 32) | -4.3   | 0.1159 | -4.78 | 0.1088 |
| HLA-DR+      | 1.7 (0.6,   | 2.0 (0.7,   | 0.9 (0.0,   |        |        |       |        |
| CD38+ CD8+   | 4.6)        | 5.0)        | 3.3)        | -0.68  | 0.059  | -0.92 | 0.0309 |
| Ki67+ CD8+   | 4 (2, 6)    | 4 (2, 6)    | 5 (3, 7)    | 0.7    | 0.4776 | 0.81  | 0.3798 |
| PD-1+ CD8+   | 47 (28, 60) | 46 (26, 59) | 50 (35, 63) | 6.4    | 0.116  | 5.95  | 0.1865 |
| PD-1+ TCF-1- |             |             |             |        |        |       |        |
| CD8+         | 36 (22, 48) | 36 (20, 49) | 35 (28, 46) | 0.5    | 0.8903 | -0.23 | 0.9535 |
| Tbet+ CD8+   | 14 (6, 23)  | 15 (7, 22)  | 12 (5, 26)  | -0.4   | 0.8399 | -0.77 | 0.7208 |
| TCF1+ CD8+   | 25 (14, 39) | 25 (13, 39) | 24 (16, 36) | -0.2   | 0.946  | -0.37 | 0.9046 |

**Table S3.5**

**CD8+ T cells distribution for EctoCx Biopsy FBS/DMSO specimen comparing BV positive vs negative**

| Characteristic       | Expected |         |     | BV Positive | BV Negative |
|----------------------|----------|---------|-----|-------------|-------------|
|                      | Max N    | Missing | N   |             |             |
| CD8+ CD4-            | 194      | 14      | 180 | 53          | 127         |
| CCR5+ CD8+           | 180      | 19      | 161 | 46          | 115         |
| CCR6+ CD8+           | 180      | 19      | 161 | 46          | 115         |
| CCR7+<br>CD45RA+     | 180      | 19      | 161 | 46          | 115         |
| CCR7+<br>CD45RA-     | 180      | 19      | 161 | 46          | 115         |
| CCR7-<br>CD45RA+     | 180      | 19      | 161 | 46          | 115         |
| CCR7-<br>CD45RA-     | 180      | 19      | 161 | 46          | 115         |
| CD25+ CD8+           | 180      | 19      | 161 | 46          | 115         |
| CD38+ CD8+           | 180      | 19      | 161 | 46          | 115         |
| CD39+ CD8+           | 180      | 19      | 161 | 46          | 115         |
| CD101+ CD8+          | 180      | 19      | 161 | 46          | 115         |
| CD103+<br>CD69+ CD8+ | 180      | 19      | 161 | 46          | 115         |

|                          |     |     |     |    |     |
|--------------------------|-----|-----|-----|----|-----|
| CD103+ CD69-<br>CD8+     | 180 | 19  | 161 | 46 | 115 |
| CD103-<br>CD69+ CD8+     | 180 | 19  | 161 | 46 | 115 |
| CD103- CD69-<br>CD8+     | 180 | 19  | 161 | 46 | 115 |
| CD161+ CD8+              | 180 | 19  | 161 | 46 | 115 |
| CCR7+<br>CD45RA+<br>CD8+ | 161 | 54  | 107 | 34 | 73  |
| CCR7+<br>CD45RA-<br>CD8+ | 161 | 54  | 107 | 34 | 73  |
| CCR7-<br>CD45RA+<br>CD8+ | 161 | 54  | 107 | 34 | 73  |
| CCR7-<br>CD45RA-<br>CD8+ | 161 | 54  | 107 | 34 | 73  |
| CD161+<br>CCR6+ CD8+     | 180 | 20  | 160 | 46 | 114 |
| CCR7+<br>CD45RA+<br>CD8+ | 160 | 126 | 34  | 12 | 22  |
| CCR7+<br>CD45RA-<br>CD8+ | 160 | 126 | 34  | 12 | 22  |
| CCR7-<br>CD45RA+<br>CD8+ | 160 | 126 | 34  | 12 | 22  |

|                          |     |     |     |    |     |
|--------------------------|-----|-----|-----|----|-----|
| CCR7-<br>CD45RA-<br>CD8+ | 160 | 126 | 34  | 12 | 22  |
| CXCR3+<br>CD8+           | 180 | 19  | 161 | 46 | 115 |
| GrzB+ CD8+               | 180 | 19  | 161 | 46 | 115 |
| HLA-DR+<br>CD8+          | 180 | 19  | 161 | 46 | 115 |
| HLA-DR+<br>CD38+ CD8+    | 180 | 19  | 161 | 46 | 115 |
| Ki67+ CD8+               | 180 | 115 | 65  | 15 | 50  |
| PD-1+ CD8+               | 180 | 19  | 161 | 46 | 115 |
| PD-1+ TCF-1-<br>CD8+     | 180 | 19  | 161 | 46 | 115 |
| Tbet+ CD8+               | 180 | 19  | 161 | 46 | 115 |
| TCF1+ CD8+               | 180 | 19  | 161 | 46 | 115 |

**A regression model estimating the association of BV status (Positive vs Negative) with CD8+ T cells' concentration from EctoCx Biopsy FBS/DMSO specimen, adjusted for hormonal contraceptive use, semen exposure, HIV exposure, and HSV2 status**

|                          |                | BV             |                | Unadjusted | Unadjusted | Adjusted | Adjusted |
|--------------------------|----------------|----------------|----------------|------------|------------|----------|----------|
|                          | Overall        | Negative       | BV Positive    | Beta       | p-value    | Beta     | p-value  |
| CD8+ cells               |                |                |                |            |            |          |          |
| CD8+ CD4-                | 36 (27, 48)    | 38 (28, 48)    | 35 (26, 42)    | -3.2       | 0.2086     | -3.58    | 0.1814   |
| CCR5+ CD8+               | 78 (45, 92)    | 78 (48, 91)    | 80 (41, 94)    | 2.3        | 0.4869     | 1.98     | 0.5802   |
| CCR6+ CD8+               | 4.7 (2.4, 8.0) | 4.8 (2.7, 7.9) | 3.5 (1.8, 8.0) | -0.71      | 0.2569     | -1       | 0.1515   |
| CCR7+<br>CD45RA+<br>CD8+ | 9 (3, 28)      | 9 (4, 26)      | 6 (2, 27)      | -1.72      | 0.2804     | -1.78    | 0.2926   |

|                                 |                   |                   |                   |       |        |       |        |
|---------------------------------|-------------------|-------------------|-------------------|-------|--------|-------|--------|
| CCR7+<br>CD45RA-<br>CD8+        | 9 (6, 13)         | 8 (6, 13)         | 9 (5, 12)         | -0.31 | 0.7439 | 0.11  | 0.9128 |
| CCR7-<br>CD45RA+<br>CD8+        | 22 (14, 30)       | 23 (15, 30)       | 22 (13, 27)       | -1.4  | 0.5027 | -1.67 | 0.4719 |
| CCR7-<br>CD45RA-<br>CD8+        | 53 (35, 68)       | 53 (35, 66)       | 56 (35, 73)       | 4.1   | 0.3064 | 3.95  | 0.356  |
| CD25+ CD8+                      | 1.0 (0.1, 2.4)    | 1.1 (0.1, 2.5)    | 0.9 (0.3, 2.0)    | 0     | 1      | -0.04 | 0.8477 |
| CD38+ CD8+                      | 10 (5, 16)        | 10 (4, 15)        | 10 (5, 17)        | -0.1  | 0.9408 | 0.1   | 0.9417 |
| CD39+ CD8+                      | 8 (3, 15)         | 8 (3, 15)         | 8 (3, 15)         | -0.19 | 0.8718 | -1.3  | 0.316  |
| CD101+ CD8+                     | 47 (30, 67)       | 45 (27, 65)       | 50 (33, 68)       | 4.8   | 0.2867 | 4.65  | 0.3096 |
| CD103+<br>CD69+ CD8+            | 41 (20, 62)       | 40 (20, 62)       | 43 (16, 62)       | 0.08  | 0.9866 | 0.81  | 0.8799 |
| CD103+ CD69-<br>CD8+            | 1.03 (0.28, 2.56) | 0.89 (0.19, 2.48) | 1.26 (0.50, 2.69) | 0.34  | 0.1093 | 0.28  | 0.2094 |
| CD103-<br>CD69+ CD8+            | 15 (6, 26)        | 14 (5, 27)        | 15 (7, 26)        | 0.2   | 0.9277 | 0.77  | 0.7459 |
| CD103- CD69-<br>CD8+            | 28 (9, 70)        | 31 (9, 70)        | 22 (9, 69)        | -0.64 | 0.8747 | -0.85 | 0.8501 |
| CD161+ CD8+                     | 26 (17, 37)       | 26 (17, 39)       | 28 (17, 37)       | -0.8  | 0.7511 | 0.7   | 0.7952 |
| CD161+CCR7<br>+ CD45RA+<br>CD8+ | 5 (2, 16)         | 6 (2, 14)         | 4 (2, 22)         | -0.36 | 0.7727 | -0.53 | 0.6999 |
| CD161+CCR7<br>+ CD45RA-<br>CD8+ | 10 (6, 15)        | 10 (7, 15)        | 9 (6, 15)         | -0.9  | 0.4937 | -0.17 | 0.9054 |



|                                             |                 |                |                 |       |        |       |        |
|---------------------------------------------|-----------------|----------------|-----------------|-------|--------|-------|--------|
| CD161+CCR7-<br>CD45RA+<br>CD8+              | 16 (8, 24)      | 18 (10, 23)    | 14 (7, 26)      | -2.01 | 0.3775 | -2.31 | 0.3335 |
| CD161+CCR7-<br>CD45RA-<br>CD8+              | 62 (45, 73)     | 61 (44, 71)    | 65 (46, 75)     | 3.4   | 0.4159 | 3.75  | 0.4043 |
| CD161+<br>CCR6+ CD8+                        | 3.0 (1.8, 6.0)  | 3.2 (2.0, 6.0) | 2.3 (1.1, 5.9)  | -0.75 | 0.086  | -0.94 | 0.057  |
| CD161+<br>CCR6+<br>CCR7+<br>CD45RA+<br>CD8+ | 4.1 (1.7, 10.0) | 4.1 (2.7, 6.7) | 5.5 (1.0, 11.6) | 0.56  | 0.7848 | 3.91  | 0.185  |
| CD161+<br>CCR6+<br>CCR7+<br>CD45RA-<br>CD8+ | 15 (10, 31)     | 12 (10, 32)    | 18 (14, 27)     | 3.73  | 0.4388 | 0.56  | 0.9352 |
| CD161+<br>CCR6+ CCR7-<br>CD45RA+<br>CD8+    | 10 (2, 17)      | 9 (1, 16)      | 12 (5, 17)      | 1.4   | 0.6519 | 6.25  | 0.128  |
| CD161+<br>CCR6+ CCR7-<br>CD45RA-<br>CD8+    | 63 (49, 75)     | 61 (54, 77)    | 65 (46, 71)     | -4.18 | 0.6001 | -4.41 | 0.66   |
| CXCR3+<br>CD8+                              | 72 (51, 86)     | 72 (55, 85)    | 72 (47, 88)     | -1    | 0.7923 | -0.43 | 0.9175 |
| GrzB+ CD8+                                  | 24 (16, 34)     | 24 (16, 33)    | 25 (18, 36)     | 2     | 0.4149 | 2.91  | 0.2817 |
| HLA-DR+<br>CD8+                             | 33 (20, 47)     | 33 (20, 48)    | 29 (21, 45)     | -0.7  | 0.8277 | -1.2  | 0.728  |

|              |             |             |             |       |        |       |        |  |
|--------------|-------------|-------------|-------------|-------|--------|-------|--------|--|
| HLA-DR+      |             |             |             |       |        |       |        |  |
| CD38+ CD8+   | 4 (2, 9)    | 4 (3, 9)    | 4 (2, 8)    | -0.85 | 0.2239 | -0.78 | 0.2893 |  |
|              | 3.4 (1.7,   | 3.4 (1.6,   | 3.8 (2.1,   |       |        |       |        |  |
| Ki67+ CD8+   | 6.6)        | 6.4)        | 7.1)        | 0.41  | 0.6721 | -0.82 | 0.2319 |  |
| PD-1+ CD8+   | 39 (20, 57) | 38 (20, 58) | 42 (22, 55) | -0.1  | 0.98   | 0.91  | 0.83   |  |
| PD-1+ TCF-1- |             |             |             |       |        |       |        |  |
| CD8+         | 31 (15, 49) | 31 (15, 50) | 30 (14, 48) | -2.5  | 0.4713 | -1.79 | 0.6218 |  |
| Tbet+ CD8+   | 17 (8, 31)  | 17 (9, 29)  | 18 (7, 33)  | 0.7   | 0.7688 | 1.21  | 0.6506 |  |
| TCF1+ CD8+   | 29 (14, 43) | 28 (14, 42) | 32 (19, 47) | 3.7   | 0.2543 | 4.34  | 0.2462 |  |

**Table S3.6**

**CD8+ T cells distribution for PBMC ACD specimen comparing BV positive vs negative**

| Characteristic       | Expected |         |  | N   | BV Positive | BV Negative |
|----------------------|----------|---------|--|-----|-------------|-------------|
|                      | Max N    | Missing |  |     |             |             |
| CD8+ CD4-            | 200      | 0       |  | 200 | 60          | 140         |
| CCR5+ CD8+           | 200      | 0       |  | 200 | 60          | 140         |
| CCR6+ CD8+           | 200      | 0       |  | 200 | 60          | 140         |
| CCR7+<br>CD45RA+     |          |         |  |     |             |             |
| CD8+                 | 200      | 0       |  | 200 | 60          | 140         |
| CCR7+<br>CD45RA-     |          |         |  |     |             |             |
| CD8+                 | 200      | 0       |  | 200 | 60          | 140         |
| CCR7-<br>CD45RA+     |          |         |  |     |             |             |
| CD8+                 | 200      | 0       |  | 200 | 60          | 140         |
| CCR7-<br>CD45RA-     |          |         |  |     |             |             |
| CD8+                 | 200      | 0       |  | 200 | 60          | 140         |
| CD25+ CD8+           | 200      | 0       |  | 200 | 60          | 140         |
| CD38+ CD8+           | 200      | 0       |  | 200 | 60          | 140         |
| CD39+ CD8+           | 200      | 0       |  | 200 | 60          | 140         |
| CD101+ CD8+          | 200      | 0       |  | 200 | 60          | 140         |
| CD103+<br>CD69+ CD8+ | 200      | 0       |  | 200 | 60          | 140         |

|                          |     |   |     |    |     |
|--------------------------|-----|---|-----|----|-----|
| CD103+ CD69-<br>CD8+     | 200 | 0 | 200 | 60 | 140 |
| CD103-<br>CD69+ CD8+     | 200 | 0 | 200 | 60 | 140 |
| CD103- CD69-<br>CD8+     | 200 | 0 | 200 | 60 | 140 |
| CD161+ CD8+              | 200 | 0 | 200 | 60 | 140 |
| CCR7+<br>CD45RA+<br>CD8+ | 200 | 0 | 200 | 60 | 140 |
| CCR7+<br>CD45RA-<br>CD8+ | 200 | 0 | 200 | 60 | 140 |
| CCR7-<br>CD45RA+<br>CD8+ | 200 | 0 | 200 | 60 | 140 |
| CCR7-<br>CD45RA-<br>CD8+ | 200 | 0 | 200 | 60 | 140 |
| CD161+<br>CCR6+ CD8+     | 200 | 0 | 200 | 60 | 140 |
| CCR7+<br>CD45RA+<br>CD8+ | 200 | 0 | 200 | 60 | 140 |
| CCR7+<br>CD45RA-<br>CD8+ | 200 | 0 | 200 | 60 | 140 |
| CCR7-<br>CD45RA+<br>CD8+ | 200 | 0 | 200 | 60 | 140 |

|                          |     |     |     |    |     |
|--------------------------|-----|-----|-----|----|-----|
| CCR7-<br>CD45RA-<br>CD8+ | 200 | 0   | 200 | 60 | 140 |
| CXCR3+<br>CD8+           | 200 | 0   | 200 | 60 | 140 |
| GrzB+ CD8+               | 200 | 0   | 200 | 60 | 140 |
| HLA-DR+<br>CD8+          | 200 | 0   | 200 | 60 | 140 |
| HLA-DR+<br>CD38+ CD8+    | 200 | 0   | 200 | 60 | 140 |
| Ki67+ CD8+               | 200 | 120 | 80  | 22 | 58  |
| PD-1+ CD8+               | 200 | 0   | 200 | 60 | 140 |
| PD-1+ TCF-1-<br>CD8+     | 200 | 0   | 200 | 60 | 140 |
| Tbet+ CD8+               | 200 | 0   | 200 | 60 | 140 |
| TCF1+ CD8+               | 200 | 0   | 200 | 60 | 140 |

**A regression model estimating the association of BV status (Positive vs Negative) with CD8+ T cells' concentration from PBMC ACD specimen, adjusted for hormonal contraceptive use**

| CD8_cells                | Overall           | BV                |                   | Unadjusted |         | Adjusted      |         |
|--------------------------|-------------------|-------------------|-------------------|------------|---------|---------------|---------|
|                          |                   | Negative          | BV Positive       | Beta       | p-value | Adjusted Beta | p-value |
| CD8+ CD4-                | 30 (25, 35)       | 30 (25, 35)       | 30 (25, 34)       | 0.3        | 0.7841  | 0.4           | 0.7249  |
| CCR5+ CD8+               | 23 (15, 32)       | 22 (15, 31)       | 26 (16, 34)       | 2.7        | 0.1417  | 2.6           | 0.1878  |
| CCR6+ CD8+               | 2.36 (1.46, 3.54) | 2.56 (1.49, 3.72) | 2.27 (1.36, 3.16) | -0.27      | 0.2365  | -0.32         | 0.1928  |
| CCR7+<br>CD45RA+<br>CD8+ | 40 (31, 52)       | 40 (31, 50)       | 42 (31, 53)       | 2.5        | 0.3146  | 2.4           | 0.3453  |

|                                 |                            |                            |                            |       |        |       |        |
|---------------------------------|----------------------------|----------------------------|----------------------------|-------|--------|-------|--------|
| CCR7+<br>CD45RA-<br>CD8+        | 4.1 (2.5,<br>6.0)          | 4.1 (2.5,<br>6.0)          | 3.8 (2.5,<br>6.1)          | 0.01  | 0.9781 | 0.04  | 0.9281 |
| CCR7-<br>CD45RA+<br>CD8+        | 33 (25, 41)                | 33 (26, 41)                | 32 (24, 42)                | -0.4  | 0.8417 | -0.5  | 0.8059 |
| CCR7-<br>CD45RA-<br>CD8+        | 18 (14, 25)                | 18 (14, 27)                | 19 (14, 23)                | -1.3  | 0.3527 | -1.4  | 0.3663 |
| CD25+ CD8+                      | 0.06 (0.02,<br>0.25)       | 0.07 (0.02,<br>0.25)       | 0.05 (0.02,<br>0.21)       | 0     | 0.8899 | 0     | 0.7499 |
| CD38+ CD8+                      | 8.3 (4.7,<br>11.8)         | 7.8 (4.9,<br>11.4)         | 8.6 (4.2,<br>13.3)         | 0.4   | 0.5813 | 0.84  | 0.2629 |
| CD39+ CD8+                      | 1.29 (0.75,<br>1.89)       | 1.26 (0.75,<br>1.82)       | 1.38 (0.76,<br>1.93)       | 0.11  | 0.3974 | 0.1   | 0.4378 |
| CD101+ CD8+                     | 29 (18, 42)                | 29 (17, 39)                | 30 (18, 46)                | 2.3   | 0.3957 | 2.6   | 0.3338 |
| CD103+<br>CD69+ CD8+            | 0.05 (0.03,<br>0.09)       | 0.06 (0.03,<br>0.09)       | 0.05 (0.03,<br>0.09)       | 0     | 0.4159 | -0.01 | 0.2747 |
| CD103+ CD69-<br>CD8+            | 1.99 (1.38,<br>2.77)       | 2.07 (1.43,<br>2.77)       | 1.84 (1.29,<br>2.57)       | -0.2  | 0.2051 | -0.2  | 0.2092 |
| CD103-<br>CD69+ CD8+            | 1.23 (0.84,<br>1.73)       | 1.25 (0.88,<br>1.70)       | 1.14 (0.76,<br>1.77)       | -0.08 | 0.4262 | -0.12 | 0.2313 |
| CD103- CD69-<br>CD8+            | 96.50<br>(95.58,<br>97.40) | 96.40<br>(95.50,<br>97.30) | 96.75<br>(95.78,<br>97.63) | 0.3   | 0.278  | 0.35  | 0.1304 |
| CD161+ CD8+                     | 13 (9, 20)                 | 13 (9, 21)                 | 14 (8, 17)                 | -0.97 | 0.4512 | -0.42 | 0.7411 |
| CD161+CCR7<br>+ CD45RA+<br>CD8+ | 40 (29, 54)                | 39 (28, 52)                | 42 (30, 57)                | 2.36  | 0.3952 | 3.35  | 0.2162 |

|                                         |                      |                      |                      |       |        |       |        |
|-----------------------------------------|----------------------|----------------------|----------------------|-------|--------|-------|--------|
| CD161+CCR7<br>+ CD45RA-<br>CD8+         | 5.1 (2.9,<br>7.6)    | 5.2 (3.2,<br>7.8)    | 4.5 (2.6,<br>7.1)    | -0.73 | 0.1502 | -0.55 | 0.2935 |
| CD161+CCR7-<br>CD45RA+<br>CD8+          | 25 (18, 34)          | 25 (18, 34)          | 26 (18, 35)          | 1     | 0.5973 | 0.4   | 0.83   |
| CD161+CCR7-<br>CD45RA-<br>CD8+          | 24 (16, 34)          | 25 (17, 34)          | 21 (14, 30)          | -2.6  | 0.1781 | -3.35 | 0.1008 |
| CD161+<br>CCR6+ CD8+                    | 1.19 (0.71,<br>2.19) | 1.11 (0.72,<br>2.29) | 1.35 (0.71,<br>1.99) | 0.02  | 0.8764 | 0.02  | 0.882  |
| CD161+<br>CCR6+CCR7+<br>CD45RA+<br>CD8+ | 13 (7, 25)           | 13 (6, 24)           | 14 (8, 26)           | 1.87  | 0.2503 | 2.02  | 0.2309 |
| CD161+<br>CCR6+CCR7+<br>CD45RA-<br>CD8+ | 9 (6, 14)            | 9 (6, 14)            | 9 (5, 14)            | 0.2   | 0.8261 | 0.4   | 0.6746 |
| CD161+<br>CCR6+CCR7-<br>CD45RA+<br>CD8+ | 13 (8, 21)           | 13 (7, 22)           | 15 (9, 18)           | 0.97  | 0.4714 | 0.86  | 0.5346 |
| CD161+<br>CCR6+CCR7-<br>CD45RA-<br>CD8+ | 57 (43, 70)          | 57 (45, 71)          | 57 (40, 66)          | -2.9  | 0.3432 | -3.26 | 0.2955 |
| CXCR3+<br>CD8+                          | 50 (26, 64)          | 49 (28, 63)          | 50 (12, 67)          | -1.7  | 0.6499 | -3.03 | 0.4241 |
| GrzB+ CD8+                              | 34 (21, 44)          | 34 (21, 45)          | 33 (22, 42)          | -1.4  | 0.5748 | -1    | 0.7095 |

|              |             |             |             |       |        |       |        |  |
|--------------|-------------|-------------|-------------|-------|--------|-------|--------|--|
| HLA-DR+      |             |             |             |       |        |       |        |  |
| CD8+         | 18 (12, 25) | 17 (12, 25) | 18 (14, 25) | 0.9   | 0.5333 | 0.5   | 0.7211 |  |
| HLA-DR+      | 2.66 (1.70, | 2.58 (1.72, | 2.78 (1.61, |       |        |       |        |  |
| CD38+ CD8+   | 3.89)       | 3.49)       | 4.65)       | 0.32  | 0.1884 | 0.34  | 0.1645 |  |
|              | 0.69 (0.44, | 0.74 (0.44, | 0.63 (0.49, |       |        |       |        |  |
| Ki67+ CD8+   | 1.08)       | 1.09)       | 0.96)       | -0.04 | 0.7046 | -0.03 | 0.7669 |  |
|              | 6.7 (4.5,   | 6.9 (4.5,   | 6.3 (4.7,   |       |        |       |        |  |
| PD-1+ CD8+   | 10.6)       | 11.1)       | 10.1)       | -0.42 | 0.5134 | -0.58 | 0.3788 |  |
| PD-1+ TCF-1- | 3.9 (2.1,   | 4.3 (2.3,   | 3.2 (2.1,   |       |        |       |        |  |
| CD8+         | 6.7)        | 6.9)        | 5.9)        | -0.53 | 0.2293 | -0.62 | 0.1744 |  |
| Tbet+ CD8+   | 38 (26, 47) | 38 (25, 47) | 38 (26, 47) | 0.3   | 0.9054 | 1     | 0.7053 |  |
| TCF1+ CD8+   | 55 (42, 69) | 55 (42, 69) | 59 (41, 70) | 1.3   | 0.6532 | 1.2   | 0.6851 |  |



**Table S3.7****Conventional T helper cells distribution for Vag Biopsy FBS/DMSO specimen comparing BV positive vs negative**

| Characteristic         | Expected |         |     | BV Positive | BV Negative |
|------------------------|----------|---------|-----|-------------|-------------|
|                        | Max N    | Missing | N   |             |             |
| CD25- CD127-+          | 174      | 17      | 157 | 42          | 115         |
| CCR5+ Tconv            | 157      | 2       | 155 | 40          | 115         |
| CCR6+ Tconv            | 157      | 2       | 155 | 40          | 115         |
| CCR7+ CD45RA+<br>Tconv | 157      | 2       | 155 | 40          | 115         |
| CCR7+ CD45RA-<br>Tconv | 157      | 2       | 155 | 40          | 115         |
| CCR7- CD45RA+<br>Tconv | 157      | 2       | 155 | 40          | 115         |
| CCR7- CD45RA-<br>Tconv | 157      | 2       | 155 | 40          | 115         |
| CD38+ Tconv            | 157      | 2       | 155 | 40          | 115         |
| CD39+ Tconv            | 157      | 2       | 155 | 40          | 115         |
| CD69+ Tconv            | 157      | 2       | 155 | 40          | 115         |
| CD101+ Tconv           | 157      | 2       | 155 | 40          | 115         |
| CD103+ CD69+<br>Tconv  | 157      | 2       | 155 | 40          | 115         |
| CD103+ CD69-<br>Tconv  | 157      | 2       | 155 | 40          | 115         |
| CD103- CD69+<br>Tconv  | 157      | 2       | 155 | 40          | 115         |

|                        |     |     |     |    |     |
|------------------------|-----|-----|-----|----|-----|
| CD103- CD69-<br>Tconv  | 157 | 2   | 155 | 40 | 115 |
| CTLA-4+ Tconv          | 157 | 2   | 155 | 40 | 115 |
| CXCR3+ Tconv           | 157 | 2   | 155 | 40 | 115 |
| GrzB+ Tconv            | 157 | 2   | 155 | 40 | 115 |
| HLA-DR+ Tconv          | 157 | 2   | 155 | 40 | 115 |
| HLA-DR+ CD38+<br>Tconv | 157 | 2   | 155 | 40 | 115 |
| Ki67+ Tconv            | 157 | 96  | 61  | 13 | 48  |
| PD-1+ Tconv            | 157 | 2   | 155 | 40 | 115 |
| PD-1+TCF-1-<br>Tconv   | 157 | 2   | 155 | 40 | 115 |
| TCF-1+ Tconv           | 157 | 2   | 155 | 40 | 115 |
| Tbet+                  | 157 | 2   | 155 | 40 | 115 |
| CCR5+ Th1              | 155 | 119 | 36  | 11 | 25  |
| CCR7+ CD45RA+<br>Th1   | 155 | 119 | 36  | 11 | 25  |
| CCR7+ CD45RA-<br>Th1   | 155 | 119 | 36  | 11 | 25  |
| CCR7- CD45RA+<br>Th1   | 155 | 119 | 36  | 11 | 25  |
| CCR7- CD45RA-<br>Th1   | 155 | 119 | 36  | 11 | 25  |
| CD38+ Th1              | 155 | 119 | 36  | 11 | 25  |
| CD39+ Th1              | 155 | 119 | 36  | 11 | 25  |
| CD101+ Th1             | 155 | 119 | 36  | 11 | 25  |
| CD103+ CD69+<br>Th1    | 155 | 119 | 36  | 11 | 25  |
| CD103+ CD69-<br>Th1    | 155 | 119 | 36  | 11 | 25  |

|                       |     |     |     |    |     |
|-----------------------|-----|-----|-----|----|-----|
| CD103- CD69+<br>Th1   | 155 | 119 | 36  | 11 | 25  |
| CD103- CD69-<br>Th1   | 155 | 119 | 36  | 11 | 25  |
| CTLA-4+ Th1           | 155 | 119 | 36  | 11 | 25  |
| CXCR3+ Th1            | 155 | 119 | 36  | 11 | 25  |
| GrzB+ Th1             | 155 | 119 | 36  | 11 | 25  |
| HLA-DR+ Th1           | 155 | 119 | 36  | 11 | 25  |
| HLA-DR+ CD38+<br>Th1  | 155 | 119 | 36  | 11 | 25  |
| Ki67+ Th1             | 155 | 144 | 11  | 2  | 9   |
| PD-1+ Th1             | 155 | 119 | 36  | 11 | 25  |
| TCF-1+ Th1            | 155 | 119 | 36  | 11 | 25  |
| CD161+ CCR6+          | 157 | 2   | 155 | 40 | 115 |
| CCR5+ Th17            | 155 | 107 | 48  | 16 | 32  |
| CCR7+ CD45RA+<br>Th17 | 155 | 107 | 48  | 16 | 32  |
| CCR7+ CD45RA-<br>Th17 | 155 | 107 | 48  | 16 | 32  |
| CCR7- CD45RA+<br>Th17 | 155 | 107 | 48  | 16 | 32  |
| CCR7- CD45RA-<br>Th17 | 155 | 107 | 48  | 16 | 32  |
| CD38+ Th17            | 155 | 107 | 48  | 16 | 32  |
| CD39+ Th17            | 155 | 107 | 48  | 16 | 32  |
| CD101+ Th17           | 155 | 107 | 48  | 16 | 32  |
| CD103+ CD69+<br>Th17  | 155 | 107 | 48  | 16 | 32  |
| CD103+ CD69-<br>Th17  | 155 | 107 | 48  | 16 | 32  |

|                       |     |     |    |    |    |
|-----------------------|-----|-----|----|----|----|
| CD103- CD69+<br>Th17  | 155 | 107 | 48 | 16 | 32 |
| CD103- CD69-<br>Th17  | 155 | 107 | 48 | 16 | 32 |
| CTLA-4+ Th17          | 155 | 107 | 48 | 16 | 32 |
| CXCR3+ Th17           | 155 | 107 | 48 | 16 | 32 |
| GrzB+ Th17            | 155 | 107 | 48 | 16 | 32 |
| HLA-DR+ Th17          | 155 | 107 | 48 | 16 | 32 |
| HLA-DR+ CD38+<br>Th17 | 155 | 107 | 48 | 16 | 32 |
| Ki67+ Th17            | 155 | 137 | 18 | 4  | 14 |
| PD-1+ Th17            | 155 | 107 | 48 | 16 | 32 |
| TCF-1+ Th17           | 155 | 107 | 48 | 16 | 32 |

**A regression model estimating the association of BV status (Positive vs Negative) with conventional T helper cells' concentration from Vag Biopsy FBS/DMSO specimen, adjusted for hormonal contraceptive use, semen exposure, HIV exposure, and HSV2 status**

| Tconv cells            | Overall           | BV<br>Negative    | BV Positive       | Unadjusted<br>Beta | Unadjusted p-<br>value | Adjusted<br>Beta | Adjusted<br>p-value |
|------------------------|-------------------|-------------------|-------------------|--------------------|------------------------|------------------|---------------------|
| CD25- CD127-+          | 91.0 (86.7, 94.4) | 91.0 (86.3, 94.8) | 91.1 (88.2, 93.6) | 0                  | 1                      | -0.07            | 0.9469              |
| CCR5+ Tconv            | 81 (40, 93)       | 78 (37, 93)       | 87 (64, 93)       | 4.89               | 0.1859                 | 4.98             | 0.2157              |
| CCR6+ Tconv            | 14 (9, 18)        | 14 (8, 18)        | 15 (11, 18)       | 1.4                | 0.3467                 | 1.44             | 0.2965              |
| CCR7+ CD45RA+<br>Tconv | 4 (1, 20)         | 5 (1, 24)         | 3 (1, 9)          | -1.03              | 0.322                  | -0.98            | 0.3704              |
| CCR7+ CD45RA-<br>Tconv | 15 (9, 21)        | 16 (9, 21)        | 15 (8, 20)        | -0.8               | 0.638                  | -0.71            | 0.6831              |
| CCR7- CD45RA+<br>Tconv | 1.5 (0.5, 4.1)    | 1.5 (0.6, 4.6)    | 1.1 (0.2, 2.7)    | -0.37              | 0.2492                 | -0.49            | 0.1559              |

|                        |                   |                   |                   |       |        |       |        |
|------------------------|-------------------|-------------------|-------------------|-------|--------|-------|--------|
| CCR7- CD45RA-<br>Tconv | 76 (49, 87)       | 74 (49, 87)       | 79 (51, 88)       | 3.5   | 0.3163 | 3.77  | 0.3142 |
| CD38+ Tconv            | 6 (2, 12)         | 7 (2, 13)         | 5 (1, 10)         | -1.42 | 0.2104 | -1.6  | 0.1862 |
| CD39+ Tconv            | 19 (6, 41)        | 15 (5, 40)        | 30 (11, 44)       | 6.78  | 0.0166 | 6.63  | 0.0331 |
| CD69+ Tconv            | 78 (20, 93)       | 72 (18, 91)       | 87 (59, 95)       | 7.4   | 0.063  | 7.5   | 0.0884 |
| CD101+ Tconv           | 28 (12, 48)       | 27 (11, 44)       | 38 (20, 59)       | 9.7   | 0.0147 | 10.88 | 0.0118 |
| CD103+ CD69+<br>Tconv  | 26 (9, 46)        | 24 (7, 43)        | 38 (20, 54)       | 11.98 | 0.0032 | 12.25 | 0.0061 |
| CD103+ CD69-<br>Tconv  | 0.05 (0.00, 0.54) | 0.07 (0.00, 0.63) | 0.00 (0.00, 0.44) | 0     | 1      | 0     | 1      |
| CD103- CD69+<br>Tconv  | 30 (9, 50)        | 28 (7, 51)        | 35 (14, 46)       | 2     | 0.6056 | 2.35  | 0.6066 |
| CD103- CD69-<br>Tconv  | 21 (7, 79)        | 27 (9, 82)        | 13 (5, 41)        | -7.3  | 0.0663 | -7.2  | 0.0899 |
| CTLA-4+ Tconv          | 4 (2, 10)         | 5 (2, 10)         | 3 (2, 8)          | -0.62 | 0.4336 | -0.4  | 0.6383 |
| CXCR3+ Tconv           | 36 (22, 51)       | 36 (22, 53)       | 34 (19, 44)       | -3.4  | 0.3837 | -5.15 | 0.176  |
| GrzB+ Tconv            | 1.8 (0.4, 4.2)    | 1.8 (0.4, 4.6)    | 2.2 (0.7, 3.6)    | 0     | 1      | -0.02 | 0.97   |
| HLA-DR+ Tconv          | 25 (11, 42)       | 21 (10, 43)       | 27 (19, 40)       | 3.48  | 0.3089 | 3.12  | 0.3864 |
| HLA-DR+ CD38+<br>Tconv | 0.80 (0.00, 2.24) | 0.80 (0.00, 2.25) | 0.92 (0.00, 2.02) | 0     | 1      | 0     | 1      |
| Ki67+ Tconv            | 3 (1, 6)          | 3 (1, 5)          | 4 (2, 7)          | 1.16  | 0.2122 | 1.13  | 0.2351 |
| PD-1+ Tconv            | 43 (20, 62)       | 41 (19, 62)       | 51 (27, 64)       | 5.4   | 0.2149 | 5.55  | 0.261  |
| PD-1+TCF-1-<br>Tconv   | 34 (14, 56)       | 34 (13, 57)       | 40 (19, 51)       | 2.1   | 0.6226 | 2.09  | 0.6578 |
| TCF-1+ Tconv           | 27 (14, 52)       | 30 (15, 58)       | 24 (10, 31)       | -8.6  | 0.0435 | -9.2  | 0.0401 |
| Tbet+                  | 2.7 (1.0, 7.0)    | 2.9 (1.0, 7.2)    | 2.1 (0.7, 5.9)    | -0.57 | 0.3284 | -0.6  | 0.3237 |
| CCR5+ Th1              | 93 (78, 100)      | 93 (75, 100)      | 93 (88, 98)       | 0     | 1      | -3.19 | 0.549  |

|                   |                   |                   |                   |       |        |        |        |
|-------------------|-------------------|-------------------|-------------------|-------|--------|--------|--------|
| CCR7+ CD45RA+ Th1 | 0.9 (0.0, 3.2)    | 2.1 (0.0, 3.3)    | 0.4 (0.0, 2.7)    | 0     | 1      | -0.18  | 0.8094 |
| CCR7+ CD45RA- Th1 | 10 (4, 17)        | 11 (4, 17)        | 7 (4, 16)         | -1.34 | 0.7078 | -1.03  | 0.8208 |
| CCR7- CD45RA+ Th1 | 4 (0, 9)          | 4 (0, 8)          | 3 (0, 12)         | 0     | 1      | -0.62  | 0.8211 |
| CCR7- CD45RA- Th1 | 81 (66, 87)       | 82 (69, 87)       | 75 (46, 89)       | -5.4  | 0.4256 | -15.03 | 0.0771 |
| CD38+ Th1         | 6 (1, 16)         | 6 (3, 18)         | 4 (0, 14)         | -2.08 | 0.444  | -2.29  | 0.4961 |
| CD39+ Th1         | 7 (0, 23)         | 15 (1, 39)        | 5 (0, 14)         | -3.3  | 0.5036 | -6.1   | 0.412  |
| CD101+ Th1        | 22 (6, 42)        | 21 (9, 49)        | 23 (1, 40)        | -6.5  | 0.4177 | -8.21  | 0.4102 |
| CD103+ CD69+ Th1  | 4 (0, 21)         | 6 (0, 24)         | 4 (1, 10)         | -0.56 | 0.8891 | -4.87  | 0.349  |
| CD103+ CD69- Th1  | 0.00 (0.00, 0.00) | 0.00 (0.00, 0.00) | 0.00 (0.00, 0.00) | 0     | 1      | 0 NaN  |        |
| CD103- CD69+ Th1  | 32 (4, 51)        | 32 (3, 49)        | 27 (5, 66)        | 2.4   | 0.7888 | 8.08   | 0.5701 |
| CD103- CD69- Th1  | 44 (19, 93)       | 44 (20, 96)       | 44 (14, 64)       | -6.9  | 0.564  | -16.29 | 0.3054 |
| CTLA-4+ Th1       | 4 (0, 14)         | 6 (0, 18)         | 1 (0, 3)          | -5.01 | 0.1142 | -6.44  | 0.0973 |
| CXCR3+ Th1        | 55 (32, 71)       | 54 (33, 62)       | 61 (13, 81)       | 4.4   | 0.6927 | 3.37   | 0.7827 |
| GrzB+ Th1         | 29 (13, 50)       | 33 (13, 55)       | 26 (10, 47)       | -6.4  | 0.54   | -12.82 | 0.3504 |
| HLA-DR+ Th1       | 35 (23, 55)       | 33 (21, 62)       | 39 (24, 47)       | -3.5  | 0.7107 | -5.59  | 0.5347 |
| HLA-DR+ CD38+ Th1 | 4 (1, 11)         | 4 (2, 14)         | 3 (0, 8)          | -1.71 | 0.4123 | -1.76  | 0.4324 |
| Ki67+ Th1         | 3 (0, 9)          | 3 (0, 11)         | 3 (2, 5)          | 0     | 1      | 1.13   | 0.2351 |
| PD-1+ Th1         | 68 (41, 81)       | 67 (42, 81)       | 69 (39, 81)       | -3    | 0.7358 | -11.45 | 0.2561 |
| TCF-1+ Th1        | 18 (8, 31)        | 15 (7, 31)        | 24 (10, 37)       | 3.8   | 0.5835 | 3.48   | 0.6986 |
| CD161+ CCR6+ Th1  | 6 (4, 10)         | 6 (4, 10)         | 6 (4, 12)         | 0.7   | 0.4213 | 0.81   | 0.3618 |
| CCR5+ Th17        | 96 (91, 99)       | 96 (88, 100)      | 97 (93, 99)       | 1.2   | 0.5302 | 2.64   | 0.2767 |

|                    |                   |                   |                   |       |        |       |        |
|--------------------|-------------------|-------------------|-------------------|-------|--------|-------|--------|
| CCR7+ CD45RA+ Th17 | 0.00 (0.00, 2.33) | 0.34 (0.00, 2.87) | 0.00 (0.00, 0.28) | 0     | 1      | 0     | 0.9951 |
| CCR7+ CD45RA- Th17 | 12 (6, 25)        | 12 (4, 26)        | 13 (7, 19)        | 2.06  | 0.5762 | 0.23  | 0.9604 |
| CCR7- CD45RA+ Th17 | 0.00 (0.00, 0.57) | 0.00 (0.00, 2.03) | 0.00 (0.00, 0.00) | 0     | 1      | 0     | 1      |
| CCR7- CD45RA- Th17 | 84 (70, 93)       | 80 (69, 95)       | 88 (74, 93)       | 0.27  | 0.9549 | 3.56  | 0.52   |
| CD38+ Th17         | 5 (1, 13)         | 6 (1, 17)         | 4 (0, 9)          | -1.55 | 0.4666 | -0.75 | 0.7314 |
| CD39+ Th17         | 57 (32, 76)       | 52 (16, 77)       | 59 (47, 71)       | 7.96  | 0.4029 | 6.23  | 0.5373 |
| CD101+ Th17        | 53 (24, 74)       | 47 (17, 65)       | 65 (52, 79)       | 23.03 | 0.0132 | 27.02 | 0.0024 |
| CD103+ CD69+ Th17  | 50 (23, 67)       | 49 (22, 60)       | 59 (43, 78)       | 17.95 | 0.0293 | 21.15 | 0.0059 |
| CD103+ CD69- Th17  | 0.00 (0.00, 0.00) | 0.00 (0.00, 0.00) | 0.00 (0.00, 0.00) | 0     | 1      | 0     | 1      |
| CD103- CD69+ Th17  | 39 (20, 60)       | 39 (22, 64)       | 38 (20, 50)       | -4.27 | 0.6272 | -4.5  | 0.6827 |
| CD103- CD69- Th17  | 3 (0, 6)          | 3 (1, 7)          | 1 (0, 3)          | -1.17 | 0.3898 | -1.35 | 0.423  |
| CTLA-4+ Th17       | 10 (3, 23)        | 13 (6, 27)        | 7 (2, 11)         | -5.9  | 0.1426 | -3.87 | 0.4037 |
| CXCR3+ Th17        | 26 (17, 48)       | 34 (19, 54)       | 18 (15, 41)       | -8.04 | 0.2032 | -12.5 | 0.0613 |
| GrzB+ Th17         | 0.00 (0.00, 0.00) | 0.00 (0.00, 0.00) | 0.00 (0.00, 3.71) | 0     | 1      | 0     | 1      |
| HLA-DR+ Th17       | 45 (31, 60)       | 38 (28, 69)       | 48 (36, 52)       | -1.36 | 0.8604 | 1     | 0.9151 |
| HLA-DR+ CD38+ Th17 | 2 (0, 7)          | 3 (0, 7)          | 2 (0, 4)          | -1.02 | 0.296  | 0     | 1      |
| Ki67+ Th17         | 5 (1, 8)          | 5 (1, 8)          | 5 (2, 9)          | 0     | 1      | 1.13  | 0.2351 |
| PD-1+ Th17         | 68 (47, 84)       | 71 (40, 86)       | 65 (50, 75)       | -7.5  | 0.2902 | -3.27 | 0.6899 |
| TCF-1+ Th17        | 10 (5, 22)        | 13 (6, 28)        | 8 (2, 18)         | -5.36 | 0.1293 | -5.68 | 0.1451 |

**Table S3.8**

**Conventional T helper cells distribution for EctoCx Biopsy FBS/DMSO specimen  
comparing BV positive vs negative**

| Characteristic         | Expected<br>Max N | Missing | N  | BV Positive | BV Negative |     |
|------------------------|-------------------|---------|----|-------------|-------------|-----|
| CD25- CD127-+          | 178               |         | 12 | 166         | 47          | 119 |
| CCR5+ Tconv            | 166               |         | 2  | 164         | 46          | 118 |
| CCR6+ Tconv            | 166               |         | 2  | 164         | 46          | 118 |
| CCR7+                  |                   |         |    |             |             |     |
| CD45RA+ Tconv          | 166               |         | 2  | 164         | 46          | 118 |
| CCR7+ CD45RA-<br>Tconv | 166               |         | 2  | 164         | 46          | 118 |
| CCR7-                  |                   |         |    |             |             |     |
| CD45RA+ Tconv          | 166               |         | 2  | 164         | 46          | 118 |
| CCR7- CD45RA-<br>Tconv | 166               |         | 2  | 164         | 46          | 118 |
| CD38+ Tconv            | 166               |         | 2  | 164         | 46          | 118 |
| CD39+ Tconv            | 166               |         | 2  | 164         | 46          | 118 |
| CD69+ Tconv            | 166               |         | 2  | 164         | 46          | 118 |
| CD101+ Tconv           | 166               |         | 2  | 164         | 46          | 118 |
| CD103+ CD69+<br>Tconv  | 166               |         | 2  | 164         | 46          | 118 |
| CD103+ CD69-<br>Tconv  | 166               |         | 2  | 164         | 46          | 118 |



|                        |     |     |     |    |     |
|------------------------|-----|-----|-----|----|-----|
| CD103- CD69+<br>Tconv  | 166 | 2   | 164 | 46 | 118 |
| CD103- CD69-<br>Tconv  | 166 | 2   | 164 | 46 | 118 |
| CTLA-4+ Tconv          | 166 | 2   | 164 | 46 | 118 |
| CXCR3+ Tconv           | 166 | 2   | 164 | 46 | 118 |
| GrzB+ Tconv            | 166 | 2   | 164 | 46 | 118 |
| HLA-DR+ Tconv          | 166 | 2   | 164 | 46 | 118 |
| HLA-DR+ CD38+<br>Tconv | 166 | 2   | 164 | 46 | 118 |
| Ki67+ Tconv            | 166 | 101 | 65  | 15 | 50  |
| PD-1+ Tconv            | 166 | 2   | 164 | 46 | 118 |
| PD-1+TCF-1-<br>Tconv   | 166 | 2   | 164 | 46 | 118 |
| TCF-1+ Tconv           | 166 | 2   | 164 | 46 | 118 |
| Tbet+                  | 166 | 2   | 164 | 46 | 118 |
| CCR5+ Th1              | 164 | 125 | 39  | 14 | 25  |
| CCR7+<br>CD45RA+ Th1   | 164 | 125 | 39  | 14 | 25  |
| CCR7+ CD45RA-<br>Th1   | 164 | 125 | 39  | 14 | 25  |
| CCR7-<br>CD45RA+ Th1   | 164 | 125 | 39  | 14 | 25  |
| CCR7- CD45RA-<br>Th1   | 164 | 125 | 39  | 14 | 25  |
| CD38+ Th1              | 164 | 125 | 39  | 14 | 25  |
| CD39+ Th1              | 164 | 125 | 39  | 14 | 25  |
| CD101+ Th1             | 164 | 125 | 39  | 14 | 25  |
| CD103+ CD69+<br>Th1    | 164 | 125 | 39  | 14 | 25  |

|                       |     |     |     |    |     |
|-----------------------|-----|-----|-----|----|-----|
| CD103+ CD69-<br>Th1   | 164 | 125 | 39  | 14 | 25  |
| CD103- CD69+<br>Th1   | 164 | 125 | 39  | 14 | 25  |
| CD103- CD69-<br>Th1   | 164 | 125 | 39  | 14 | 25  |
| CTLA-4+ Th1           | 164 | 125 | 39  | 14 | 25  |
| CXCR3+ Th1            | 164 | 125 | 39  | 14 | 25  |
| GrzB+ Th1             | 164 | 125 | 39  | 14 | 25  |
| HLA-DR+ Th1           | 164 | 125 | 39  | 14 | 25  |
| HLA-DR+ CD38+<br>Th1  | 164 | 125 | 39  | 14 | 25  |
| Ki67+ Th1             | 164 | 155 | 9   | 2  | 7   |
| PD-1+ Th1             | 164 | 125 | 39  | 14 | 25  |
| TCF-1+ Th1            | 164 | 125 | 39  | 14 | 25  |
| CD161+ CCR6+          | 166 | 2   | 164 | 46 | 118 |
| CCR5+ Th17            | 164 | 108 | 56  | 20 | 36  |
| CCR7+<br>CD45RA+ Th17 | 164 | 108 | 56  | 20 | 36  |
| CCR7+ CD45RA-<br>Th17 | 164 | 108 | 56  | 20 | 36  |
| CCR7-<br>CD45RA+ Th17 | 164 | 108 | 56  | 20 | 36  |
| CCR7- CD45RA-<br>Th17 | 164 | 108 | 56  | 20 | 36  |
| CD38+ Th17            | 164 | 108 | 56  | 20 | 36  |
| CD39+ Th17            | 164 | 108 | 56  | 20 | 36  |
| CD101+ Th17           | 164 | 108 | 56  | 20 | 36  |
| CD103+ CD69+<br>Th17  | 164 | 108 | 56  | 20 | 36  |

|                       |     |     |    |    |    |
|-----------------------|-----|-----|----|----|----|
| CD103+ CD69-<br>Th17  | 164 | 108 | 56 | 20 | 36 |
| CD103- CD69+<br>Th17  | 164 | 108 | 56 | 20 | 36 |
| CD103- CD69-<br>Th17  | 164 | 108 | 56 | 20 | 36 |
| CTLA-4+ Th17          | 164 | 108 | 56 | 20 | 36 |
| CXCR3+ Th17           | 164 | 108 | 56 | 20 | 36 |
| GrzB+ Th17            | 164 | 108 | 56 | 20 | 36 |
| HLA-DR+ Th17          | 164 | 108 | 56 | 20 | 36 |
| HLA-DR+ CD38+<br>Th17 | 164 | 108 | 56 | 20 | 36 |
| Ki67+ Th17            | 164 | 148 | 16 | 5  | 11 |
| PD-1+ Th17            | 164 | 108 | 56 | 20 | 36 |
| TCF-1+ Th17           | 164 | 108 | 56 | 20 | 36 |

**A regression model estimating the association of BV status (Positive vs Negative) with conventional T helper cells' concentration from EctoCx Biopsy FBS/DMSO specimen, adjusted for hormonal contraceptive use, semen exposure, HIV exposure, and HSV2 status**

| Tconv cells            | Overall           | BV<br>Negative    | BV Positive       | Unadjusted<br>Beta | Unadjusted<br>p-value | Adjusted<br>Beta | Adjusted p-<br>value |
|------------------------|-------------------|-------------------|-------------------|--------------------|-----------------------|------------------|----------------------|
| CD25- CD127-+          | 91.4 (86.7, 94.4) | 91.4 (87.4, 94.0) | 90.5 (85.8, 94.9) | -0.5               | 0.5719                | -0.55            | 0.5907               |
| CCR5+ Tconv            | 62 (29, 86)       | 61 (30, 85)       | 70 (24, 87)       | 2.4                | 0.6179                | 1.53             | 0.7716               |
| CCR6+ Tconv            | 15 (9, 22)        | 15 (9, 22)        | 15 (10, 22)       | 0.9                | 0.5368                | 0.44             | 0.788                |
| CCR7+<br>CD45RA+ Tconv | 11 (2, 28)        | 13 (4, 27)        | 10 (1, 28)        | -1.37              | 0.4519                | -1.38            | 0.5254               |

|                        |                   |                   |                   |       |        |       |        |
|------------------------|-------------------|-------------------|-------------------|-------|--------|-------|--------|
| CCR7+ CD45RA-<br>Tconv | 16 (10, 22)       | 16 (11, 22)       | 13 (9, 23)        | -1.3  | 0.3586 | -1.27 | 0.4248 |
| CCR7-<br>CD45RA+ Tconv | 2.8 (0.9, 5.5)    | 2.9 (0.9, 6.0)    | 2.4 (1.0, 5.0)    | -0.35 | 0.4445 | -0.34 | 0.5244 |
| CCR7- CD45RA-<br>Tconv | 65 (44, 82)       | 64 (45, 80)       | 70 (44, 87)       | 3     | 0.4348 | 2.67  | 0.5188 |
| CD38+ Tconv            | 12 (5, 21)        | 11 (5, 19)        | 18 (7, 22)        | 3.23  | 0.066  | 3.01  | 0.1091 |
| CD39+ Tconv            | 13 (4, 37)        | 12 (5, 34)        | 15 (4, 39)        | 0.53  | 0.8157 | 0.5   | 0.8667 |
| CD69+ Tconv            | 56 (12, 85)       | 54 (13, 83)       | 59 (8, 86)        | 0.4   | 0.9268 | 1.46  | 0.7789 |
| CD101+ Tconv           | 22 (8, 47)        | 22 (8, 41)        | 22 (11, 57)       | 3.1   | 0.361  | 4.47  | 0.2583 |
| CD103+ CD69+<br>Tconv  | 17 (4, 42)        | 16 (4, 42)        | 19 (2, 42)        | 0     | 1      | 0.53  | 0.8926 |
| CD103+ CD69-<br>Tconv  | 0.13 (0.00, 0.50) | 0.00 (0.00, 0.47) | 0.27 (0.00, 0.66) | 0     | 1      | 0     | 1      |
| CD103- CD69+<br>Tconv  | 20 (5, 41)        | 19 (5, 41)        | 22 (4, 40)        | 0.4   | 0.8919 | 1.92  | 0.6056 |
| CD103- CD69-<br>Tconv  | 44 (15, 87)       | 46 (17, 86)       | 44 (13, 90)       | -0.48 | 0.9147 | -1.44 | 0.7828 |
| CTLA-4+ Tconv          | 4 (2, 10)         | 4 (2, 9)          | 4 (1, 12)         | 0.14  | 0.8595 | 0.05  | 0.9536 |
| CXCR3+ Tconv           | 31 (21, 43)       | 31 (21, 45)       | 32 (21, 39)       | -1.7  | 0.575  | -2.29 | 0.4947 |
| GrzB+ Tconv            | 1.9 (0.4, 4.8)    | 1.9 (0.4, 4.4)    | 2.1 (0.4, 5.6)    | 0.24  | 0.4799 | 0.4   | 0.3374 |
| HLA-DR+ Tconv          | 25 (9, 40)        | 24 (9, 40)        | 28 (13, 39)       | 1.7   | 0.5581 | 1.55  | 0.6607 |
| HLA-DR+ CD38+<br>Tconv | 1.5 (0.5, 3.6)    | 1.4 (0.5, 3.1)    | 1.6 (0.9, 5.9)    | 0.27  | 0.4246 | 0.35  | 0.3406 |
| Ki67+ Tconv            | 2.3 (0.9, 5.1)    | 2.0 (0.7, 5.0)    | 2.7 (1.5, 5.6)    | 0.53  | 0.4947 | 0.52  | 0.5148 |
| PD-1+ Tconv            | 35 (16, 57)       | 33 (15, 57)       | 39 (18, 63)       | 3.9   | 0.2971 | 3.83  | 0.3309 |
| PD-1+TCF-1-<br>Tconv   | 27 (10, 45)       | 27 (10, 44)       | 28 (10, 46)       | 1.47  | 0.6669 | 0.8   | 0.8223 |

|                   |                   |                   |                   |       |        |        |        |
|-------------------|-------------------|-------------------|-------------------|-------|--------|--------|--------|
| TCF-1+ Tconv      | 43 (19, 60)       | 42 (20, 57)       | 43 (19, 65)       | 0.61  | 0.8991 | 0.64   | 0.8956 |
| Tbet+             | 3.0 (1.4, 6.1)    | 2.9 (1.1, 5.7)    | 3.5 (1.9, 6.6)    | 0.57  | 0.2871 | 0.59   | 0.2949 |
| CCR5+ Th1         | 84 (70, 98)       | 85 (70, 98)       | 81 (70, 96)       | 0     | 1      | -1.79  | 0.8019 |
| CCR7+ CD45RA+ Th1 | 1.6 (0.0, 2.9)    | 1.6 (0.0, 2.9)    | 1.9 (0.0, 2.9)    | 0     | 1      | 0.04   | 0.9764 |
| CCR7+ CD45RA- Th1 | 11 (3, 15)        | 10 (3, 14)        | 11 (3, 21)        | 1.1   | 0.7198 | 1.96   | 0.5246 |
| CCR7- CD45RA+ Th1 | 4 (0, 10)         | 3 (0, 10)         | 6 (2, 9)          | 1.45  | 0.497  | 1.61   | 0.5283 |
| CCR7- CD45RA- Th1 | 78 (68, 92)       | 81 (68, 91)       | 77 (64, 90)       | -2.03 | 0.7621 | -2.47  | 0.7479 |
| CD38+ Th1         | 13 (7, 25)        | 13 (9, 19)        | 8 (5, 38)         | -2.52 | 0.5028 | -5.34  | 0.2254 |
| CD39+ Th1         | 13 (4, 28)        | 15 (7, 30)        | 4 (2, 22)         | -4.02 | 0.4303 | -10.95 | 0.2051 |
| CD101+ Th1        | 35 (12, 55)       | 26 (10, 56)       | 42 (23, 54)       | 7.32  | 0.4167 | 13.75  | 0.2556 |
| CD103+ CD69+ Th1  | 6 (0, 19)         | 6 (0, 17)         | 3 (0, 22)         | 0     | 1      | -4.76  | 0.4194 |
| CD103+ CD69- Th1  | 0.00 (0.00, 0.05) | 0.00 (0.00, 0.00) | 0.00 (0.00, 0.17) | 0     | 1      | 0      | 1      |
| CD103- CD69+ Th1  | 22 (11, 52)       | 22 (13, 55)       | 16 (4, 46)        | -8.9  | 0.2788 | -11.16 | 0.3275 |
| CD103- CD69- Th1  | 50 (9, 88)        | 44 (8, 79)        | 82 (13, 95)       | 10.56 | 0.293  | 12.89  | 0.3617 |
| CTLA-4+ Th1       | 9 (1, 18)         | 10 (5, 17)        | 2 (0, 22)         | -3.12 | 0.3442 | -4.42  | 0.2962 |
| CXCR3+ Th1        | 57 (38, 71)       | 57 (39, 72)       | 59 (39, 67)       | -3.76 | 0.6623 | -5.8   | 0.5873 |
| GrzB+ Th1         | 26 (2, 72)        | 14 (1, 59)        | 41 (12, 84)       | 16.1  | 0.1546 | 21.34  | 0.1259 |
| HLA-DR+ Th1       | 36 (24, 67)       | 36 (27, 55)       | 37 (21, 70)       | 0.79  | 0.9328 | -6.84  | 0.4929 |
| HLA-DR+ CD38+ Th1 | 10 (3, 19)        | 10 (4, 19)        | 8 (3, 21)         | 0.4   | 0.9034 | -3.66  | 0.4093 |
| Ki67+ Th1         | 6 (6, 16)         | 6 (5, 11)         | 25 (18, 32)       | 17.19 | 0.161  | 25.64  | 0.0984 |
| PD-1+ Th1         | 64 (40, 82)       | 64 (40, 75)       | 64 (37, 84)       | 3.94  | 0.6746 | 5.38   | 0.6746 |

|                    |                   |                   |                   |       |        |        |        |
|--------------------|-------------------|-------------------|-------------------|-------|--------|--------|--------|
| TCF-1+ Th1         | 21 (14, 39)       | 23 (16, 40)       | 19 (14, 30)       | -6.2  | 0.3501 | -10.58 | 0.1458 |
| CD161+ CCR6+       | 6.3 (3.9, 10.1)   | 6.1 (4.0, 9.8)    | 7.1 (3.8, 12.2)   | 0.58  | 0.4554 | 0.33   | 0.7036 |
| CCR5+ Th17         | 89 (71, 95)       | 89 (71, 93)       | 88 (70, 97)       | 0.7   | 0.8465 | 5.23   | 0.1931 |
| CCR7+ CD45RA+ Th17 | 0.38 (0.00, 2.01) | 0.33 (0.00, 2.01) | 0.91 (0.00, 1.73) | 0     | 1      | -0.07  | 0.8357 |
| CCR7+ CD45RA- Th17 | 16 (10, 28)       | 16 (10, 28)       | 16 (10, 35)       | 0.97  | 0.7939 | 0.98   | 0.8228 |
| CCR7- CD45RA+ Th17 | 0.00 (0.00, 0.79) | 0.00 (0.00, 0.53) | 0.00 (0.00, 0.85) | 0     | 1      | 0      | 1      |
| CCR7- CD45RA- Th17 | 81 (69, 88)       | 82 (71, 88)       | 80 (63, 88)       | -1.4  | 0.72   | 0.41   | 0.9326 |
| CD38+ Th17         | 11 (4, 22)        | 10 (4, 18)        | 11 (5, 39)        | 4.66  | 0.2257 | 6.18   | 0.1406 |
| CD39+ Th17         | 45 (14, 63)       | 44 (13, 63)       | 53 (20, 71)       | 3.9   | 0.6266 | 2.66   | 0.7689 |
| CD101+ Th17        | 39 (16, 76)       | 36 (16, 71)       | 52 (16, 80)       | 4.85  | 0.5073 | 11.9   | 0.1884 |
| CD103+ CD69+ Th17  | 33 (15, 62)       | 31 (12, 61)       | 39 (17, 70)       | 3.5   | 0.6841 | 8.02   | 0.3772 |
| CD103+ CD69- Th17  | 0.00 (0.00, 0.46) | 0.00 (0.00, 0.26) | 0.00 (0.00, 0.90) | 0     | 1      | 0      | 1      |
| CD103- CD69+ Th17  | 31 (9, 52)        | 32 (15, 54)       | 24 (8, 47)        | -5.43 | 0.473  | -3.23  | 0.7132 |
| CD103- CD69- Th17  | 10 (2, 34)        | 10 (3, 32)        | 10 (2, 41)        | -0.35 | 0.9372 | -5.85  | 0.3004 |
| CTLA-4+ Th17       | 13 (4, 26)        | 13 (7, 19)        | 13 (2, 28)        | -0.34 | 0.9208 | 1.24   | 0.7772 |
| CXCR3+ Th17        | 38 (21, 48)       | 38 (25, 49)       | 36 (20, 44)       | -3.7  | 0.4894 | -3.09  | 0.5853 |
| GrzB+ Th17         | 0.00 (0.00, 0.14) | 0.00 (0.00, 0.72) | 0.00 (0.00, 0.00) | 0     | 1      | 0      | 1      |
| HLA-DR+ Th17       | 45 (23, 65)       | 45 (23, 61)       | 46 (29, 70)       | 3.05  | 0.7202 | 7.2    | 0.3991 |
| HLA-DR+ CD38+ Th17 | 5 (2, 13)         | 6 (1, 11)         | 5 (2, 21)         | 2.63  | 0.2297 | 4.63   | 0.0514 |

|             |                 |                 |                 |      |        |       |        |
|-------------|-----------------|-----------------|-----------------|------|--------|-------|--------|
| Ki67+ Th17  | 7.3 (3.1, 13.0) | 5.3 (2.8, 10.5) | 8.1 (7.3, 13.7) | 3.87 | 0.3186 | 4.31  | 0.2214 |
| PD-1+ Th17  | 68 (38, 77)     | 68 (40, 76)     | 69 (34, 81)     | 1.59 | 0.8027 | 4.8   | 0.5425 |
| TCF-1+ Th17 | 25 (11, 36)     | 22 (11, 35)     | 26 (10, 51)     | 2.02 | 0.7254 | -1.75 | 0.7722 |

**Table S3.9****Conventional T helper cells distribution for PBMC ACD specimen comparing BV positive vs negative**

| Characteristic         | Expected |         | N   | BV Positive | BV Negative |
|------------------------|----------|---------|-----|-------------|-------------|
|                        | Max N    | Missing |     |             |             |
| CD25- CD127-+          | 200      | 0       | 200 | 60          | 140         |
| CCR5+ Tconv            | 200      | 0       | 200 | 60          | 140         |
| CCR6+ Tconv            | 200      | 0       | 200 | 60          | 140         |
| CCR7+                  |          |         |     |             |             |
| CD45RA+ Tconv          | 200      | 0       | 200 | 60          | 140         |
| CCR7+ CD45RA-<br>Tconv | 200      | 0       | 200 | 60          | 140         |
| CCR7-                  |          |         |     |             |             |
| CD45RA+ Tconv          | 200      | 0       | 200 | 60          | 140         |
| CCR7- CD45RA-<br>Tconv | 200      | 0       | 200 | 60          | 140         |
| CD38+ Tconv            | 200      | 0       | 200 | 60          | 140         |
| CD39+ Tconv            | 200      | 0       | 200 | 60          | 140         |
| CD69+ Tconv            | 200      | 0       | 200 | 60          | 140         |
| CD101+ Tconv           | 200      | 0       | 200 | 60          | 140         |
| CD103+ CD69+<br>Tconv  | 200      | 0       | 200 | 60          | 140         |
| CD103+ CD69-<br>Tconv  | 200      | 0       | 200 | 60          | 140         |



|                        |     |     |     |    |     |
|------------------------|-----|-----|-----|----|-----|
| CD103- CD69+<br>Tconv  | 200 | 0   | 200 | 60 | 140 |
| CD103- CD69-<br>Tconv  | 200 | 0   | 200 | 60 | 140 |
| CTLA-4+ Tconv          | 200 | 0   | 200 | 60 | 140 |
| CXCR3+ Tconv           | 200 | 0   | 200 | 60 | 140 |
| GrzB+ Tconv            | 200 | 0   | 200 | 60 | 140 |
| HLA-DR+ Tconv          | 200 | 0   | 200 | 60 | 140 |
| HLA-DR+ CD38+<br>Tconv | 200 | 0   | 200 | 60 | 140 |
| Ki67+ Tconv            | 200 | 120 | 80  | 22 | 58  |
| PD-1+ Tconv            | 200 | 0   | 200 | 60 | 140 |
| PD-1+TCF-1-<br>Tconv   | 200 | 0   | 200 | 60 | 140 |
| TCF-1+ Tconv           | 200 | 0   | 200 | 60 | 140 |
| Tbet+                  | 200 | 0   | 200 | 60 | 140 |
| CCR5+ Th1              | 200 | 0   | 200 | 60 | 140 |
| CCR7+<br>CD45RA+ Th1   | 200 | 0   | 200 | 60 | 140 |
| CCR7+ CD45RA-<br>Th1   | 200 | 0   | 200 | 60 | 140 |
| CCR7-<br>CD45RA+ Th1   | 200 | 0   | 200 | 60 | 140 |
| CCR7- CD45RA-<br>Th1   | 200 | 0   | 200 | 60 | 140 |
| CD38+ Th1              | 200 | 0   | 200 | 60 | 140 |
| CD39+ Th1              | 200 | 0   | 200 | 60 | 140 |
| CD101+ Th1             | 200 | 0   | 200 | 60 | 140 |
| CD103+ CD69+<br>Th1    | 200 | 0   | 200 | 60 | 140 |

|                       |     |     |     |    |     |
|-----------------------|-----|-----|-----|----|-----|
| CD103+ CD69-<br>Th1   | 200 | 0   | 200 | 60 | 140 |
| CD103- CD69+<br>Th1   | 200 | 0   | 200 | 60 | 140 |
| CD103- CD69-<br>Th1   | 200 | 0   | 200 | 60 | 140 |
| CTLA-4+ Th1           | 200 | 0   | 200 | 60 | 140 |
| CXCR3+ Th1            | 200 | 0   | 200 | 60 | 140 |
| GrzB+ Th1             | 200 | 0   | 200 | 60 | 140 |
| HLA-DR+ Th1           | 200 | 0   | 200 | 60 | 140 |
| HLA-DR+ CD38+<br>Th1  | 200 | 0   | 200 | 60 | 140 |
| Ki67+ Th1             | 200 | 120 | 80  | 22 | 58  |
| PD-1+ Th1             | 200 | 0   | 200 | 60 | 140 |
| TCF-1+ Th1            | 200 | 0   | 200 | 60 | 140 |
| CD161+ CCR6+          | 200 | 0   | 200 | 60 | 140 |
| CCR5+ Th17            | 200 | 0   | 200 | 60 | 140 |
| CCR7+<br>CD45RA+ Th17 | 200 | 0   | 200 | 60 | 140 |
| CCR7+ CD45RA-<br>Th17 | 200 | 0   | 200 | 60 | 140 |
| CCR7-<br>CD45RA+ Th17 | 200 | 0   | 200 | 60 | 140 |
| CCR7- CD45RA-<br>Th17 | 200 | 0   | 200 | 60 | 140 |
| CD38+ Th17            | 200 | 0   | 200 | 60 | 140 |
| CD39+ Th17            | 200 | 0   | 200 | 60 | 140 |
| CD101+ Th17           | 200 | 0   | 200 | 60 | 140 |
| CD103+ CD69+<br>Th17  | 200 | 0   | 200 | 60 | 140 |

|                       |     |     |     |    |     |
|-----------------------|-----|-----|-----|----|-----|
| CD103+ CD69-<br>Th17  | 200 | 0   | 200 | 60 | 140 |
| CD103- CD69+<br>Th17  | 200 | 0   | 200 | 60 | 140 |
| CD103- CD69-<br>Th17  | 200 | 0   | 200 | 60 | 140 |
| CTLA-4+ Th17          | 200 | 0   | 200 | 60 | 140 |
| CXCR3+ Th17           | 200 | 0   | 200 | 60 | 140 |
| GrzB+ Th17            | 200 | 0   | 200 | 60 | 140 |
| HLA-DR+ Th17          | 200 | 0   | 200 | 60 | 140 |
| HLA-DR+ CD38+<br>Th17 | 200 | 0   | 200 | 60 | 140 |
| Ki67+ Th17            | 200 | 120 | 80  | 22 | 58  |
| PD-1+ Th17            | 200 | 0   | 200 | 60 | 140 |
| TCF-1+ Th17           | 200 | 0   | 200 | 60 | 140 |

**A regression model estimating the association of BV status (Positive vs Negative) with conventional T helper cells' concentration from PBMC ACD specimen, adjusted for hormonal contraceptive use**

| Tconv cells   | Overall          | BV<br>Negative   | BV Positive      | Unadjusted<br>Beta | Unadjusted p-<br>value | Adjusted<br>Beta | Adjusted p-<br>value |
|---------------|------------------|------------------|------------------|--------------------|------------------------|------------------|----------------------|
|               | 95.20<br>(94.18, | 95.20<br>(94.10, | 95.35<br>(94.20, |                    |                        |                  |                      |
| CD25- CD127-+ | 96.40)           | 96.40)           | 96.18)           | 0                  | 1                      | 0                | 1                    |
| CCR5+ Tconv   | 13 (9, 17)       | 13 (9, 17)       | 12 (9, 17)       | -0.3               | 0.7375                 | -0.73            | 0.4413               |
| CCR6+ Tconv   | 14 (11, 19)      | 14 (11, 19)      | 14 (11, 18)      | 0.2                | 0.8348                 | -0.2             | 0.8521               |
| CCR7+         |                  |                  |                  |                    |                        |                  |                      |
| CD45RA+ Tconv | 37 (28, 45)      | 36 (28, 46)      | 38 (29, 45)      | 1                  | 0.6205                 | 1.5              | 0.4824               |

|                        |                            |                            |                            |       |        |       |        |
|------------------------|----------------------------|----------------------------|----------------------------|-------|--------|-------|--------|
| CCR7+ CD45RA-<br>Tconv | 20 (15, 25)                | 20 (15, 25)                | 19 (15, 25)                | -0.3  | 0.7702 | -0.4  | 0.7165 |
| CCR7-<br>CD45RA+ Tconv | 7.0 (4.3,<br>10.8)         | 7.0 (4.4,<br>10.8)         | 6.8 (4.2,<br>10.6)         | -0.21 | 0.7502 | -0.09 | 0.8942 |
| CCR7- CD45RA-<br>Tconv | 34 (26, 43)                | 35 (26, 43)                | 32 (24, 42)                | -1.9  | 0.3091 | -2.6  | 0.195  |
| CD38+ Tconv            | 21 (13, 32)                | 21 (14, 32)                | 20 (12, 33)                | -0.2  | 0.9097 | 0.6   | 0.7558 |
| CD39+ Tconv            | 3.45 (2.07,<br>4.67)       | 3.45 (1.87,<br>4.64)       | 3.45 (2.28,<br>4.68)       | 0.14  | 0.6364 | 0.11  | 0.73   |
| CD69+ Tconv            | 0.86 (0.59,<br>1.30)       | 0.88 (0.60,<br>1.28)       | 0.81 (0.59,<br>1.32)       | -0.02 | 0.7785 | -0.06 | 0.3942 |
| CD101+ Tconv           | 4.7 (2.8,<br>7.7)          | 4.3 (2.8,<br>7.6)          | 5.2 (2.9,<br>8.1)          | 0.22  | 0.6846 | 0.39  | 0.4913 |
| CD103+ CD69+<br>Tconv  | 0.009<br>(0.005,<br>0.019) | 0.009<br>(0.005,<br>0.017) | 0.009<br>(0.004,<br>0.023) | 0     | 0.8643 | 0     | 0.6694 |
| CD103+ CD69-<br>Tconv  | 0.46 (0.33,<br>0.62)       | 0.49 (0.35,<br>0.62)       | 0.40 (0.33,<br>0.64)       | -0.05 | 0.128  | -0.05 | 0.153  |
| CD103- CD69+<br>Tconv  | 0.81 (0.57,<br>1.18)       | 0.86 (0.59,<br>1.18)       | 0.76 (0.52,<br>1.17)       | -0.07 | 0.2722 | -0.09 | 0.2227 |
| CD103- CD69-<br>Tconv  | 98.70<br>(98.20,<br>99.00) | 98.70<br>(98.30,<br>99.00) | 98.80<br>(98.20,<br>99.10) | 0.1   | 0.4936 | 0.1   | 0.5059 |
| CTLA-4+ Tconv          | 1.33 (0.83,<br>1.92)       | 1.34 (0.83,<br>1.96)       | 1.24 (0.85,<br>1.76)       | -0.09 | 0.4868 | -0.1  | 0.431  |
| CXCR3+ Tconv           | 22 (16, 30)                | 23 (17, 30)                | 20 (9, 31)                 | -2.3  | 0.2112 | -3.4  | 0.0797 |
| GrzB+ Tconv            | 2.6 (1.2,<br>5.4)          | 3.0 (1.4,<br>5.5)          | 1.8 (0.9,<br>4.0)          | -0.68 | 0.0573 | -0.8  | 0.0393 |
| HLA-DR+ Tconv          | 4.80 (3.64,<br>6.21)       | 4.83 (3.60,<br>6.15)       | 4.66 (3.69,<br>7.10)       | 0.13  | 0.685  | 0.01  | 0.9755 |

|                     |                   |                   |                   |       |        |       |        |
|---------------------|-------------------|-------------------|-------------------|-------|--------|-------|--------|
| HLA-DR+ CD38+ Tconv | 1.38 (1.03, 1.85) | 1.33 (1.04, 1.76) | 1.54 (0.98, 2.29) | 0.13  | 0.1834 | 0.12  | 0.2266 |
| Ki67+ Tconv         | 0.90 (0.65, 1.19) | 0.91 (0.65, 1.25) | 0.86 (0.62, 1.14) | -0.03 | 0.7871 | -0.01 | 0.9297 |
| PD-1+ Tconv         | 8.9 (6.7, 12.8)   | 8.8 (6.8, 13.1)   | 9.2 (6.6, 12.0)   | 0     | 1      | -0.17 | 0.8046 |
| PD-1+TCF-1- Tconv   | 4.2 (2.3, 6.6)    | 4.2 (2.3, 6.7)    | 3.9 (2.2, 6.3)    | -0.25 | 0.5873 | -0.3  | 0.5131 |
| TCF-1+ Tconv        | 79 (64, 85)       | 79 (63, 85)       | 75 (65, 86)       | 0.2   | 0.9227 | 0.6   | 0.7848 |
| Tbet+ CCR5+ Th1     | 4.8 (2.6, 8.0)    | 5.0 (2.9, 7.9)    | 4.2 (2.2, 8.2)    | -0.41 | 0.4555 | -0.53 | 0.3713 |
| CCR7+ CD45RA+ Th1   | 68 (51, 80)       | 67 (49, 79)       | 73 (58, 83)       | 5.3   | 0.0773 | 3.6   | 0.2653 |
| CCR7+ CD45RA- Th1   | 6 (3, 12)         | 6 (3, 11)         | 6 (3, 15)         | 0.75  | 0.3133 | 0.66  | 0.4006 |
| CCR7- CD45RA+ Th1   | 7 (4, 14)         | 7 (4, 14)         | 7 (4, 14)         | -0.9  | 0.3326 | -0.73 | 0.4588 |
| CCR7- CD45RA- Th1   | 8 (4, 14)         | 8 (4, 14)         | 9 (5, 16)         | 0.64  | 0.5204 | 0.9   | 0.3712 |
| CD38+ Th1           | 73 (61, 82)       | 73 (61, 80)       | 72 (61, 82)       | -0.9  | 0.698  | -1.1  | 0.6495 |
| CD39+ Th1           | 13 (8, 19)        | 13 (8, 18)        | 16 (9, 28)        | 3.4   | 0.0095 | 3.1   | 0.0239 |
| CD101+ Th1          | 3.8 (1.7, 6.5)    | 3.7 (1.7, 5.5)    | 3.9 (1.9, 8.6)    | 0.67  | 0.1202 | 0.44  | 0.3153 |
| CD103+ CD69+ Th1    | 14 (8, 30)        | 13 (8, 25)        | 18 (8, 39)        | 2.8   | 0.1589 | 3.38  | 0.1123 |
| CD103+ CD69- Th1    | 0.00 (0.00, 0.05) | 0.00 (0.00, 0.04) | 0.00 (0.00, 0.10) | 0     | 1      | 0     | 1      |
| CD103- CD69+ Th1    | 0.19 (0.10, 0.37) | 0.19 (0.11, 0.36) | 0.17 (0.06, 0.52) | 0     | 1      | 0     | 0.9998 |
| CD103- CD69- Th1    | 2.69 (1.62, 4.31) | 2.69 (1.59, 4.20) | 2.69 (1.68, 4.67) | 0.09  | 0.7612 | 0     | 1      |

|                            |                            |                            |                            |       |        |       |        |
|----------------------------|----------------------------|----------------------------|----------------------------|-------|--------|-------|--------|
| CD103- CD69-<br>Th1        | 96.95<br>(95.38,<br>98.20) | 97.00<br>(95.48,<br>98.20) | 96.90<br>(94.95,<br>98.05) | -0.2  | 0.4827 | -0.05 | 0.8796 |
| CTLA-4+ Th1                | 2.32 (1.16,<br>4.34)       | 2.31 (1.13,<br>4.12)       | 2.43 (1.19,<br>5.32)       | 0.18  | 0.5726 | 0.17  | 0.6047 |
| CXCR3+ Th1                 | 31 (16, 57)                | 30 (20, 55)                | 31 (9, 60)                 | -2.3  | 0.5354 | -4    | 0.3115 |
| GrzB+ Th1                  | 57 (34, 72)                | 60 (39, 72)                | 44 (28, 62)                | -10.1 | 0.0076 | -9.77 | 0.0104 |
| HLA-DR+ Th1                | 25 (18, 33)                | 24 (17, 31)                | 27 (19, 37)                | 3.4   | 0.0544 | 3.33  | 0.0824 |
| HLA-DR+ CD38+<br>Th1       | 6.6 (4.1,<br>11.5)         | 6.3 (4.0,<br>10.4)         | 8.8 (4.2,<br>16.0)         | 2     | 0.0069 | 1.57  | 0.032  |
| Ki67+ Th1                  | 4.7 (2.3,<br>7.2)          | 4.4 (2.3,<br>6.8)          | 5.3 (3.1,<br>10.9)         | 1.04  | 0.2503 | 1.08  | 0.2239 |
| PD-1+ Th1                  | 39 (25, 51)                | 38 (25, 50)                | 40 (24, 51)                | 0.83  | 0.7729 | 0.27  | 0.9242 |
| TCF-1+ Th1                 | 33 (19, 49)                | 31 (19, 47)                | 36 (21, 50)                | 4.1   | 0.1961 | 4.16  | 0.2082 |
| CD161+ CCR6+<br>CCR5+ Th17 | 4.78 (3.35,<br>6.06)       | 4.81 (3.25,<br>6.06)       | 4.76 (3.42,<br>5.98)       | 0.03  | 0.9311 | -0.12 | 0.7336 |
| CCR7+<br>CD45RA+ Th17      | 29 (23, 37)                | 29 (23, 36)                | 30 (24, 37)                | 0.6   | 0.7062 | 0.1   | 0.9503 |
| CCR7+<br>CD45RA-<br>Th17   | 2.8 (1.8,<br>4.7)          | 2.9 (1.9,<br>4.7)          | 2.8 (1.6,<br>5.9)          | 0.07  | 0.8264 | 0.01  | 0.9752 |
| CCR7-<br>CD45RA+ Th17      | 33 (25, 42)                | 33 (25, 42)                | 33 (23, 43)                | 0.9   | 0.6297 | 1.6   | 0.4102 |
| CCR7-<br>CD45RA-<br>Th17   | 0.99 (0.58,<br>1.51)       | 0.99 (0.60,<br>1.48)       | 0.98 (0.53,<br>1.61)       | 0     | 1      | -0.03 | 0.7635 |
| CD38+ Th17                 | 61 (53, 71)                | 62 (54, 71)                | 60 (48, 71)                | -1.9  | 0.361  | -2.7  | 0.2383 |
| CD39+ Th17                 | 12 (8, 16)                 | 12 (8, 15)                 | 13 (7, 17)                 | 0.38  | 0.6873 | 0.71  | 0.4789 |
| CD101+ Th17                | 7.1 (4.0,<br>11.4)         | 7.2 (3.8,<br>11.3)         | 6.5 (4.3,<br>11.6)         | -0.02 | 0.9782 | -0.03 | 0.9691 |
|                            | 5.7 (3.2,<br>10.2)         | 5.8 (3.2,<br>10.2)         | 5.5 (3.3,<br>9.4)          | 0.06  | 0.923  | 0.08  | 0.9047 |

|                    |                      |                      |                      |       |        |       |        |
|--------------------|----------------------|----------------------|----------------------|-------|--------|-------|--------|
| CD103+ CD69+ Th17  | 0.06 (0.00, 0.12)    | 0.06 (0.01, 0.11)    | 0.05 (0.00, 0.14)    | 0     | 1      | 0     | 0.7556 |
| CD103+ CD69- Th17  | 1.82 (1.14, 2.59)    | 1.95 (1.27, 2.80)    | 1.63 (1.05, 2.21)    | -0.31 | 0.0547 | -0.23 | 0.1686 |
| CD103- CD69+ Th17  | 1.38 (0.95, 2.42)    | 1.46 (0.96, 2.44)    | 1.24 (0.89, 2.16)    | -0.11 | 0.4191 | -0.16 | 0.2544 |
| CD103- CD69- Th17  | 96.50 (95.00, 97.50) | 96.40 (94.80, 97.33) | 97.20 (95.58, 97.90) | 0.5   | 0.0838 | 0.55  | 0.047  |
| CTLA-4+ Th17       | 4.2 (2.4, 6.9)       | 4.2 (2.6, 6.9)       | 4.1 (2.3, 6.4)       | -0.33 | 0.4823 | -0.4  | 0.3961 |
| CXCR3+ Th17        | 35 (23, 41)          | 35 (25, 41)          | 34 (15, 42)          | -2.3  | 0.2922 | -3.44 | 0.1258 |
| GrzB+ Th17         | 0.39 (0.17, 1.14)    | 0.44 (0.19, 1.28)    | 0.33 (0.11, 0.81)    | -0.11 | 0.0989 | -0.12 | 0.0912 |
| HLA-DR+ Th17       | 6.1 (4.3, 8.5)       | 6.1 (4.3, 8.4)       | 6.2 (4.6, 8.9)       | 0.2   | 0.6631 | 0     | 1      |
| HLA-DR+ CD38+ Th17 | 2.05 (1.27, 3.37)    | 1.95 (1.25, 3.23)    | 2.24 (1.37, 3.73)    | 0.19  | 0.3314 | 0.16  | 0.4363 |
| Ki67+ Th17         | 1.33 (0.79, 1.90)    | 1.40 (0.79, 2.02)    | 1.26 (0.90, 1.69)    | -0.2  | 0.2785 | -0.21 | 0.259  |
| PD-1+ Th17         | 15 (11, 20)          | 15 (11, 20)          | 15 (11, 19)          | 0.2   | 0.8552 | 0.1   | 0.9273 |
| TCF-1+ Th17        | 75 (61, 85)          | 75 (61, 84)          | 74 (61, 87)          | 1     | 0.6649 | 1     | 0.6827 |

**Table S3.10**

**Regulatory T cell distribution for Vag Biopsy FBS/DMSO specimen comparing BV positive vs negative**

| Characteristic            | Expected |         | N   | BV Positive | BV Negative |
|---------------------------|----------|---------|-----|-------------|-------------|
|                           | Max N    | Missing |     |             |             |
| live CD45+                | 197      | 0       | 197 | 61          | 136         |
| CD3+                      | 197      | 6       | 191 | 58          | 133         |
| CD4+ CD8-                 | 191      | 17      | 174 | 50          | 124         |
| CD25+ CD127<br>low        | 174      | 17      | 157 | 42          | 115         |
| Foxp3+                    | 157      | 107     | 50  | 15          | 35          |
| CCR5+ Tregs               | 50       | 29      | 21  | 5           | 16          |
| CCR6+ Tregs               | 50       | 29      | 21  | 5           | 16          |
| CCR7+<br>CD45RA+<br>Tregs | 50       | 29      | 21  | 5           | 16          |
| CCR7+<br>CD45RA-<br>Tregs | 50       | 29      | 21  | 5           | 16          |
| CCR7-<br>CD45RA+<br>Tregs | 50       | 29      | 21  | 5           | 16          |
| CCR7-<br>CD45RA-<br>Tregs | 50       | 29      | 21  | 5           | 16          |
| CD38+ Tregs               | 50       | 29      | 21  | 5           | 16          |
| CD39+ Tregs               | 50       | 29      | 21  | 5           | 16          |



|                        |    |    |    |   |    |
|------------------------|----|----|----|---|----|
| CD69+ Tregs            | 50 | 29 | 21 | 5 | 16 |
| CD101+ Tregs           | 50 | 29 | 21 | 5 | 16 |
| CD103+<br>CD69+ Tregs  | 50 | 29 | 21 | 5 | 16 |
| CD103+ CD69-<br>Tregs  | 50 | 29 | 21 | 5 | 16 |
| CD103-<br>CD69+ Tregs  | 50 | 29 | 21 | 5 | 16 |
| CD103- CD69-<br>Tregs  | 50 | 29 | 21 | 5 | 16 |
| CTLA-4+<br>Tregs       | 50 | 29 | 21 | 5 | 16 |
| CXCR3+<br>Tregs        | 50 | 29 | 21 | 5 | 16 |
| GrzB+ Tregs            | 50 | 29 | 21 | 5 | 16 |
| HLA-DR+<br>Tregs       | 50 | 29 | 21 | 5 | 16 |
| HLA-DR+<br>CD38+ Tregs | 50 | 29 | 21 | 5 | 16 |
| Ki67+ Tregs            | 50 | 40 | 10 | 0 | 10 |
| PD-1+ Tregs            | 50 | 29 | 21 | 5 | 16 |
| PD-1+TCF-1-<br>Tregs   | 50 | 29 | 21 | 5 | 16 |
| TCF-1+ Tregs           | 50 | 29 | 21 | 5 | 16 |
| Tbet+ (Th1)            | 50 | 29 | 21 | 5 | 16 |
| CD161+<br>CCR6+ (Th17) | 50 | 29 | 21 | 5 | 16 |

**A regression model estimating the association of BV status (Positive vs Negative) with regulatory T cells' concentration from Vag Biopsy FBS/DMSO specimen, adjusted for hormonal contraceptive use, semen exposure, HIV exposure, and HSV2 status**

| Treg cells          | Overall           | BV                |                   | Unadjusted Beta | Unadjusted p-value | Adjusted Beta | Adjusted p-value |
|---------------------|-------------------|-------------------|-------------------|-----------------|--------------------|---------------|------------------|
|                     |                   | Negative          | BV Positive       |                 |                    |               |                  |
| live CD45+          | 0.88 (0.30, 1.99) | 0.89 (0.36, 2.07) | 0.75 (0.13, 1.75) | -0.19           | 0.158              | -0.21         | 0.1762           |
| CD3+                | 78 (64, 88)       | 77 (63, 87)       | 83 (70, 89)       | 4.1             | 0.0878             | 4.87          | 0.0485           |
| CD4+ CD8-           | 43 (31, 56)       | 45 (33, 58)       | 37 (27, 50)       | -6.9            | 0.0312             | -7.18         | 0.0303           |
| CD25+ CD127 low     | 6.4 (3.8, 9.4)    | 6.5 (3.6, 10.2)   | 6.2 (4.3, 8.4)    | -0.13           | 0.874              | 0.27          | 0.7366           |
| Foxp3+              | 44 (34, 57)       | 46 (36, 62)       | 42 (27, 49)       | -8.6            | 0.1681             | -7.83         | 0.1491           |
| CCR5+ Tregs         | 88 (67, 94)       | 81 (63, 94)       | 92 (89, 94)       | 11.25           | 0.303              | 28.47         | 0.0815           |
| CCR6+ Tregs         | 14 (8, 19)        | 14 (8, 20)        | 16 (11, 19)       | 2.34            | 0.6915             | 11.23         | 0.0808           |
| CCR7+ CD45RA+ Tregs | 0.0 (0.0, 2.9)    | 0.3 (0.0, 1.8)    | 0.0 (0.0, 3.0)    | 0               | 1                  | 0             | 1                |
| CCR7+ CD45RA- Tregs | 10 (8, 20)        | 9 (8, 20)         | 11 (9, 33)        | 2.33            | 0.6688             | 3.38          | 0.5778           |
| CCR7- CD45RA+ Tregs | 0.00 (0.00, 2.50) | 0.39 (0.00, 2.59) | 0.00 (0.00, 0.00) | 0               | 1                  | -2            | 0.0883           |
| CCR7- CD45RA- Tregs | 83 (73, 91)       | 82 (76, 91)       | 89 (64, 92)       | -1.09           | 0.8888             | 4.54          | 0.6457           |
| CD38+ Tregs         | 13 (9, 23)        | 11 (7, 25)        | 13 (10, 21)       | 0.21            | 0.969              | -4.08         | 0.5579           |
| CD39+ Tregs         | 76 (54, 86)       | 80 (52, 89)       | 74 (62, 85)       | -3.36           | 0.7618             | 13.17         | 0.3921           |
| CD69+ Tregs         | 77 (62, 81)       | 76 (48, 82)       | 77 (76, 79)       | -0.41           | 0.9637             | 22.58         | 0.2187           |

|                        |                   |                   |                   |    |        |        |        |        |
|------------------------|-------------------|-------------------|-------------------|----|--------|--------|--------|--------|
| CD101+ Tregs           | 27 (15, 57)       | 27 (15, 58)       | 27 (23, 47)       |    | 1.97   | 0.8828 | 21.5   | 0.2558 |
| CD103+                 |                   |                   |                   |    |        |        |        |        |
| CD69+ Tregs            | 13 (3, 20)        | 17 (3, 29)        | 11 (6, 13)        |    | -4.35  | 0.6032 | -3.44  | 0.8117 |
| CD103+ CD69-<br>Tregs  | 0.00 (0.00, 1.96) | 0.06 (0.00, 2.06) | 0.00 (0.00, 0.00) |    | 0      | 1      | -0.96  | 0.3479 |
| CD103-<br>CD69+ Tregs  | 61 (37, 65)       | 48 (34, 64)       | 65 (64, 68)       |    | 17.93  | 0.1673 | 30.6   | 0.0313 |
| CD103- CD69-<br>Tregs  | 23 (18, 37)       | 23 (17, 44)       | 23 (21, 24)       |    | 0      | 1      | -13.77 | 0.4187 |
| CTLA-4+<br>Tregs       | 50 (18, 71)       | 55 (17, 73)       | 36 (21, 39)       |    | -15.5  | 0.393  | 2.31   | 0.9208 |
| CXCR3+<br>Tregs        | 41 (26, 63)       | 32 (20, 44)       | 74 (70, 87)       |    | 41.07  | 0.0004 | 40.95  | 0.0039 |
| GrzB+ Tregs            | 0.00 (0.00, 1.96) | 0.00 (0.00, 0.00) | 2.13 (0.00, 3.03) |    | 1.18   | 0.993  | 0      | 1      |
| HLA-DR+<br>Tregs       | 58 (50, 83)       | 62 (52, 84)       | 52 (40, 52)       |    | -15.31 | 0.1251 | -0.53  | 0.974  |
| HLA-DR+<br>CD38+ Tregs | 9 (6, 19)         | 9 (7, 22)         | 9 (6, 11)         |    | -0.67  | 0.8553 | -6.31  | 0.3472 |
| Ki67+ Tregs            | 3.7 (1.7, 7.4)    | 3.7 (1.7, 7.4)    | NA (NA, NA)       | NA | NA     | NA     | NA     | NA     |
| PD-1+ Tregs            | 61 (44, 72)       | 50 (36, 71)       | 68 (64, 75)       |    | 17.7   | 0.1675 | 17.3   | 0.2308 |
| PD-1+TCF-1-<br>Tregs   | 50 (27, 64)       | 46 (24, 55)       | 64 (57, 68)       |    | 22.37  | 0.092  | 23.95  | 0.055  |
| TCF-1+ Tregs           | 10 (4, 23)        | 11 (5, 24)        | 5 (0, 8)          |    | -5.25  | 0.3719 | -10.33 | 0.0722 |
| Tbet+ (Th1)            | 3 (1, 14)         | 3 (1, 8)          | 3 (3, 19)         |    | 1.23   | 0.6415 | -0.54  | 0.9004 |
| CD161+<br>CCR6+ (Th17) | 6 (3, 12)         | 5 (3, 12)         | 8 (6, 18)         |    | 3.23   | 0.4219 | 11.52  | 0.0551 |

**Table S3.11**

**Regulatory T cell distribution for EctoCx Biopsy FBS/DMSO specimen  
comparing BV positive vs negative**

| Characteristic            | Expected |         | N   | BV Positive |    | BV Negative |  |
|---------------------------|----------|---------|-----|-------------|----|-------------|--|
|                           | Max N    | Missing |     |             |    |             |  |
| live CD45+                | 197      |         | 0   | 197         | 59 | 138         |  |
| CD3+                      | 197      |         | 3   | 194         | 59 | 135         |  |
| CD4+ CD8-                 | 194      |         | 16  | 178         | 52 | 126         |  |
| CD25+ CD127<br>low        | 178      |         | 13  | 165         | 47 | 118         |  |
| Foxp3+                    | 165      |         | 107 | 58          | 17 | 41          |  |
| CCR5+ Tregs               | 58       |         | 29  | 29          | 11 | 18          |  |
| CCR6+ Tregs               | 58       |         | 29  | 29          | 11 | 18          |  |
| CCR7+<br>CD45RA+<br>Tregs | 58       |         | 29  | 29          | 11 | 18          |  |
| CCR7+<br>CD45RA- Tregs    | 58       |         | 29  | 29          | 11 | 18          |  |
| CCR7-<br>CD45RA+<br>Tregs | 58       |         | 29  | 29          | 11 | 18          |  |
| CCR7-<br>CD45RA- Tregs    | 58       |         | 29  | 29          | 11 | 18          |  |
| CD38+ Tregs               | 58       |         | 29  | 29          | 11 | 18          |  |
| CD39+ Tregs               | 58       |         | 29  | 29          | 11 | 18          |  |

|                     |    |    |    |    |    |
|---------------------|----|----|----|----|----|
| CD69+ Tregs         | 58 | 29 | 29 | 11 | 18 |
| CD101+ Tregs        | 58 | 29 | 29 | 11 | 18 |
| CD103+ CD69+ Tregs  | 58 | 29 | 29 | 11 | 18 |
| CD103+ CD69- Tregs  | 58 | 29 | 29 | 11 | 18 |
| CD103- CD69+ Tregs  | 58 | 29 | 29 | 11 | 18 |
| CD103- CD69- Tregs  | 58 | 29 | 29 | 11 | 18 |
| CTLA-4+ Tregs       | 58 | 29 | 29 | 11 | 18 |
| CXCR3+ Tregs        | 58 | 29 | 29 | 11 | 18 |
| GrzB+ Tregs         | 58 | 29 | 29 | 11 | 18 |
| HLA-DR+ Tregs       | 58 | 29 | 29 | 11 | 18 |
| HLA-DR+ CD38+ Tregs | 58 | 29 | 29 | 11 | 18 |
| Ki67+ Tregs         | 58 | 47 | 11 | 3  | 8  |
| PD-1+ Tregs         | 58 | 29 | 29 | 11 | 18 |
| PD-1+TCF-1- Tregs   | 58 | 29 | 29 | 11 | 18 |
| TCF-1+ Tregs        | 58 | 29 | 29 | 11 | 18 |
| Tbet+ (Th1)         | 58 | 29 | 29 | 11 | 18 |
| CD161+ CCR6+ (Th17) | 58 | 29 | 29 | 11 | 18 |

**A regression model estimating the association of BV status (Positive vs Negative) with regulatory T cells' concentration from EctoCx Biopsy FBS/DMSO specimen, adjusted for hormonal contraceptive use, semen exposure, HIV exposure, and HSV2 status**

| Treg cells                | Overall              | BV<br>Negative       | BV Positive          | Unadjusted<br>Beta | Unadjusted p-<br>value | Adjusted<br>Beta | Adjusted<br>p-value |
|---------------------------|----------------------|----------------------|----------------------|--------------------|------------------------|------------------|---------------------|
| live CD45+                | 1.1 (0.3,<br>2.9)    | 1.1 (0.3,<br>2.6)    | 1.0 (0.2,<br>3.0)    | 0                  | 1                      | -0.02            | 0.9361              |
| CD3+                      | 76 (67, 83)          | 77 (67, 83)          | 75 (68, 84)          | 0.3                | 0.8829                 | 0.31             | 0.886               |
| CD4+ CD8-                 | 51 (39, 60)          | 50 (39, 59)          | 51 (37, 62)          | 1.2                | 0.6645                 | 0.81             | 0.7745              |
| CD25+ CD127<br>low        | 6.3 (4.2,<br>10.1)   | 6.3 (4.2,<br>9.9)    | 5.9 (4.0,<br>10.3)   | 0.08               | 0.9099                 | 0.28             | 0.7147              |
| Foxp3+                    | 47 (36, 61)          | 44 (36, 61)          | 52 (40, 64)          | 6                  | 0.345                  | 2.36             | 0.724               |
| CCR5+ Tregs               | 86 (63, 93)          | 89 (64, 94)          | 81 (68, 88)          | -4.3               | 0.4632                 | 4                | 0.6465              |
| CCR6+ Tregs               | 13 (7, 19)           | 17 (8, 24)           | 10 (7, 13)           | -5.67              | 0.1792                 | -6.33            | 0.2215              |
| CCR7+<br>CD45RA+<br>Tregs | 0.5 (0.0,<br>3.7)    | 0.3 (0.0,<br>3.5)    | 0.8 (0.1,<br>4.4)    | 0.23               | 0.769                  | -0.23            | 0.8672              |
| CCR7+<br>CD45RA- Tregs    | 8 (6, 13)            | 8 (6, 11)            | 7 (5, 14)            | -0.12              | 0.9651                 | 1.33             | 0.6941              |
| CCR7-<br>CD45RA+<br>Tregs | 1.7 (0.3,<br>3.9)    | 1.5 (0.1,<br>3.3)    | 1.8 (1.1,<br>5.6)    | 0.59               | 0.5394                 | 0.99             | 0.524               |
| CCR7-<br>CD45RA- Tregs    | 87 (77, 92)          | 87 (79, 92)          | 86 (77, 93)          | 0.43               | 0.9173                 | -1.64            | 0.729               |
| CD38+ Tregs               | 21 (12, 39)          | 15 (11, 26)          | 39 (27, 41)          | 18.86              | 0.0055                 | 15.93            | 0.023               |
| CD39+ Tregs               | 73 (59, 89)          | 74 (62, 85)          | 73 (42, 89)          | -1.47              | 0.8692                 | -13.62           | 0.2674              |
| CD69+ Tregs               | 75 (47, 88)          | 81 (49, 90)          | 65 (49, 81)          | -6.4               | 0.486                  | 2.28             | 0.8856              |
| CD101+ Tregs              | 19 (6, 43)           | 15 (4, 44)           | 20 (11, 33)          | 4.54               | 0.5604                 | 7.18             | 0.3822              |
| CD103+ CD69+<br>Tregs     | 10 (2, 21)           | 10 (4, 28)           | 10 (1, 11)           | -3.9               | 0.3474                 | -1.62            | 0.7558              |
| CD103+ CD69-<br>Tregs     | 0.00 (0.00,<br>0.00) | 0.00 (0.00,<br>0.00) | 0.00 (0.00,<br>0.35) | 0                  | 1                      | 0                | 1                   |

|                     |                   |                   |                   |       |        |       |        |
|---------------------|-------------------|-------------------|-------------------|-------|--------|-------|--------|
| CD103- CD69+ Tregs  | 52 (39, 73)       | 47 (40, 72)       | 56 (35, 71)       | 3.01  | 0.7713 | 7.4   | 0.6464 |
| CD103- CD69- Tregs  | 25 (13, 53)       | 19 (10, 51)       | 35 (18, 53)       | 6.13  | 0.513  | -1.62 | 0.9112 |
| CTLA-4+ Tregs       | 59 (33, 70)       | 58 (39, 70)       | 61 (31, 72)       | -1.42 | 0.8767 | -3.51 | 0.803  |
| CXCR3+ Tregs        | 39 (29, 57)       | 39 (27, 51)       | 44 (30, 59)       | 2.04  | 0.838  | 5.59  | 0.5795 |
| GrzB+ Tregs         | 0.55 (0.00, 2.61) | 0.28 (0.00, 2.65) | 0.62 (0.00, 2.37) | 0     | 1      | 0.05  | 0.9502 |
| HLA-DR+ Tregs       | 53 (32, 75)       | 52 (32, 73)       | 54 (32, 69)       | 0.91  | 0.9256 | -1.31 | 0.9022 |
| HLA-DR+ CD38+ Tregs | 14 (6, 19)        | 9 (3, 19)         | 16 (14, 29)       | 9.63  | 0.0411 | 5.48  | 0.3046 |
| Ki67+ Tregs         | 4 (3, 11)         | 3 (2, 6)          | 10 (8, 15)        | 6.81  | 0.0641 | 7     | 0.0101 |
| PD-1+ Tregs         | 62 (43, 76)       | 58 (43, 77)       | 68 (55, 71)       | 4     | 0.6976 | 3.24  | 0.8551 |
| PD-1+TCF-1- Tregs   | 54 (38, 67)       | 51 (38, 67)       | 64 (36, 65)       | 6.46  | 0.475  | 1.93  | 0.8906 |
| TCF-1+ Tregs        | 11 (6, 19)        | 9 (3, 16)         | 13 (9, 29)        | 6.51  | 0.1014 | 3.63  | 0.4851 |
| Tbet+ (Th1)         | 6 (3, 14)         | 6 (3, 15)         | 6 (2, 13)         | -0.36 | 0.8943 | -1    | 0.7644 |
| CD161+ CCR6+ (Th17) | 7 (3, 11)         | 8 (5, 12)         | 6 (3, 8)          | -2.34 | 0.3162 | -2.53 | 0.3964 |

**Table S3.12**

**Regulatory T cell distribution for PBMC ACD specimen comparing BV positive vs negative**

| Characteristic            | Expected |         | N   | BV Positive | BV Negative |
|---------------------------|----------|---------|-----|-------------|-------------|
|                           | Max N    | Missing |     |             |             |
| live CD45+                | 200      | 0       | 200 | 60          | 140         |
| CD3+                      | 200      | 0       | 200 | 60          | 140         |
| CD4+ CD8-                 | 200      | 0       | 200 | 60          | 140         |
| CD25+ CD127<br>low        | 200      | 0       | 200 | 60          | 140         |
| Foxp3+                    | 200      | 0       | 200 | 60          | 140         |
| CCR5+ Tregs               | 200      | 0       | 200 | 60          | 140         |
| CCR6+ Tregs               | 200      | 0       | 200 | 60          | 140         |
| CCR7+<br>CD45RA+<br>Tregs | 200      | 0       | 200 | 60          | 140         |
| CCR7+<br>CD45RA- Tregs    | 200      | 0       | 200 | 60          | 140         |
| CCR7-<br>CD45RA+<br>Tregs | 200      | 0       | 200 | 60          | 140         |
| CCR7-<br>CD45RA- Tregs    | 200      | 0       | 200 | 60          | 140         |
| CD38+ Tregs               | 200      | 0       | 200 | 60          | 140         |
| CD39+ Tregs               | 200      | 0       | 200 | 60          | 140         |



|                     |     |     |     |    |     |
|---------------------|-----|-----|-----|----|-----|
| CD69+ Tregs         | 200 | 0   | 200 | 60 | 140 |
| CD101+ Tregs        | 200 | 0   | 200 | 60 | 140 |
| CD103+ CD69+ Tregs  | 200 | 0   | 200 | 60 | 140 |
| CD103+ CD69- Tregs  | 200 | 0   | 200 | 60 | 140 |
| CD103- CD69+ Tregs  | 200 | 0   | 200 | 60 | 140 |
| CD103- CD69- Tregs  | 200 | 0   | 200 | 60 | 140 |
| CTLA-4+ Tregs       | 200 | 0   | 200 | 60 | 140 |
| CXCR3+ Tregs        | 200 | 0   | 200 | 60 | 140 |
| GrzB+ Tregs         | 200 | 0   | 200 | 60 | 140 |
| HLA-DR+ Tregs       | 200 | 0   | 200 | 60 | 140 |
| HLA-DR+ CD38+ Tregs | 200 | 0   | 200 | 60 | 140 |
| Ki67+ Tregs         | 200 | 120 | 80  | 22 | 58  |
| PD-1+ Tregs         | 200 | 0   | 200 | 60 | 140 |
| PD-1+TCF-1- Tregs   | 200 | 0   | 200 | 60 | 140 |
| TCF-1+ Tregs        | 200 | 0   | 200 | 60 | 140 |
| Tbet+ (Th1)         | 200 | 0   | 200 | 60 | 140 |
| CD161+ CCR6+ (Th17) | 200 | 0   | 200 | 60 | 140 |

**A regression model estimating the association of BV status (Positive vs Negative) with regulatory T cells' concentration from PBMC ACD specimen, adjusted for hormonal contraceptive use**

|                           | Overall           | BV<br>Negative    | BV Positive       | Unadjusted<br>Beta | Unadjusted p-<br>value | Adjusted<br>Beta | Adjusted<br>p-value |
|---------------------------|-------------------|-------------------|-------------------|--------------------|------------------------|------------------|---------------------|
| Treg cells                |                   |                   |                   |                    |                        |                  |                     |
| live CD45+                | 93 (90, 95)       | 93 (91, 95)       | 93 (87, 95)       | -0.8               | 0.1411                 | -0.6             | 0.2906              |
| CD3+                      | 74 (67, 78)       | 73 (67, 78)       | 75 (68, 80)       | 2.1                | 0.1137                 | 1.9              | 0.1787              |
| CD4+ CD8-                 | 63 (57, 69)       | 62 (58, 69)       | 63 (57, 67)       | -0.4               | 0.7584                 | -0.4             | 0.7636              |
| CD25+ CD127<br>low        | 3.66 (2.96, 4.76) | 3.63 (2.96, 4.83) | 3.66 (3.07, 4.58) | -0.03              | 0.8937                 | 0.03             | 0.9141              |
| Foxp3+                    | 54 (45, 64)       | 52 (45, 63)       | 56 (49, 65)       | 3.4                | 0.1259                 | 2.2              | 0.3141              |
| CCR5+ Tregs               | 27 (22, 36)       | 27 (23, 37)       | 26 (20, 34)       | -1.8               | 0.2776                 | -2.4             | 0.1681              |
| CCR6+ Tregs               | 13 (8, 17)        | 13 (8, 18)        | 13 (8, 17)        | -0.25              | 0.8188                 | -0.49            | 0.6491              |
| CCR7+<br>CD45RA+<br>Tregs | 12 (7, 17)        | 11 (8, 16)        | 13 (7, 19)        | 1.33               | 0.2151                 | 1.22             | 0.2507              |
| CCR7+<br>CD45RA- Tregs    | 9.3 (6.2, 12.9)   | 9.3 (6.4, 12.7)   | 8.9 (5.3, 14.9)   | -0.4               | 0.5985                 | -0.1             | 0.8964              |
| CCR7-<br>CD45RA+<br>Tregs | 13 (10, 18)       | 13 (9, 18)        | 14 (10, 19)       | 0.9                | 0.3772                 | 1.18             | 0.2729              |
| CCR7-<br>CD45RA- Tregs    | 63 (54, 72)       | 64 (57, 72)       | 60 (52, 71)       | -3                 | 0.119                  | -3.4             | 0.0853              |
| CD38+ Tregs               | 15 (11, 21)       | 15 (11, 20)       | 15 (12, 21)       | 0.3                | 0.7796                 | 0.6              | 0.5933              |
| CD39+ Tregs               | 46 (30, 56)       | 45 (28, 55)       | 48 (33, 57)       | 2.14               | 0.4434                 | 1.8              | 0.5318              |
| CD69+ Tregs               | 1.43 (0.97, 2.14) | 1.43 (0.97, 2.16) | 1.41 (0.84, 2.08) | -0.08              | 0.5702                 | -0.11            | 0.4542              |

|                     |                      |                      |                      |       |        |       |        |
|---------------------|----------------------|----------------------|----------------------|-------|--------|-------|--------|
| CD101+ Tregs        | 12 (5, 18)           | 13 (5, 21)           | 12 (5, 17)           | -0.71 | 0.5805 | -0.65 | 0.6303 |
| CD103+ CD69+ Tregs  | 0.00 (0.00, 0.05)    | 0.00 (0.00, 0.01)    | 0.00 (0.00, 0.09)    | 0     | 1      | 0     | 1      |
| CD103+ CD69- Tregs  | 1.14 (0.69, 1.81)    | 1.19 (0.73, 1.76)    | 1.06 (0.62, 2.02)    | -0.07 | 0.5507 | -0.09 | 0.4736 |
| CD103- CD69+ Tregs  | 1.40 (0.90, 2.03)    | 1.42 (0.94, 2.08)    | 1.35 (0.80, 1.88)    | -0.13 | 0.3114 | -0.12 | 0.3632 |
| CD103- CD69- Tregs  | 97.35 (96.28, 98.00) | 97.20 (96.30, 97.93) | 97.80 (96.13, 98.10) | 0.2   | 0.2444 | 0.3   | 0.1113 |
| CTLA-4+ Tregs       | 18 (12, 24)          | 19 (13, 25)          | 15 (11, 22)          | -3.5  | 0.0102 | -3.7  | 0.0102 |
| CXCR3+ Tregs        | 18 (12, 26)          | 19 (13, 27)          | 18 (9, 25)           | -1.8  | 0.3023 | -2.6  | 0.1533 |
| GrzB+ Tregs         | 0.76 (0.40, 1.77)    | 0.83 (0.49, 2.01)    | 0.54 (0.27, 1.21)    | -0.29 | 0.014  | -0.3  | 0.0157 |
| HLA-DR+ Tregs       | 25 (21, 32)          | 26 (21, 34)          | 24 (21, 31)          | -0.8  | 0.5595 | -1.35 | 0.3451 |
| HLA-DR+ CD38+ Tregs | 4.30 (3.18, 6.16)    | 4.33 (3.18, 5.91)    | 4.23 (3.23, 6.49)    | 0.08  | 0.8148 | 0     | 0.9998 |
| Ki67+ Tregs         | 2.58 (1.86, 3.78)    | 2.63 (1.95, 3.86)    | 2.43 (1.67, 3.50)    | -0.28 | 0.4534 | -0.19 | 0.6029 |
| PD-1+ Tregs         | 8.4 (6.0, 10.7)      | 8.4 (6.1, 10.7)      | 8.4 (5.4, 10.5)      | 0     | 1      | -0.12 | 0.845  |
| PD-1+TCF-1- Tregs   | 6.2 (4.0, 8.3)       | 6.4 (4.1, 8.7)       | 5.7 (3.7, 7.9)       | -0.57 | 0.2974 | -0.63 | 0.2582 |
| TCF-1+ Tregs        | 34 (21, 45)          | 32 (20, 44)          | 36 (26, 51)          | 5.9   | 0.0335 | 5.9   | 0.0408 |
| Tbet+ (Th1)         | 1.61 (0.85, 3.17)    | 1.67 (0.98, 3.23)    | 1.47 (0.80, 2.68)    | -0.2  | 0.3581 | -0.27 | 0.2362 |
| CD161+ CCR6+ (Th17) | 2.98 (1.80, 4.34)    | 2.98 (1.90, 4.41)    | 2.96 (1.48, 3.94)    | -0.32 | 0.2831 | -0.35 | 0.248  |
