# Supplementary material for: Bacterial vaginosis-driven changes in cervicovaginal immunity that expand the immunological hypothesis for increased HIV susceptibility
Source: PubMed Central journal article supplement — bioRxiv. 2025 Jan 14:2024.07.03.601916. Originally published 2024 Jul 5. Preprint. [Version 2] doi: 10.1101/2024.07.03.601916 (PMC11245000; doi:10.1101/2024.07.03.601916), 2025-01-14
Supplement: media-5.pdf [file media-5.pdf]

**Table S4.1**

bv0 = BV negative  
 bv1 = BV positive  
 beta = estimated difference

**Softcup cytokine and chemokine analysis - greater than or equal to 80% of samples detectable**

| cytokine/<br>chemokine | bv0 n | bv0 mean          |       | bv1 mean          |                    | unadjusted             |                       | adjusted |                        | adjusted p-value |
|------------------------|-------|-------------------|-------|-------------------|--------------------|------------------------|-----------------------|----------|------------------------|------------------|
|                        |       | log10<br>quantity | bv1 n | log10<br>quantity | unadjusted<br>beta | confidence<br>interval | unadjusted<br>p-value | beta     | confidence<br>interval |                  |
| IL.1B                  | 128   | 2.91              | 53    | 2.947             | 0.037              | ( -0.265 ,<br>0.338 )  | 0.809                 | 0.042    | ( -0.270 ,<br>0.354 )  | 0.791            |
| IL.6                   | 128   | 2.511             | 53    | 2.348             | -0.163             | ( -0.416 ,<br>0.091 )  | 0.207                 | -0.134   | ( -0.397 ,<br>0.128 )  | 0.314            |
| IL.8                   | 128   | 3.923             | 53    | 3.845             | -0.078             | ( -0.169 ,<br>0.013 )  | 0.092                 | -0.067   | ( -0.162 ,<br>0.027 )  | 0.16             |
| RANTES                 | 128   | 1.726             | 53    | 1.591             | -0.136             | ( -0.381 ,<br>0.109 )  | 0.276                 | -0.105   | ( -0.359 ,<br>0.149 )  | 0.416            |
| sCD40L                 | 128   | 1.755             | 53    | 1.817             | 0.062              | ( -0.088 ,<br>0.212 )  | 0.416                 | 0.081    | ( -0.074 ,<br>0.237 )  | 0.303            |
| EGF                    | 128   | 1.933             | 53    | 1.972             | 0.04               | ( -0.161 ,<br>0.241 )  | 0.697                 | 0.086    | ( -0.120 ,<br>0.291 )  | 0.413            |
| Eotaxin                | 128   | 1.203             | 53    | 1.278             | 0.074              | ( 0.013 ,<br>0.136 )   | 0.019                 | 0.065    | ( 0.001 ,<br>0.129 )   | 0.048            |
| FGF.2                  | 128   | 1.891             | 53    | 1.837             | -0.054             | ( -0.230 ,<br>0.123 )  | 0.549                 | -0.051   | ( -0.233 ,<br>0.131 )  | 0.584            |
| FLT.3L                 | 128   | 1.263             | 53    | 1.3               | 0.038              | ( -0.100 ,<br>0.175 )  | 0.589                 | 0.05     | ( -0.090 ,<br>0.190 )  | 0.478            |
| Fractalkine            | 128   | 1.715             | 53    | 1.79              | 0.075              | ( -0.051 ,<br>0.201 )  | 0.241                 | 0.085    | ( -0.046 ,<br>0.216 )  | 0.204            |
| G.CSF                  | 128   | 3.72              | 53    | 3.743             | 0.023              | ( -0.274 ,<br>0.321 )  | 0.877                 | 0.026    | ( -0.285 ,<br>0.337 )  | 0.869            |

|                  |     |        |    |        |                              |       |                              |       |
|------------------|-----|--------|----|--------|------------------------------|-------|------------------------------|-------|
| GROa             | 128 | 3.765  | 53 | 3.425  | ( -0.726 ,<br>-0.34 0.047 )  | 0.085 | ( -0.767 ,<br>-0.363 0.041 ) | 0.078 |
| IFN.a2           | 128 | 0.867  | 53 | 1.021  | ( -0.085 ,<br>0.154 0.393 )  | 0.205 | ( -0.048 ,<br>0.199 0.446 )  | 0.113 |
| IFNg             | 128 | 0.515  | 53 | 0.39   | ( -0.377 ,<br>-0.125 0.127 ) | 0.329 | ( -0.383 ,<br>-0.122 0.140 ) | 0.361 |
| IL.1a            | 128 | 3.724  | 53 | 3.643  | ( -0.257 ,<br>-0.081 0.095 ) | 0.367 | ( -0.262 ,<br>-0.079 0.105 ) | 0.399 |
| IL.1RA           | 128 | 4.062  | 53 | 3.949  | ( -0.255 ,<br>-0.113 0.028 ) | 0.116 | ( -0.247 ,<br>-0.101 0.045 ) | 0.173 |
| IL.2             | 127 | 0.245  | 52 | 0.313  | ( -0.147 ,<br>0.068 0.283 )  | 0.534 | ( -0.153 ,<br>0.068 0.288 )  | 0.546 |
| IL.4             | 126 | -0.394 | 51 | -0.402 | ( -0.203 ,<br>-0.009 0.185 ) | 0.93  | ( -0.180 ,<br>0.023 0.226 )  | 0.822 |
| IL.5             | 128 | -0.629 | 53 | -0.665 | ( -0.217 ,<br>-0.036 0.145 ) | 0.694 | ( -0.231 ,<br>-0.042 0.147 ) | 0.659 |
| IL.9             | 128 | 0.607  | 53 | 0.65   | ( -0.111 ,<br>0.043 0.197 )  | 0.584 | ( -0.092 ,<br>0.066 0.225 )  | 0.41  |
| IL.10            | 128 | 0.674  | 53 | 0.624  | ( -0.371 ,<br>-0.05 0.270 )  | 0.758 | ( -0.377 ,<br>-0.044 0.290 ) | 0.795 |
| IL.12p40         | 128 | 1.507  | 53 | 1.56   | ( -0.161 ,<br>0.054 0.268 )  | 0.622 | ( -0.155 ,<br>0.067 0.289 )  | 0.553 |
| IL.12p70         | 128 | 0.319  | 53 | 0.615  | ( 0.030 ,<br>0.296 0.563 )   | 0.029 | ( 0.047 ,<br>0.325 0.604 )   | 0.022 |
| IL.13            | 128 | 1.456  | 53 | 1.536  | ( -0.063 ,<br>0.08 0.223 )   | 0.27  | ( -0.051 ,<br>0.098 0.247 )  | 0.197 |
| IL.15            | 128 | 0.778  | 53 | 0.796  | ( -0.156 ,<br>0.018 0.192 )  | 0.838 | ( -0.169 ,<br>0.011 0.191 )  | 0.907 |
| IL.17A           | 128 | 1.028  | 53 | 0.931  | ( -0.330 ,<br>-0.097 0.136 ) | 0.414 | ( -0.341 ,<br>-0.101 0.139 ) | 0.406 |
| IL.17E_IL.2<br>5 | 128 | 1.002  | 53 | 1.039  | ( -0.072 ,<br>0.036 0.145 )  | 0.51  | ( -0.058 ,<br>0.055 0.168 )  | 0.336 |

|                |     |       |    |       |                                |       |                                |       |
|----------------|-----|-------|----|-------|--------------------------------|-------|--------------------------------|-------|
| IL.17F         | 128 | 1.17  | 53 | 1.111 | ( -0.275 ,<br>-0.06 0.156 )    | 0.585 | ( -0.284 ,<br>-0.059 0.166 )   | 0.603 |
| IL.18          | 128 | 2.547 | 53 | 2.61  | ( -0.212 ,<br>0.063 0.339 )    | 0.65  | ( -0.205 ,<br>0.083 0.371 )    | 0.569 |
| IL.27          | 128 | 1.896 | 53 | 1.955 | ( -0.025 ,<br>0.059 0.143 )    | 0.169 | ( -0.022 ,<br>0.066 0.153 )    | 0.141 |
| IP.10          | 128 | 3.623 | 53 | 3.179 | ( -1.000 ,<br>-0.444 0.112 )   | 0.117 | ( -1.026 ,<br>-0.451 0.124 )   | 0.124 |
| MCP.1          | 128 | 2.915 | 53 | 2.718 | ( -0.418 ,<br>-0.197 0.024 )   | 0.08  | ( -0.426 ,<br>-0.196 0.033 )   | 0.093 |
| MCP.3          | 128 | 0.97  | 53 | 0.871 | ( -0.274 ,<br>-0.099 0.075 )   | 0.263 | ( -0.255 ,<br>-0.073 0.109 )   | 0.428 |
| M.CSF          | 128 | 3.202 | 53 | 3.475 | ( 0.068 ,<br>0.273 0.478 )     | 0.009 | ( 0.045 ,<br>0.255 0.466 )     | 0.018 |
| MDC            | 128 | 2.465 | 53 | 2.393 | ( -0.231 ,<br>-0.072 0.087 )   | 0.373 | ( -0.252 ,<br>-0.088 0.076 )   | 0.292 |
| MIG_CXCL<br>9  | 128 | 3.537 | 53 | 3.339 | ( -0.370 , -<br>-0.198 0.025 ) | 0.025 | ( -0.366 , -<br>-0.186 0.007 ) | 0.041 |
| MIP.1a         | 128 | 1.759 | 53 | 1.637 | ( -0.350 ,<br>-0.123 0.105 )   | 0.289 | ( -0.316 ,<br>-0.08 0.156 )    | 0.504 |
| MIP.1B         | 128 | 1.313 | 53 | 1.229 | ( -0.400 ,<br>-0.084 0.232 )   | 0.601 | ( -0.416 ,<br>-0.086 0.244 )   | 0.606 |
| PDGF.AA        | 128 | 1.6   | 53 | 1.611 | ( -0.221 ,<br>0.011 0.244 )    | 0.924 | ( -0.188 ,<br>0.054 0.295 )    | 0.662 |
| PDGF.AB_<br>BB | 128 | 2.151 | 53 | 2.27  | ( -0.044 ,<br>0.119 0.281 )    | 0.152 | ( -0.030 ,<br>0.138 0.305 )    | 0.106 |
| TGFa           | 128 | 1.509 | 53 | 1.504 | ( -0.099 ,<br>-0.005 0.089 )   | 0.916 | ( -0.104 ,<br>-0.006 0.092 )   | 0.907 |
| TNFa           | 128 | 1.386 | 53 | 1.364 | ( -0.222 ,<br>-0.021 0.179 )   | 0.833 | ( -0.248 ,<br>-0.039 0.169 )   | 0.71  |
| TNFB           | 128 | 1.338 | 53 | 1.329 | ( -0.147 ,<br>-0.009 0.128 )   | 0.895 | ( -0.151 ,<br>-0.007 0.138 )   | 0.929 |

|           |     |       |    |       |                                |       |                                |       |
|-----------|-----|-------|----|-------|--------------------------------|-------|--------------------------------|-------|
| VEGF.A    | 128 | 2.79  | 53 | 2.562 | ( -0.499 ,<br>-0.228 0.044 )   | 0.099 | ( -0.509 ,<br>-0.225 0.059 )   | 0.12  |
| BCA.1     | 128 | 1.557 | 53 | 1.377 | ( -0.438 ,<br>-0.18 0.079 )    | 0.171 | ( -0.422 ,<br>-0.157 0.108 )   | 0.243 |
| ENA.78    | 128 | 3.54  | 53 | 3.379 | ( -0.371 ,<br>-0.161 0.048 )   | 0.131 | ( -0.360 ,<br>-0.143 0.075 )   | 0.197 |
| Eotaxin.2 | 128 | 2.967 | 53 | 2.869 | ( -0.256 ,<br>-0.098 0.061 )   | 0.225 | ( -0.264 ,<br>-0.101 0.063 )   | 0.227 |
| Eotaxin.3 | 128 | 1.183 | 53 | 1.176 | ( -0.161 ,<br>-0.007 0.147 )   | 0.931 | ( -0.167 ,<br>-0.007 0.154 )   | 0.932 |
| I.309     | 128 | 0.182 | 53 | 0.182 | ( -0.146 ,<br>0 0.146 )        | 1     | ( -0.145 ,<br>0.008 0.160 )    | 0.918 |
| IL.16     | 128 | 2.383 | 53 | 2.423 | ( -0.238 ,<br>0.04 0.318 )     | 0.776 | ( -0.209 ,<br>0.08 0.369 )     | 0.586 |
| IL.21     | 128 | 0.641 | 53 | 0.724 | ( 0.003 ,<br>0.084 0.165 )     | 0.043 | ( -0.007 ,<br>0.077 0.160 )    | 0.071 |
| IL.23     | 128 | 1.768 | 53 | 2.065 | ( -0.006 ,<br>0.298 0.601 )    | 0.055 | ( 0.013 ,<br>0.328 0.642 )     | 0.041 |
| IL.33     | 128 | 0.059 | 53 | 0.194 | ( -0.152 ,<br>0.136 0.423 )    | 0.353 | ( -0.184 ,<br>0.114 0.412 )    | 0.45  |
| LIF       | 127 | 1.074 | 53 | 1.441 | ( 0.128 ,<br>0.367 0.607 )     | 0.003 | ( 0.143 ,<br>0.388 0.633 )     | 0.002 |
| MCP.2     | 128 | 1.226 | 53 | 1.183 | ( -0.207 ,<br>-0.043 0.122 )   | 0.61  | ( -0.213 ,<br>-0.043 0.127 )   | 0.615 |
| MCP.4     | 128 | 0.961 | 53 | 1.073 | ( -0.071 ,<br>0.112 0.296 )    | 0.228 | ( -0.115 ,<br>0.074 0.262 )    | 0.44  |
| MIP.1d    | 128 | 2.453 | 53 | 2.421 | ( -0.233 ,<br>-0.031 0.171 )   | 0.759 | ( -0.253 ,<br>-0.045 0.163 )   | 0.67  |
| TARC      | 126 | 0.849 | 53 | 0.595 | ( -0.468 , -<br>-0.254 0.041 ) | 0.02  | ( -0.477 , -<br>-0.254 0.031 ) | 0.026 |
| TPO       | 128 | 1.513 | 53 | 1.597 | ( -0.083 ,<br>0.083 0.250 )    | 0.323 | ( -0.076 ,<br>0.097 0.271 )    | 0.268 |

|       |     |        |    |        |       |                   |       |       |                   |       |
|-------|-----|--------|----|--------|-------|-------------------|-------|-------|-------------------|-------|
| TRAIL | 128 | 1.385  | 53 | 1.522  | 0.138 | (-0.146 , 0.421 ) | 0.338 | 0.136 | (-0.157 , 0.428 ) | 0.361 |
| TSLP  | 128 | -0.174 | 53 | -0.072 | 0.102 | (-0.078 , 0.282 ) | 0.264 | 0.105 | (-0.081 , 0.290 ) | 0.267 |

**Softcup cytokine and chemokine analysis - less than 80% of samples detectable**

| cytokine/<br>chemokine | percent<br>undetected | percent<br>detected | total n | unadjusted<br>odds ratio | unadjusted<br>confidence<br>interval | unadjusted<br>p-value | adjusted<br>odds ratio | adjusted<br>confidence<br>interval | adjusted p-<br>value |
|------------------------|-----------------------|---------------------|---------|--------------------------|--------------------------------------|-----------------------|------------------------|------------------------------------|----------------------|
| GM.CSF                 | 29.3                  | 70.7                | 181     | 0.94                     | ( 0.471 , 1.925 )                    | 0.863                 | 0.821                  | ( 0.392 , 1.750 )                  | 0.603                |
| IL.3                   | 96.1                  | 3.9                 | 181     | 3.401                    | ( 0.725 , 17.793 )                   | 0.118                 | 3.972                  | ( 0.781 , 22.649 )                 | 0.096                |
| IL.7                   | 59.1                  | 40.9                | 181     | 1.037                    | ( 0.537 , 1.982 )                    | 0.912                 | 1.08                   | ( 0.543 , 2.136 )                  | 0.824                |
| IL.22                  | 20.4                  | 79.6                | 181     | 0.829                    | ( 0.387 , 1.852 )                    | 0.637                 | 0.794                  | ( 0.356 , 1.832 )                  | 0.578                |
| X6CKine                | 83.4                  | 16.6                | 181     | 1.503                    | ( 0.643 , 3.384 )                    | 0.333                 | 1.727                  | ( 0.699 , 4.165 )                  | 0.226                |
| CTACK                  | 22.7                  | 77.3                | 181     | 1.374                    | ( 0.635 , 3.179 )                    | 0.435                 | 1.4                    | ( 0.626 , 3.340 )                  | 0.427                |
| IL.20                  | 26                    | 74                  | 181     | 1.494                    | ( 0.710 , 3.337 )                    | 0.305                 | 1.545                  | ( 0.712 , 3.554 )                  | 0.285                |
| IL.28A                 | 44.8                  | 55.2                | 181     | 1.502                    | ( 0.786 , 2.925 )                    | 0.223                 | 1.533                  | ( 0.771 , 3.103 )                  | 0.227                |
| SCF                    | 59.7                  | 40.3                | 181     | 1.66                     | ( 0.868 , 3.181 )                    | 0.125                 | 1.823                  | ( 0.925 , 3.616 )                  | 0.083                |
| SDF.1a.B               | 27.6                  | 72.4                | 181     | 2.304                    | ( 1.065 , 5.441 )                    | 0.043                 | 2.721                  | ( 1.211 , 6.680 )                  | 0.020                |

**BV negative/positive by softcup cytokine and chemokine undetected/detected 2x2 contingency tables**

GM.CSF

|          |            | percent    |          | percent  |       | percent |
|----------|------------|------------|----------|----------|-------|---------|
| BV       | undetected | undetected | detected | detected | total | total   |
| negative | 37         | 69.80%     | 91       | 71.10%   | 128   | 70.70%  |
| positive | 16         | 30.20%     | 37       | 28.90%   | 53    | 29.30%  |
| TOTAL    |            | 53         | 29.3     | 128      | 70.7  | 181     |

### IL.3

|          |            | percent    |          | percent  |       | percent |
|----------|------------|------------|----------|----------|-------|---------|
| BV       | undetected | undetected | detected | detected | total | total   |
| negative | 125        | 71.80%     | 3        | 42.90%   | 128   | 70.70%  |
| positive | 49         | 28.20%     | 4        | 57.10%   | 53    | 29.30%  |
| TOTAL    |            | 174        | 96.1     | 7        | 3.9   | 181     |

### IL.7

|          |            | percent    |          | percent  |       | percent |
|----------|------------|------------|----------|----------|-------|---------|
| BV       | undetected | undetected | detected | detected | total | total   |
| negative | 76         | 71.00%     | 52       | 70.30%   | 128   | 70.70%  |
| positive | 31         | 29.00%     | 22       | 29.70%   | 53    | 29.30%  |
| TOTAL    |            | 107        | 59.1     | 74       | 40.9  | 181     |

### IL.22

|          |            | percent    |          | percent  |       | percent |
|----------|------------|------------|----------|----------|-------|---------|
| BV       | undetected | undetected | detected | detected | total | total   |
| negative | 25         | 67.60%     | 103      | 71.50%   | 128   | 70.70%  |
| positive | 12         | 32.40%     | 41       | 28.50%   | 53    | 29.30%  |
| TOTAL    |            | 37         | 20.4     | 144      | 79.6  | 181     |

### X6CKine

|          |            | percent    |          | percent  |       | percent |
|----------|------------|------------|----------|----------|-------|---------|
| BV       | undetected | undetected | detected | detected | total | total   |
| negative | 109        | 72.20%     | 19       | 63.30%   | 128   | 70.70%  |
| positive | 42         | 27.80%     | 11       | 36.70%   | 53    | 29.30%  |

|       |     |      |    |      |     |
|-------|-----|------|----|------|-----|
| TOTAL | 151 | 83.4 | 30 | 16.6 | 181 |
|-------|-----|------|----|------|-----|

CTACK

|             | undetected | percent undetected | detected | percent detected | total | percent total |
|-------------|------------|--------------------|----------|------------------|-------|---------------|
| BV negative | 31         | 75.60%             | 97       | 69.30%           | 128   | 70.70%        |
| positive    | 10         | 24.40%             | 43       | 30.70%           | 53    | 29.30%        |
| TOTAL       | 41         | 22.7               | 140      | 77.3             | 181   |               |

IL.20

|             | undetected | percent undetected | detected | percent detected | total | percent total |
|-------------|------------|--------------------|----------|------------------|-------|---------------|
| BV negative | 36         | 76.60%             | 92       | 68.70%           | 128   | 70.70%        |
| positive    | 11         | 23.40%             | 42       | 31.30%           | 53    | 29.30%        |
| TOTAL       | 47         | 26                 | 134      | 74               | 181   |               |

IL.28A

|             | undetected | percent undetected | detected | percent detected | total | percent total |
|-------------|------------|--------------------|----------|------------------|-------|---------------|
| BV negative | 61         | 75.30%             | 67       | 67.00%           | 128   | 70.70%        |
| positive    | 20         | 24.70%             | 33       | 33.00%           | 53    | 29.30%        |
| TOTAL       | 81         | 44.8               | 100      | 55.2             | 181   |               |

SCF

|             | undetected | percent undetected | detected | percent detected | total | percent total |
|-------------|------------|--------------------|----------|------------------|-------|---------------|
| BV negative | 81         | 75.00%             | 47       | 64.40%           | 128   | 70.70%        |
| positive    | 27         | 25.00%             | 26       | 35.60%           | 53    | 29.30%        |
| TOTAL       | 108        | 59.7               | 73       | 40.3             | 181   |               |

SDF.1a.B

|          |            | percent    |          | percent  |       | percent |
|----------|------------|------------|----------|----------|-------|---------|
| BV       | undetected | undetected | detected | detected | total | total   |
| negative | 41         | 82.00%     | 87       | 66.40%   | 128   | 70.70%  |
| positive | 9          | 18.00%     | 44       | 33.60%   | 53    | 29.30%  |
| TOTAL    |            | 50         | 27.6     | 131      | 72.4  | 181     |

#### IL.28A

|          |            | percent    |          | percent  |       | percent |
|----------|------------|------------|----------|----------|-------|---------|
| BV       | undetected | undetected | detected | detected | total | total   |
| negative | 134        | 71.70%     | 15       | 68.20%   | 149   | 71.30%  |
| positive | 53         | 28.30%     | 7        | 31.80%   | 60    | 28.70%  |
| TOTAL    | 187        | 89.5       | 22       | 10.5     | 209   | 100%    |

#### IL.33

|          |            | percent    |          | percent  |       | percent |
|----------|------------|------------|----------|----------|-------|---------|
| BV       | undetected | undetected | detected | detected | total | total   |
| negative | 85         | 72.00%     | 64       | 70.30%   | 149   | 71.30%  |
| positive | 33         | 28.00%     | 27       | 29.70%   | 60    | 28.70%  |
| TOTAL    | 118        | 56.5       | 91       | 43.5     | 209   | 100%    |

#### SCF

|          |            | percent    |          | percent  |       | percent |
|----------|------------|------------|----------|----------|-------|---------|
| BV       | undetected | undetected | detected | detected | total | total   |
| negative | 129        | 71.30%     | 20       | 71.40%   | 149   | 71.30%  |
| positive | 52         | 28.70%     | 8        | 28.60%   | 60    | 28.70%  |
| TOTAL    | 181        | 86.6       | 28       | 13.4     | 209   | 100%    |

#### TSLP

|          |            | percent    |          | percent  |       | percent |
|----------|------------|------------|----------|----------|-------|---------|
| BV       | undetected | undetected | detected | detected | total | total   |
| negative | 88         | 71.00%     | 61       | 71.80%   | 149   | 71.30%  |
| positive | 36         | 29.00%     | 24       | 28.20%   | 60    | 28.70%  |



|       |     |      |    |      |     |      |
|-------|-----|------|----|------|-----|------|
| TOTAL | 124 | 59.3 | 85 | 40.7 | 209 | 100% |
|-------|-----|------|----|------|-----|------|

**Table S4.2**

bv0 = BV negative  
 bv1 = BV positive  
 beta = estimated difference

**Serum cytokine and chemokine analysis - greater than or equal to 80% of samples detectable**

| cytokine/<br>chemokine | bv0 n | bv0 mean          |       | bv1 mean          |        | unadjusted             |                       | adjusted |                        | adjusted<br>p-value |
|------------------------|-------|-------------------|-------|-------------------|--------|------------------------|-----------------------|----------|------------------------|---------------------|
|                        |       | log10<br>quantity | bv1 n | log10<br>quantity | beta   | confidence<br>interval | unadjusted<br>p-value | beta     | confidence<br>interval |                     |
| IL.1B                  | 149   | 0.904             | 60    | 0.806             | -0.099 | ( -0.259 ,<br>0.062 )  | 0.228                 | -0.103   | ( -0.265 ,<br>0.059 )  | 0.211               |
| IL.6                   | 149   | -0.022            | 60    | -0.106            | -0.084 | ( -0.298 ,<br>0.130 )  | 0.441                 | -0.093   | ( -0.308 ,<br>0.122 )  | 0.394               |
| IL.8                   | 149   | 0.842             | 60    | 0.868             | 0.026  | ( -0.078 ,<br>0.130 )  | 0.622                 | 0.03     | ( -0.075 ,<br>0.135 )  | 0.571               |
| sCD40L                 | 149   | 3.596             | 60    | 3.564             | -0.031 | ( -0.117 ,<br>0.054 )  | 0.47                  | -0.022   | ( -0.107 ,<br>0.063 )  | 0.609               |
| EGF                    | 149   | 2.032             | 60    | 2.068             | 0.036  | ( -0.098 ,<br>0.170 )  | 0.596                 | 0.045    | ( -0.089 ,<br>0.179 )  | 0.512               |
| Eotaxin                | 149   | 1.363             | 60    | 1.339             | -0.024 | ( -0.101 ,<br>0.054 )  | 0.546                 | -0.026   | ( -0.104 ,<br>0.052 )  | 0.516               |
| FGF.2                  | 149   | 1.475             | 60    | 1.372             | -0.103 | ( -0.236 ,<br>0.030 )  | 0.127                 | -0.105   | ( -0.239 ,<br>0.029 )  | 0.124               |
| FLT.3L                 | 149   | 1.145             | 60    | 1.239             | 0.094  | ( 0.001 ,<br>0.188 )   | 0.049                 | 0.09     | ( -0.005 ,<br>0.184 )  | 0.063               |
| Fractalkine            | 149   | 2.352             | 60    | 2.282             | -0.07  | ( -0.189 ,<br>0.050 )  | 0.251                 | -0.075   | ( -0.195 ,<br>0.045 )  | 0.218               |
| G.CSF                  | 149   | 1.186             | 60    | 1.063             | -0.123 | ( -0.299 ,<br>0.053 )  | 0.17                  | -0.13    | ( -0.307 ,<br>0.047 )  | 0.148               |
| GROa                   | 149   | 1.896             | 60    | 1.906             | 0.01   | ( -0.062 ,<br>0.082 )  | 0.786                 | 0.018    | ( -0.054 ,<br>0.090 )  | 0.625               |

|                  |     |        |    |        |                              |       |                              |       |
|------------------|-----|--------|----|--------|------------------------------|-------|------------------------------|-------|
| IFN.a2           | 149 | 1.589  | 60 | 1.496  | ( -0.206 ,<br>-0.093 0.021 ) | 0.108 | ( -0.214 ,<br>-0.101 0.013 ) | 0.082 |
| IFNg             | 149 | -0.222 | 60 | -0.252 | ( -0.379 ,<br>-0.03 0.319 )  | 0.866 | ( -0.396 ,<br>-0.044 0.308 ) | 0.805 |
| IL.1a            | 149 | 1.039  | 60 | 0.95   | ( -0.270 ,<br>-0.089 0.092 ) | 0.334 | ( -0.265 ,<br>-0.083 0.100 ) | 0.373 |
| IL.1RA           | 149 | 0.63   | 60 | 0.583  | ( -0.229 ,<br>-0.046 0.136 ) | 0.617 | ( -0.231 ,<br>-0.047 0.137 ) | 0.617 |
| IL.4             | 149 | 0.248  | 60 | 0.176  | ( -0.197 ,<br>-0.072 0.052 ) | 0.254 | ( -0.198 ,<br>-0.072 0.054 ) | 0.262 |
| IL.5             | 149 | 0.292  | 60 | 0.318  | ( -0.168 ,<br>0.025 0.219 )  | 0.797 | ( -0.173 ,<br>0.022 0.217 )  | 0.826 |
| IL.7             | 149 | 0.792  | 60 | 0.692  | ( -0.203 ,<br>-0.1 0.003 )   | 0.058 | ( -0.206 ,<br>-0.102 0.002 ) | 0.055 |
| IL.10            | 149 | -0.116 | 60 | -0.199 | ( -0.334 ,<br>-0.084 0.166 ) | 0.51  | ( -0.327 ,<br>-0.075 0.176 ) | 0.556 |
| IL.12p40         | 149 | 1.533  | 60 | 1.528  | ( -0.200 ,<br>-0.006 0.189 ) | 0.955 | ( -0.204 ,<br>-0.009 0.186 ) | 0.928 |
| IL.13            | 149 | 1.864  | 60 | 1.764  | ( -0.278 ,<br>-0.1 0.078 )   | 0.27  | ( -0.286 ,<br>-0.108 0.071 ) | 0.235 |
| IL.15            | 149 | 0.876  | 60 | 0.872  | ( -0.081 ,<br>-0.004 0.072 ) | 0.913 | ( -0.081 ,<br>-0.004 0.073 ) | 0.921 |
| IL.17E.IL.2<br>5 | 149 | 2.497  | 60 | 2.485  | ( -0.119 ,<br>-0.012 0.095 ) | 0.823 | ( -0.116 ,<br>-0.009 0.099 ) | 0.876 |
| IL.17F           | 149 | 0.889  | 60 | 0.871  | ( -0.374 ,<br>-0.018 0.338 ) | 0.921 | ( -0.389 ,<br>-0.031 0.326 ) | 0.864 |
| IL.18            | 149 | 1.575  | 60 | 1.517  | ( -0.150 ,<br>-0.058 0.035 ) | 0.223 | ( -0.149 ,<br>-0.055 0.038 ) | 0.247 |
| IL.27            | 149 | 3.129  | 60 | 3.162  | ( -0.044 ,<br>0.033 0.110 )  | 0.403 | ( -0.048 ,<br>0.03 0.108 )   | 0.445 |
| IP.10            | 149 | 2.021  | 60 | 2.095  | ( -0.020 ,<br>0.073 0.167 )  | 0.123 | ( -0.022 ,<br>0.072 0.167 )  | 0.132 |

|               |     |       |    |       |                              |       |                              |       |
|---------------|-----|-------|----|-------|------------------------------|-------|------------------------------|-------|
| MCP.1         | 149 | 2.237 | 60 | 2.211 | ( -0.102 ,<br>-0.027 0.049 ) | 0.488 | ( -0.105 ,<br>-0.03 0.046 )  | 0.436 |
| MCP.3         | 149 | 1.183 | 60 | 1.143 | ( -0.147 ,<br>-0.04 0.067 )  | 0.465 | ( -0.150 ,<br>-0.042 0.067 ) | 0.449 |
| MDC           | 149 | 3.287 | 60 | 3.189 | ( -0.218 ,<br>-0.098 0.022 ) | 0.11  | ( -0.219 ,<br>-0.098 0.023 ) | 0.113 |
| MIG_CXCL<br>9 | 149 | 3.304 | 60 | 3.343 | ( -0.043 ,<br>0.04 0.122 )   | 0.346 | ( -0.044 ,<br>0.04 0.123 )   | 0.35  |
| MIP.1         | 149 | 1.595 | 60 | 1.603 | ( -0.173 ,<br>0.008 0.190 )  | 0.929 | ( -0.162 ,<br>0.02 0.202 )   | 0.832 |
| MIP.1B        | 149 | 1.764 | 60 | 1.786 | ( -0.050 ,<br>0.022 0.094 )  | 0.545 | ( -0.047 ,<br>0.025 0.097 )  | 0.5   |
| PDGF.AA       | 149 | 3.504 | 60 | 3.456 | ( -0.105 ,<br>-0.048 0.009 ) | 0.096 | ( -0.101 ,<br>-0.044 0.013 ) | 0.131 |
| TGFa          | 149 | 1.234 | 60 | 1.16  | ( -0.252 ,<br>-0.074 0.104 ) | 0.412 | ( -0.257 ,<br>-0.078 0.102 ) | 0.395 |
| TNFa          | 149 | 1.768 | 60 | 1.739 | ( -0.122 ,<br>-0.029 0.064 ) | 0.536 | ( -0.124 ,<br>-0.031 0.061 ) | 0.506 |
| TNFB          | 149 | 1.079 | 60 | 1.004 | ( -0.199 ,<br>-0.075 0.049 ) | 0.234 | ( -0.204 ,<br>-0.079 0.045 ) | 0.211 |
| VEGF.A        | 149 | 2.373 | 60 | 2.237 | ( -0.277 ,<br>-0.136 0.004 ) | 0.057 | ( -0.272 ,<br>-0.131 0.009 ) | 0.067 |
| BCA.1         | 149 | 1.977 | 60 | 2.011 | ( -0.065 ,<br>0.033 0.132 )  | 0.503 | ( -0.049 ,<br>0.048 0.144 )  | 0.332 |
| CTACK         | 149 | 2.874 | 60 | 2.922 | ( -0.002 ,<br>0.047 0.096 )  | 0.058 | ( -0.001 ,<br>0.048 0.097 )  | 0.053 |
| ENA.78        | 149 | 3.374 | 60 | 3.398 | ( -0.032 ,<br>0.024 0.080 )  | 0.397 | ( -0.032 ,<br>0.025 0.081 )  | 0.393 |
| Eotaxin.2     | 149 | 2.388 | 60 | 2.38  | ( -0.094 ,<br>-0.008 0.079 ) | 0.862 | ( -0.091 ,<br>-0.004 0.083 ) | 0.936 |
| Eotaxin.3     | 149 | 1.255 | 60 | 1.211 | ( -0.169 ,<br>-0.044 0.081 ) | 0.486 | ( -0.173 ,<br>-0.047 0.078 ) | 0.458 |

|          |     |       |    |       |        |                    |       |        |                    |       |
|----------|-----|-------|----|-------|--------|--------------------|-------|--------|--------------------|-------|
| I.309    | 149 | 0.09  | 60 | 0.096 | 0.006  | ( -0.074 , 0.086 ) | 0.882 | 0.003  | ( -0.077 , 0.082 ) | 0.948 |
| LIF      | 149 | 0.423 | 60 | 0.433 | 0.01   | ( -0.224 , 0.245 ) | 0.931 | 0.01   | ( -0.227 , 0.246 ) | 0.937 |
| MCP.2    | 149 | 1.684 | 60 | 1.686 | 0.002  | ( -0.053 , 0.057 ) | 0.946 | 0.003  | ( -0.053 , 0.059 ) | 0.911 |
| MCP.4    | 149 | 1.405 | 60 | 1.44  | 0.035  | ( -0.155 , 0.225 ) | 0.717 | 0.033  | ( -0.159 , 0.225 ) | 0.738 |
| MIP.1d   | 149 | 3.538 | 60 | 3.466 | -0.072 | ( -0.173 , 0.029 ) | 0.16  | -0.075 | ( -0.177 , 0.026 ) | 0.145 |
| SDF.1a.B | 149 | 3.397 | 60 | 3.475 | 0.078  | ( -0.034 , 0.190 ) | 0.171 | 0.078  | ( -0.034 , 0.191 ) | 0.17  |
| TARC     | 149 | 2.064 | 60 | 2.082 | 0.018  | ( -0.056 , 0.092 ) | 0.635 | 0.018  | ( -0.057 , 0.092 ) | 0.637 |
| TPO      | 149 | 2.269 | 60 | 2.267 | -0.002 | ( -0.236 , 0.231 ) | 0.983 | -0.007 | ( -0.242 , 0.228 ) | 0.955 |
| TRAIL    | 149 | 1.593 | 60 | 1.636 | 0.043  | ( -0.034 , 0.120 ) | 0.274 | 0.036  | ( -0.040 , 0.113 ) | 0.348 |

### Serum cytokine and chemokine analysis - less than 80% of samples detectable

| cytokine/<br>chemokine | percent<br>undetected | percent<br>detected | total n | unadjusted<br>odds ratio | unadjusted<br>confidence<br>interval | unadjusted<br>p-value | adjusted<br>odds ratio | adjusted<br>confidence<br>interval | adjusted p-<br>value |
|------------------------|-----------------------|---------------------|---------|--------------------------|--------------------------------------|-----------------------|------------------------|------------------------------------|----------------------|
| GM.CSF                 | 87.6                  | 12.4                | 209     | 0.554                    | ( 0.178 , 1.441 )                    | 0.259                 | 0.559                  | ( 0.179 , 1.465 )                  | 0.27                 |
| IL.2                   | 46.9                  | 53.1                | 209     | 1.013                    | ( 0.555 , 1.853 )                    | 0.967                 | 1.045                  | ( 0.571 , 1.924 )                  | 0.886                |
| IL.3                   | 93.3                  | 6.7                 | 209     | 0.66                     | ( 0.145 , 2.208 )                    | 0.536                 | 0.642                  | ( 0.141 , 2.162 )                  | 0.511                |
| IL.9                   | 33.5                  | 66.5                | 209     | 1.01                     | ( 0.539 , 1.930 )                    | 0.975                 | 0.94                   | ( 0.495 , 1.815 )                  | 0.851                |

|          |      |      |     |       |                      |       |       |                      |       |
|----------|------|------|-----|-------|----------------------|-------|-------|----------------------|-------|
| IL.12p70 | 71.3 | 28.7 | 209 | 0.458 | ( 0.210 ,<br>0.931 ) | 0.038 | 0.455 | ( 0.208 ,<br>0.928 ) | 0.037 |
| IL.17A   | 41.6 | 58.4 | 209 | 0.906 | ( 0.495 ,<br>1.670 ) | 0.751 | 0.873 | ( 0.474 ,<br>1.617 ) | 0.665 |
| IL.22    | 23.9 | 76.1 | 209 | 1.194 | ( 0.594 ,<br>2.518 ) | 0.628 | 1.189 | ( 0.588 ,<br>2.516 ) | 0.638 |
| M.CSF    | 39.2 | 60.8 | 209 | 1.287 | ( 0.695 ,<br>2.428 ) | 0.427 | 1.248 | ( 0.671 ,<br>2.363 ) | 0.489 |
| X6CKine  | 22   | 78   | 209 | 0.788 | ( 0.393 ,<br>1.627 ) | 0.508 | 0.762 | ( 0.378 ,<br>1.581 ) | 0.454 |
| IL.16    | 90.9 | 9.1  | 209 | 1.508 | ( 0.536 ,<br>3.959 ) | 0.414 | 1.424 | ( 0.503 ,<br>3.765 ) | 0.484 |
| IL.20    | 87.6 | 12.4 | 209 | 0.717 | ( 0.251 ,<br>1.788 ) | 0.499 | 0.703 | ( 0.244 ,<br>1.766 ) | 0.477 |
| IL.21    | 44   | 56   | 209 | 1.259 | ( 0.688 ,<br>2.334 ) | 0.458 | 1.221 | ( 0.664 ,<br>2.271 ) | 0.523 |
| IL.23    | 67.5 | 32.5 | 209 | 1.296 | ( 0.685 ,<br>2.423 ) | 0.419 | 1.252 | ( 0.658 ,<br>2.350 ) | 0.487 |
| IL.28A   | 89.5 | 10.5 | 209 | 1.18  | ( 0.430 ,<br>2.967 ) | 0.733 | 1.112 | ( 0.402 ,<br>2.817 ) | 0.828 |
| IL.33    | 56.5 | 43.5 | 209 | 1.087 | ( 0.592 ,<br>1.985 ) | 0.787 | 1.06  | ( 0.575 ,<br>1.944 ) | 0.851 |
| SCF      | 86.6 | 13.4 | 209 | 0.992 | ( 0.390 ,<br>2.322 ) | 0.986 | 1.044 | ( 0.403 ,<br>2.500 ) | 0.925 |
| TSLP     | 59.3 | 40.7 | 209 | 0.962 | ( 0.518 ,<br>1.766 ) | 0.9   | 0.914 | ( 0.489 ,<br>1.689 ) | 0.776 |

**BV negative/positive by serum cytokine and chemokine undetected/detected 2x2 contingency tables**

GM.CSF

| BV       | undetected | percent undetected | detected | percent detected | total | percent total |
|----------|------------|--------------------|----------|------------------|-------|---------------|
| negative | 128        | 69.90%             | 21       | 80.80%           | 149   | 71.30%        |

|          |     |        |    |        |     |        |
|----------|-----|--------|----|--------|-----|--------|
| positive | 55  | 30.10% | 5  | 19.20% | 60  | 28.70% |
| TOTAL    | 183 | 87.6   | 26 | 12.4   | 209 | 100%   |

### IL.2

|          | percent    |            | percent  |          | percent |        |
|----------|------------|------------|----------|----------|---------|--------|
| BV       | undetected | undetected | detected | detected | total   | total  |
| negative | 70         | 71.40%     | 79       | 71.20%   | 149     | 71.30% |
| positive | 28         | 28.60%     | 32       | 28.80%   | 60      | 28.70% |
| TOTAL    | 98         | 46.9       | 111      | 53.1     | 209     | 100%   |

### IL.3

|          | percent    |            | percent  |          | percent |        |
|----------|------------|------------|----------|----------|---------|--------|
| BV       | undetected | undetected | detected | detected | total   | total  |
| negative | 138        | 70.80%     | 11       | 78.60%   | 149     | 71.30% |
| positive | 57         | 29.20%     | 3        | 21.40%   | 60      | 28.70% |
| TOTAL    | 195        | 93.3       | 14       | 6.7      | 209     | 100%   |

### IL.9

|          | percent    |            | percent  |          | percent |        |
|----------|------------|------------|----------|----------|---------|--------|
| BV       | undetected | undetected | detected | detected | total   | total  |
| negative | 50         | 71.40%     | 99       | 71.20%   | 149     | 71.30% |
| positive | 20         | 28.60%     | 40       | 28.80%   | 60      | 28.70% |
| TOTAL    | 70         | 33.5       | 139      | 66.5     | 209     | 100%   |

### IL.12p70

|          | percent    |            | percent  |          | percent |        |
|----------|------------|------------|----------|----------|---------|--------|
| BV       | undetected | undetected | detected | detected | total   | total  |
| negative | 100        | 67.10%     | 49       | 81.70%   | 149     | 71.30% |
| positive | 49         | 32.90%     | 11       | 18.30%   | 60      | 28.70% |
| TOTAL    | 149        | 71.3       | 60       | 28.7     | 209     | 100%   |

### IL.17A

|          |            | percent    |          | percent  |       | percent |
|----------|------------|------------|----------|----------|-------|---------|
| BV       | undetected | undetected | detected | detected | total | total   |
| negative | 61         | 70.10%     | 88       | 72.10%   | 149   | 71.30%  |
| positive | 26         | 29.90%     | 34       | 27.90%   | 60    | 28.70%  |
| TOTAL    | 87         | 41.6       | 122      | 58.4     | 209   | 100%    |

#### IL.22

|          |            | percent    |          | percent  |       | percent |
|----------|------------|------------|----------|----------|-------|---------|
| BV       | undetected | undetected | detected | detected | total | total   |
| negative | 37         | 74.00%     | 112      | 70.40%   | 149   | 71.30%  |
| positive | 13         | 26.00%     | 47       | 29.60%   | 60    | 28.70%  |
| TOTAL    | 50         | 23.9       | 159      | 76.1     | 209   | 100%    |

#### M.CSF

|          |            | percent    |          | percent  |       | percent |
|----------|------------|------------|----------|----------|-------|---------|
| BV       | undetected | undetected | detected | detected | total | total   |
| negative | 61         | 74.40%     | 88       | 69.30%   | 149   | 71.30%  |
| positive | 21         | 25.60%     | 39       | 30.70%   | 60    | 28.70%  |
| TOTAL    | 82         | 39.2       | 127      | 60.8     | 209   | 100%    |

#### X6CKine

|          |            | percent    |          | percent  |       | percent |
|----------|------------|------------|----------|----------|-------|---------|
| BV       | undetected | undetected | detected | detected | total | total   |
| negative | 31         | 67.40%     | 118      | 72.40%   | 149   | 71.30%  |
| positive | 15         | 32.60%     | 45       | 27.60%   | 60    | 28.70%  |
| TOTAL    | 46         | 22         | 163      | 78       | 209   | 100%    |

#### IL.16

|          |            | percent    |          | percent  |       | percent |
|----------|------------|------------|----------|----------|-------|---------|
| BV       | undetected | undetected | detected | detected | total | total   |
| negative | 137        | 72.10%     | 12       | 63.20%   | 149   | 71.30%  |
| positive | 53         | 27.90%     | 7        | 36.80%   | 60    | 28.70%  |



|       |     |      |    |     |     |      |
|-------|-----|------|----|-----|-----|------|
| TOTAL | 190 | 90.9 | 19 | 9.1 | 209 | 100% |
|-------|-----|------|----|-----|-----|------|

IL.20

|          | percent    |            | percent  |          |       | percent |
|----------|------------|------------|----------|----------|-------|---------|
| BV       | undetected | undetected | detected | detected | total | total   |
| negative | 129        | 70.50%     | 20       | 76.90%   | 149   | 71.30%  |
| positive | 54         | 29.50%     | 6        | 23.10%   | 60    | 28.70%  |
| TOTAL    | 183        | 87.6       | 26       | 12.4     | 209   | 100%    |

IL.21

|          | percent    |            | percent  |          |       | percent |
|----------|------------|------------|----------|----------|-------|---------|
| BV       | undetected | undetected | detected | detected | total | total   |
| negative | 68         | 73.90%     | 81       | 69.20%   | 149   | 71.30%  |
| positive | 24         | 26.10%     | 36       | 30.80%   | 60    | 28.70%  |
| TOTAL    | 92         | 44         | 117      | 56       | 209   | 100%    |

IL.23

|          | percent    |            | percent  |          |       | percent |
|----------|------------|------------|----------|----------|-------|---------|
| BV       | undetected | undetected | detected | detected | total | total   |
| negative | 103        | 73.00%     | 46       | 67.60%   | 149   | 71.30%  |
| positive | 38         | 27.00%     | 22       | 32.40%   | 60    | 28.70%  |
| TOTAL    | 141        | 67.5       | 68       | 32.5     | 209   | 100%    |

IL.28A

|          | percent    |            | percent  |          |       | percent |
|----------|------------|------------|----------|----------|-------|---------|
| BV       | undetected | undetected | detected | detected | total | total   |
| negative | 134        | 71.70%     | 15       | 68.20%   | 149   | 71.30%  |
| positive | 53         | 28.30%     | 7        | 31.80%   | 60    | 28.70%  |
| TOTAL    | 187        | 89.5       | 22       | 10.5     | 209   | 100%    |

IL.33

|          | percent    |            | percent  |          | percent |        |
|----------|------------|------------|----------|----------|---------|--------|
| BV       | undetected | undetected | detected | detected | total   | total  |
| negative | 85         | 72.00%     | 64       | 70.30%   | 149     | 71.30% |
| positive | 33         | 28.00%     | 27       | 29.70%   | 60      | 28.70% |
| TOTAL    | 118        | 56.5       | 91       | 43.5     | 209     | 100%   |

SCF

|          | percent    |            | percent  |          | percent |        |
|----------|------------|------------|----------|----------|---------|--------|
| BV       | undetected | undetected | detected | detected | total   | total  |
| negative | 129        | 71.30%     | 20       | 71.40%   | 149     | 71.30% |
| positive | 52         | 28.70%     | 8        | 28.60%   | 60      | 28.70% |
| TOTAL    | 181        | 86.6       | 28       | 13.4     | 209     | 100%   |

TSLP

|          | percent    |            | percent  |          | percent |        |
|----------|------------|------------|----------|----------|---------|--------|
| BV       | undetected | undetected | detected | detected | total   | total  |
| negative | 88         | 71.00%     | 61       | 71.80%   | 149     | 71.30% |
| positive | 36         | 29.00%     | 24       | 28.20%   | 60      | 28.70% |
| TOTAL    | 124        | 59.3       | 85       | 40.7     | 209     | 100%   |
